# Supplementary material for: An investigation of irreproducibility in maximum likelihood phylogenetic inference
Source: PubMed Central journal article supplement (PMC7705714; doi:10.1038/s41467-020-20005-6), 2020-11-30
Supplement: 41467_2020_20005_MOESM1_ESM.pdf [file 41467_2020_20005_MOESM1_ESM.pdf]

**Supplementary Information for**  
**An investigation of irreproducibility in maximum likelihood phylogenetic**  
**inference**

Correspondence to: xingxingshen@zju.edu.cn (XXS), antonis.rokas@vanderbilt.edu (AR)

**This PDF includes:**

Supplementary Text

Note 1

Note 2

Supplementary Figures 1-15

Supplementary References

## Supplementary Text

### Summary of 15 phylogenomic datasets examined in this study.

| Dataset               | No. Taxa | No Loci | Sampling Method | Data Type | Study Reference                                                |
|-----------------------|----------|---------|-----------------|-----------|----------------------------------------------------------------|
| Animal: Bees          | 190      | 753     | UCE             | DNA       | Blaimer et al. Evolution, 2018 <sup>1</sup>                    |
| Animal: Birds         | 200      | 259     | AHE             | DNA       | Prum et al. Nature, 2015 <sup>2</sup>                          |
| Animal: Butterflies   | 207      | 352     | AHE             | DNA       | Espeland et al. Current Biology, 2018 <sup>3</sup>             |
| Animal: Lizards       | 29       | 1361    | Exon-Capture    | DNA       | Blom et al. Syst Biol, 2017 <sup>4</sup>                       |
| Animal: Marine fishes | 120      | 1001    | UCE             | DNA       | Alfaro et al. 2018, Nat. Ecol. Evol. <sup>5</sup>              |
| Animal: Rodents       | 37       | 1245    | Exon-Capture    | DNA       | Roycroft et al. Syst Biol, 2019 <sup>6</sup>                   |
| Plant: Cardueae       | 85       | 570     | UCE             | DNA       | Herrando-Moraira et al. Mol Phyloge Evol, 2018 <sup>7</sup>    |
| Plant: Caryophyllales | 95       | 1122    | Transcriptome   | AA        | Yang et al. Mol Biol Evol, 2015 <sup>8</sup>                   |
| Plant: Green plants   | 1178     | 410     | Transcriptome   | AA        | 1KP Initiative 2019, Nature <sup>9</sup>                       |
| Plant: Jaltomata      | 15       | 6431    | Transcriptome   | DNA       | Wu et al. Mol Ecol, 2018 <sup>10</sup>                         |
| Plant: Protea         | 65       | 498     | AHE             | DNA       | Mitchell et al. American Journal of Botany, 2017 <sup>11</sup> |
| Fungi: Aspergillaceae | 93       | 1668    | Genome          | DNA       | Steenwyk et al. mBio, 2019 <sup>12</sup>                       |
| Fungi: Budding yeasts | 343      | 2408    | Genome          | AA        | Shen et al. 2018, Cell <sup>13</sup>                           |
| Fungi: Hanseniaspora  | 29       | 1033    | Genome          | AA        | Steenwyk et al. PloS Biol, 2019 <sup>14</sup>                  |
| Fungi: Rhizoplaca     | 31       | 303     | Genome          | DNA       | Leavitt et al., Sci Rep, 2016 <sup>15</sup>                    |

UCE: Ultraconserved Element, AHE: Anchored Hybrid Enriched, DNA: deoxyribonucleic acid, AA: amino acid.

### Note 1. Commands, parameter settings, and job submission files used in gene tree inference

For each of the 19,414 gene alignments from 15 phylogenomic studies in animals, plants, and fungi, we executed two replicates (Run1 and Run2) to test whether phylogenetic tree inferred by Run1 analysis is topologically identical to phylogenetic tree inferred by Run2 or not (Fig.1). The two replicates used exactly the same parameter settings including ML program, gene alignment, substitution model, random seed, number of threads, number of tree searches, and log-likelihood epsilon for optimization.

#### 1. Gene tree inference on DNA gene alignments

For all DNA gene alignments, the GTR+G4+F substitution model was used.

Given a DNA gene alignment file named *LI.fasta*, below are the commands and parameter settings used for inferring gene trees with 2 replicates in IQ-TREE multi-thread version 1.6.8 and in RAxML-NG multi-thread version 0.9.0, respectively.

### ***IQ-TREE***

```
iqtree -s L1.fasta -st DNA -m GTR+G4+F -seed 4760742 -nt 2 --runs 20  
-me 0.0001 -pre iqtree_L1_run1  
iqtree -s L1.fasta -st DNA -m GTR+G4+F -seed 4760742 -nt 2 --runs 20  
-me 0.0001 -pre iqtree_L1_run2
```

### ***RAxML-NG***

```
raxml-ng --msa L1.fasta --search -msa-format FASTA --model GTR+G4+F  
-seed 967956542 --threads 2 --tree pars{10},rand{10} --lh-epsilon  
0.0001 --prefix raxml-ng_L1_run1  
raxml-ng --msa L1.fasta --search -msa-format FASTA --model GTR+G4+F  
-seed 967956542 --threads 2 --tree pars{10},rand{10} --lh-epsilon  
0.0001 --prefix raxml-ng_L1_run2
```

## **2. Gene tree inference on amino acid gene alignments**

For amino acid sequence alignments, the best-fitting substitution model reported in original study was used (all substitution models are available on the figshare depository). For genes in the green plant dataset (410 genes and 1,178 taxa) and the budding yeast dataset (2,408 genes and 343 taxa), we set the number of tree searches to two (IQ-TREE with “--runs 2” option; RAxML-NG with “--tree pars{1},rand{1}” option) because of computetime limitations (three days) on the supercomputing cluster.

Given an amino acid alignment file named *ORTHOMCL1000.fasta*, below are the commands and parameter settings used for inferring gene trees with 2 replicates using IQ-TREE multi-thread version 1.6.8 and RAxML-NG multi-thread version 0.9.0, respectively.

### ***IQ-TREE***

```
iqtree -s ORTHOMCL1000.fasta -st AA -m LG+G4 -seed 529418945 -nt 2 -  
-runs 20 -me 0.0001 -pre iqtree_ORTHOMCL1000_run1  
iqtree -s ORTHOMCL1000.fasta -st AA -m LG+G4 -seed 529418945 -nt 2 -  
-runs 20 -me 0.0001 -pre iqtree_ORTHOMCL1000_run2
```

### ***RAxML-NG***

```
raxml-ng --msa ORTHOMCL1000.fasta --search -msa-format FASTA --model  
LG+G4 -seed 652954101 --threads 2 --tree pars{10},rand{10} --lh-  
epsilon 0.0001 --prefix raxml-ng_ORTHOMCL1000_run1  
raxml-ng --msa ORTHOMCL1000.fasta --search -msa-format FASTA --model  
LG+G4 -seed 652954101 --threads 2 --tree pars{10},rand{10} --lh-  
epsilon 0.0001 --prefix raxml-ng_ORTHOMCL1000_run2
```

## **3. Assessment of reproducibility of single-gene phylogenies inferred by Run1 and Run2**

For a given gene alignment *LI*, its phylogenetic inference is reproducible if two gene trees inferred from two replicates (Run1 and Run2) are topologically identical (i.e., the normalized Robinson–Foulds tree distance = 0); in contrast, its phylogenetic inference is irreproducible if two gene trees inferred from two replicates (Run1 and Run2) are topologically different from each other (i.e., the normalized Robinson–Foulds tree distance > 0). The normalized Robinson–Foulds tree distance (normalized RFD) between two gene trees inferred from two replicates (Run1 and Run2) was calculated by the raxmlHPC-PTHREADS-SSE3 version 8.2.3<sup>16</sup>.

```
raxmlHPC-PTHREADS-SSE3 -T 2 -f r -m GTRGAMMA -z  
iqtree_L1_run12.trees -n iqtree_L1_run12_rf  
raxmlHPC-PTHREADS-SSE3 -T 2 -f r -m GTRGAMMA -z raxml-  
ng_L1_run12.trees -n raxml-ng_L1_run12_rf -z raxml-ng_L1_run12.trees  
-n raxml-ng_L1_run12_rf
```

If two single-gene trees inferred from two replicates (Run1 and Run2) are topologically different from each other, we used the approximately unbiased (AU) test<sup>17</sup> to examine whether Run1 and Run2 yielded two significantly different single-gene trees (P-value  $\leq 0.05$ ). The AU test was implemented in IQ-TREE multi-thread version 1.6.8.

```
iqtree -nt 3 -st DNA -seed 123456 -me 0.0001 -s L1.fasta -m GTR+G4+F  
-z iqtree_L1_run12.trees(or raxml-ng_L1_run12.trees) -zb 1000 -n 0 -  
au -pre $output_AU
```

#### **4. Assessment of reliability of each internal branch of single-gene phylogenies inferred by Run1 and Run2**

Since running all 19,414 gene alignments from 15 phylogenomic datasets was computationally intractable, we sampled the first 100 genes from each dataset. For each of the 1,500 gene alignments from 15 phylogenomic studies in animals, plants, and fungi, we executed two replicates (Run1 and Run2) to evaluate the support of each internal branch using 1,000 ultrafast bootstrap replicates (the option “-bb 1000”) and 100 standard bootstrap replicates (the option “--bs-trees 100”) for IQ-TREE analysis and RAxML-NG, respectively.

#### **DNA gene alignments**

For all DNA gene alignments, the GTR+G4+F substitution model was used.

Given a DNA gene alignment file named *LI.fasta*, below are the commands and parameter settings used for inferring gene trees with 2 replicates in IQ-TREE multi-thread version 1.6.8 and in RAxML-NG multi-thread version 0.9.0, respectively.

#### ***IQ-TREE***

```
iqtree -s L1.fasta -st DNA -m GTR+G4+F -seed 4760742 -nt 2 --runs 10
```



```
-me 0.0001 -bb 1000 -pre iqtree_L1_run1
iqtree -s L1.fasta -st DNA -m GTR+G4+F -seed 4760742 -nt 2 --runs 10
-me 0.0001 -bb 1000 -pre iqtree_L1_run2
```

### ***RAXML-NG***

```
raxml-ng --msa L1.fasta --all -msa-format FASTA --model GTR+G4+F -
seed 967956542 --threads 2 --tree pars{5},rand{5} --lh-epsilon
0.0001 --bs-trees 100 --prefix raxml-ng_L1_run1
raxml-ng --msa L1.fasta --all -msa-format FASTA --model GTR+G4+F -
seed 967956542 --threads 2 --tree pars{5},rand{5} --lh-epsilon
0.0001 --bs-trees 100 --prefix raxml-ng_L1_run2
```

### **Amino acid gene alignments**

For amino acid sequence alignments, the best-fitting substitution model reported in original study was used (all substitution models are available on the figshare depository).

Given an amino acid alignment file named *ORTHOMCL1000.fasta*, below are the commands and parameter settings used for inferring gene trees with 2 replicates using IQ-TREE multi-thread version 1.6.8 and RAXML-NG multi-thread version 0.9.0, respectively.

### ***IQ-TREE***

```
iqtree -s ORTHOMCL1000.fasta -st AA -m LG+G4 -seed 529418945 -nt 2 -
-runs 10 -me 0.0001 -bb 1000 -pre iqtree_ORTHOMCL1000_run1
iqtree -s ORTHOMCL1000.fasta -st AA -m LG+G4 -seed 529418945 -nt 2 -
-runs 10 -me 0.0001 -bb 1000 -pre iqtree_ORTHOMCL1000_run2
```

### ***RAXML-NG***

```
raxml-ng --msa ORTHOMCL1000.fasta --all -msa-format FASTA --model
LG+G4 -seed 652954101 --threads 2 --tree pars{5},rand{5} --lh-
epsilon 0.0001 --bs-trees 100 --prefix raxml-ng_ORTHOMCL1000_run1
raxml-ng --msa ORTHOMCL1000.fasta --all -msa-format FASTA --model
LG+G4 -seed 652954101 --threads 2 --tree pars{5},rand{5} --lh-
epsilon 0.0001 --bs-trees 100 --prefix raxml-ng_ORTHOMCL1000_run2
```

## Job submission on the CHTC supercomputing cluster (University of Wisconsin-Madison)

Execution of jobs on the CHTC cluster uses a software called HTCondor:

- 1) Two replicates (Run1 and Run2) submitted to **two separate nodes**

Given that there is a DNA gene alignment file named *L1.fasta*, below are the job submission files for running IQ-TREE and RAxML-NG.

### ***IQ-TREE***

```
universe = vanilla
log = file.log
error = file.err
output = file.out
should_transfer_files = Yes
when_to_transfer_output = ON_EXIT
request_cpus = 2
request_memory = 1GB
request_disk = 100MB
getenv = true
requirements = (OpSysMajorVer == 7)
executable = /home/nu_shenx3/tools/iqtree-1.6.8-Linux/bin/iqtree
transfer_input_files = ../data/L1.fasta
Arguments = -s L1.fasta -st DNA -m GTR+G4+F -seed 4760742 -nt 2 --runs 20 -me 0.0001 -pre iqtree_L1_run1
queue
executable = /home/nu_shenx3/tools/iqtree-1.6.8-Linux/bin/iqtree
transfer_input_files = ../data/L1.fasta
Arguments = -s L1.fasta -st DNA -m GTR+G4+F -seed 4760742 -nt 2 --runs 20 -me 0.0001 -pre iqtree_L1_run2
queue
```

## ***RAxML-NG.***

```
universe = vanilla
log = file.log
error = file.err
output = file.out
should_transfer_files = Yes
when_to_transfer_output = ON_EXIT
request_cpus = 2
request_memory = 1GB
request_disk = 100MB
getenv = true
requirements = (OpSysMajorVer == 7)
executable = /home/nu_shenx3/tools/raxml-ng-0.9.0/raxml-ng
transfer_input_files = ../data/L1.fasta
Arguments = --msa L1.fasta -msa-format FASTA --model GTR+G4+F -seed 967956542 --threads 2 --tree
pars{10};rand{10} --lh-epsilon 0.0001 --prefix raxml-ng_L1_run1
queue
executable = /home/nu_shenx3/tools/raxml-ng-0.9.0/raxml-ng
transfer_input_files = ../data/L1.fasta
Arguments = --msa L1.fasta -msa-format FASTA --model GTR+G4+F -seed 967956542 --threads 2 --tree
pars{10};rand{10} --lh-epsilon 0.0001 --prefix raxml-ng_L1_run2
queue
```

- 2) Two replicates (Run1 and Run2) submitted to a **single node** (two replicates ran one after the other with same processor on a single node)

Given that there is a DNA gene alignment file named *L1.fasta*, below are the job submission files for running IQ-TREE and RAxML-NG.

### ***IQ-TREE***

```
universe = vanilla
log = file.log
error = file.err
output = file.out
should_transfer_files = Yes
when_to_transfer_output = ON_EXIT
request_cpus = 2
request_memory = 1GB
request_disk = 100MB
getenv = true
requirements = (OpSysMajorVer == 7)
executable = iqtree_L1.fasta_run12.sh
transfer_input_files = ../data/L1.fasta,/home/nu_shenx3/tools/iqtree-1.6.8-Linux/bin/iqtree
queue
```

### ***iqtree\_L1.fasta\_run12.sh***

```
#!/bin/bash
./iqtree -s L1.fasta -st DNA -m GTR+G4+F -seed 4760742 -nt 2 --runs 20 -me 0.0001 -pre iqtree_L1_run1
./iqtree -s L1.fasta -st DNA -m GTR+G4+F -seed 4760742 -nt 2 --runs 20 -me 0.0001 -pre iqtree_L1_run2
```

## ***RAxML-NG.***

```
universe = vanilla
log = file.log
error = file.err
output = file.out
should_transfer_files = Yes
when_to_transfer_output = ON_EXIT
request_cpus = 2
request_memory = 1GB
request_disk = 100MB
getenv = true
requirements = (OpSysMajorVer == 7)
executable = raxml-ng_L1.fasta_run12.sh
transfer_input_files = ../data/L1.fasta, /home/nu_shenx3/tools/raxml-ng-0.9.0/raxml-ng
queue
```

## ***raxml-ng\_L1.fasta\_run12.sh***

```
#!/bin/bash
./raxml-ng --msa L1.fasta -msa-format FASTA --model GTR+G4+F -seed 967956542 --threads 2 --tree
pars{10};rand{10} --lh-epsilon 0.0001 --prefix raxml-ng_L1_run1
./raxml-ng --msa L1.fasta -msa-format FASTA --model GTR+G4+F -seed 967956542 --threads 2 --tree
pars{10};rand{10} --lh-epsilon 0.0001 --prefix raxml-ng_L1_run2
```

## Simulations

To the accuracy of gene tree estimation for irreproducible and reproducible genes, we first generated 15 balanced trees and 15 star trees, both with 64 taxa, each of which was scaled by branch length  $\alpha$  ( $\alpha = 0.001, 0.002, 0.003, 0.004, 0.005, 0.006, 0.007, 0.008, 0.009, 0.01, 0.02, 0.04, 0.06, 0.08, \text{ or } 0.1$ ) (Fig. 5a), respectively. Next, each reference species tree *T <sub>$\alpha$</sub> .newick* was used to generate 500 nucleotide gene alignments with randomly varying length *L* from 300 to 1,000 base pairs using Seq-Gen.v1.3.2<sup>18</sup> under the GTR +G4 model, shape for the gamma rate heterogeneity =1, proportion of invariable Sites=0, and equal state frequency.

```
seq-gen -mGTR -a1 -g4 -i0 -f0.25,0.25,0.25,0.25 -lL -n1 -or -  
z[Random seed number] < T $\alpha$ .newick > T $\alpha$ _genei.phy
```

*T <sub>$\alpha$</sub> .newick* is one of 30 64-taxon trees

*L* is randomized between 300 and 1,000

**Random seed number:** int (rand(10000000))+1 in custom perl;

*i* is from 1 to 500

A total number of simulated gene alignments is 15,000 (30 reference trees \* 500 genes). Detailed values are given in the file entitled “Seq\_Gen\_run.bat” on the figshare repository.

## **Note 2. Suggestions for increasing the reproducibility of phylogenetic analyses**

Our results showed that while the public availability of gene sequence alignment, program, substitution model, and number of independent tree searches are prerequisites for the reproducibility of phylogenies, they alone are not sufficient. We found that random starting seed number, number of threads, and processor type can also affect the reproducibility of ML phylogenies.

- a) Random seed number can be specified in IQ-TREE<sup>19</sup> and RAxML-NG<sup>20</sup> with the “-seed” option and the “--seed” option, respectively.
- b) Number of threads can be specified in IQ-TREE and RAxML-NG with the “-nt” option and the “--threads” option, respectively. Note that the use of three or more threads in the current version of IQ-TREE substantially increases the chance of topological irreproducibility and different log-likelihood scores when gene alignments with low numbers of parsimony-informative sites are analyzed<sup>21,22</sup> because of the different addition orders of the per-site log likelihoods (when three or more threads are used).
- c) Processor settings in RAxML-NG can be specified for the kernel with the “--simd” option. To avoid the variation of kernels between processors, users can specify the use of a specific set of vector instructions (e.g., “--simd sse3”) or set the analysis to be performed using non-vectorized kernels with the “--simd none” option. IQ-TREE does not provide an option for the specification of the kernel.

A more practical way may be the releasing of the log file of each analysis, which contains a record of the values of all these key parameters (e.g., alignment, program name, number of tree searches, substitution model, type of processor, number of threads, and random starting seed).

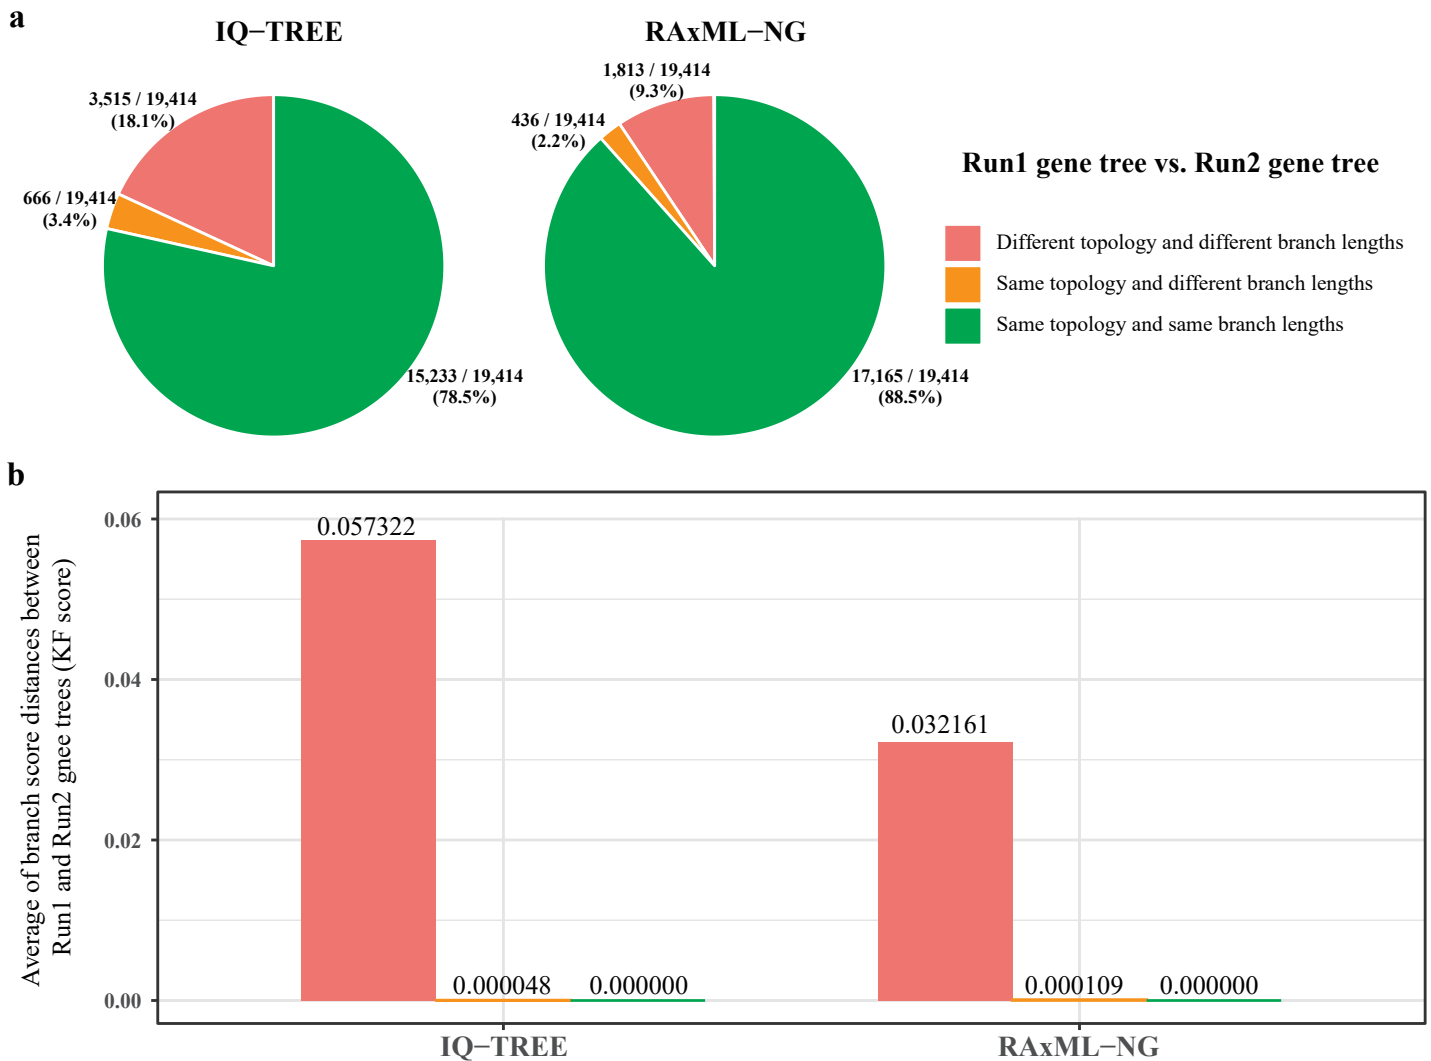

**Supplementary Figure 1. Comparisons of topology and branch lengths between two gene trees inferred by two replicates (Run1 and Run2).** To compare topology and branch lengths between two gene trees, normalized Robinson–Foulds tree distance (nRFD) and branch score distance of Kuhner and Felsenstein (KF) are computed with the R packages *ape* and *phangorn*, respectively. a) Using IQ-TREE, 3,515 / 19,414 (18.1%) gene alignments from 15 phylogenomic datasets yielded different topologies (nRFD > 0) and different branch lengths (KF > 0) between two replicates (red), 666 (3.4%) yielded same topologies (nRFD = 0) and different branch lengths (KF > 0) (yellow), while the remaining 15,233 (78.5%) yielded same topologies (nRFD = 0) and same branch lengths (KF = 0) (green). Using RAxML-NG, 1,813 (9.3%) genes yielded different topologies (nRFD > 0) and different branch lengths (KF > 0) between two replicates (red), 436 (2.2%) yielded same topologies (nRFD = 0) and different branch lengths (KF > 0) (yellow), while the remaining 17,165 (88.5%) yielded same topologies (nRFD = 0) and same branch lengths (KF = 0) (green). b) For each category, we calculated overall mean of the branch score distances. All 77,656 analyses (19,414 alignments \* 2 replicates \* 2 ML programs) were run using 2 threads per node on the Center for High Throughput Computing (CHTC) at the University of Wisconsin-Madison.



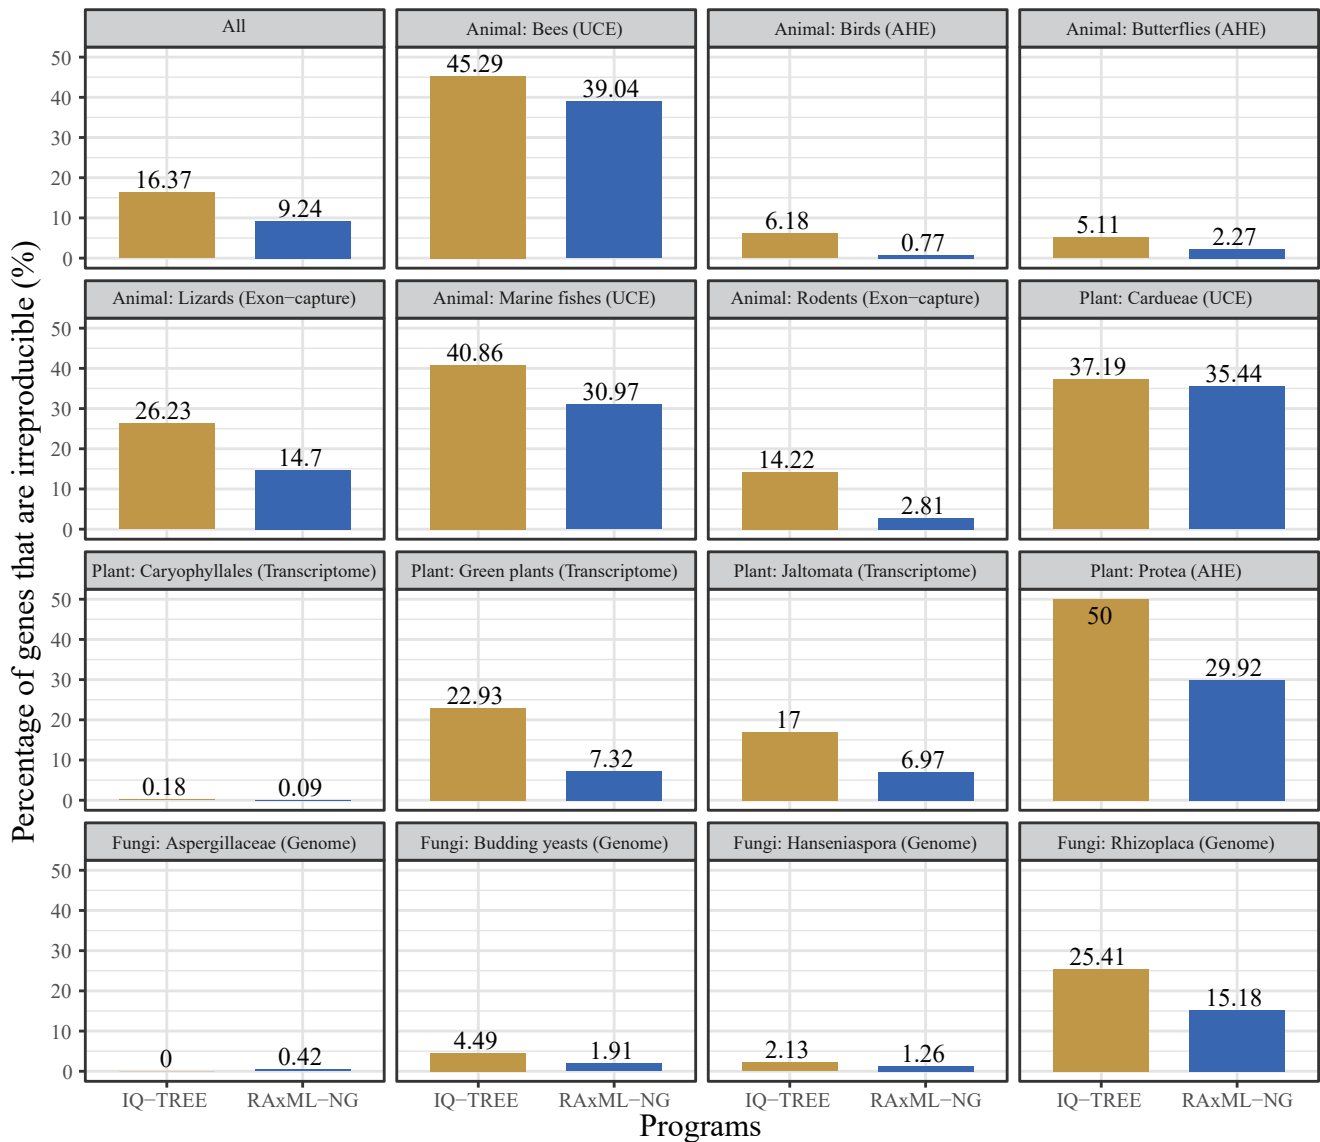

**Supplementary Figure 2. A considerable number of genes in phylogenomic datasets produce irreproducible phylogenies on the ACCRE supercomputing cluster.** The reproducibility of phylogenies of 19,414 genes from 15 phylogenomic datasets was assessed between two replicates (Run1 and Run2) that ran on two separate nodes on 2 CPU cores (threads) using IQ-TREE and RAxML-NG, respectively. Bar plots show the percentages of genes that are irreproducible when using IQ-TREE (in yellow) and RAxML-NG (in blue), respectively. The bar plot at the upper left is based on all 19,414 genes from 15 phylogenomic datasets (see Supplementary Data 1); it shows that the phylogenies of 3,178 / 19,414 genes (16.37%) and 1,793 / 19,414 genes (9.24%) are irreproducible between two replicates (Run1 and Run2) using IQ-TREE (in yellow) and RAxML-NG (in blue), respectively. The rest of the bar plots show the individual results for each of the 15 phylogenomic datasets. These datasets were constructed using five different but widely accepted gene sampling approaches (shown in parentheses): Ultraconserved Element (UCE) capture, Anchored Hybrid Enriched (AHE) capture, conserved exon capture, transcriptome sequencing, and whole genome sequencing. All 77,656 analyses (19,414 genes \* 2 replicates \* 2 ML programs) were run on the Advanced Computing Center for Research and Education (ACCRE) at Vanderbilt University. Detailed values are given in Supplementary Data 3.

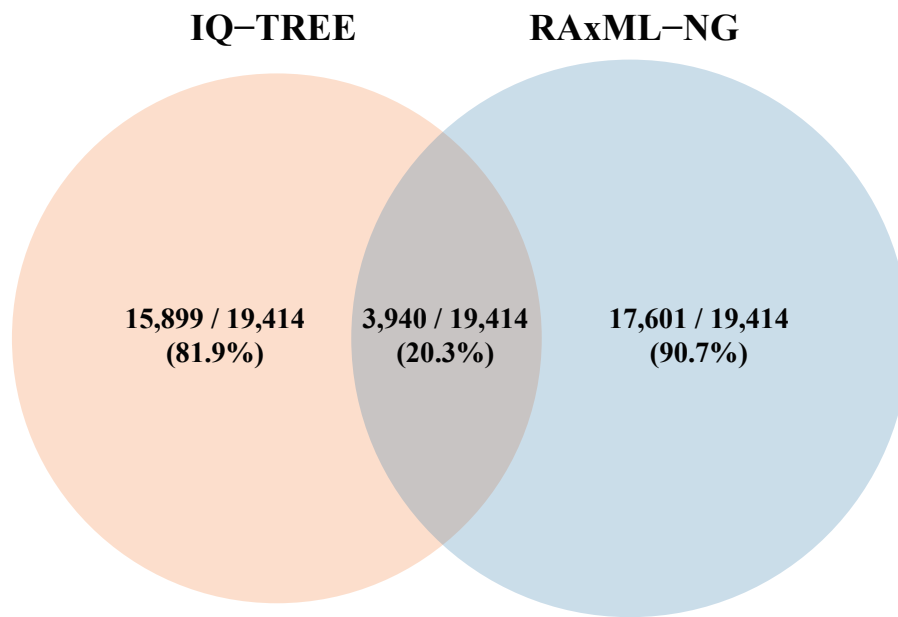

**Supplementary Figure 3. A small number of genes in phylogenomic datasets produce reproducible phylogenies between IQ-TREE and RAxML-NG.** 15,899 / 19,414 genes (81.9%) and 17,601 / 19,414 genes (90.7%) yielded topologically reproducible phylogenies between two replicates (Run1 and Run2) using IQ-TREE (in yellow) and RAxML-NG (in blue), respectively. However, the number of genes that yielded topologically reproducible phylogenies between IQ-TREE and RAxML-NG is 3,940 (20.3%). All 77,656 analyses (19,414 alignments \* 2 replicates \* 2 ML programs) were run using 2 threads per node on the Center for High Throughput Computing (CHTC) at the University of Wisconsin-Madison.

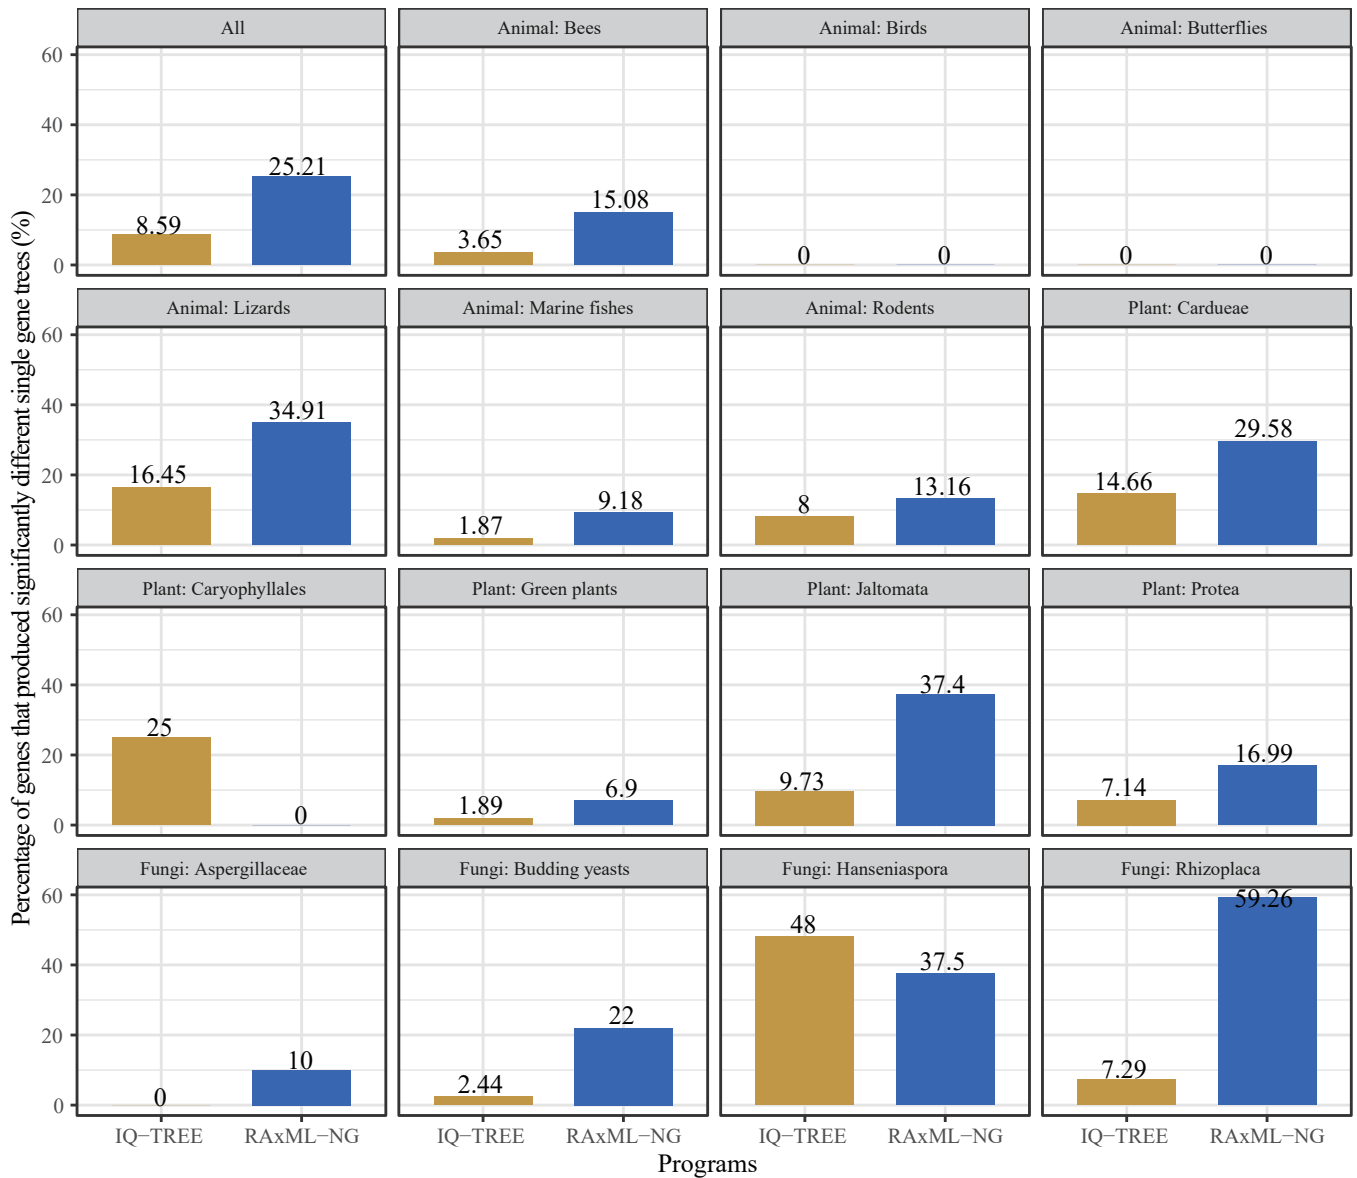

**Supplementary Figure 4. Percentage of genes that that produced significantly irreproducible phylogenetic trees between two replicates in phylogenomic datasets on the CHTC supercomputing cluster.** Bar plots show the percentages of genes produced significantly irreproducible phylogenetic trees (the two-sided AU test;  $P$ -value  $\leq 0.05$ ) between two replicates when using IQ-TREE (in yellow) and RAxML-NG (in blue), respectively. The bar plot at the upper left is based on all 19,414 genes from 15 phylogenomic datasets (see Supplementary Data 1); it shows the Run1 and Run2 topologies for 302 / 3,515 (8.59%) irreproducible single-gene ML phylogenies generated by IQ-TREE and 457 / 1,813 (25.2%) irreproducible phylogenies generated by RAxML were significantly different (the approximately unbiased (AU) test;  $P$ -value  $\leq 0.05$ ). The rest of the bar plots show the individual results for each of the 15 phylogenomic datasets.

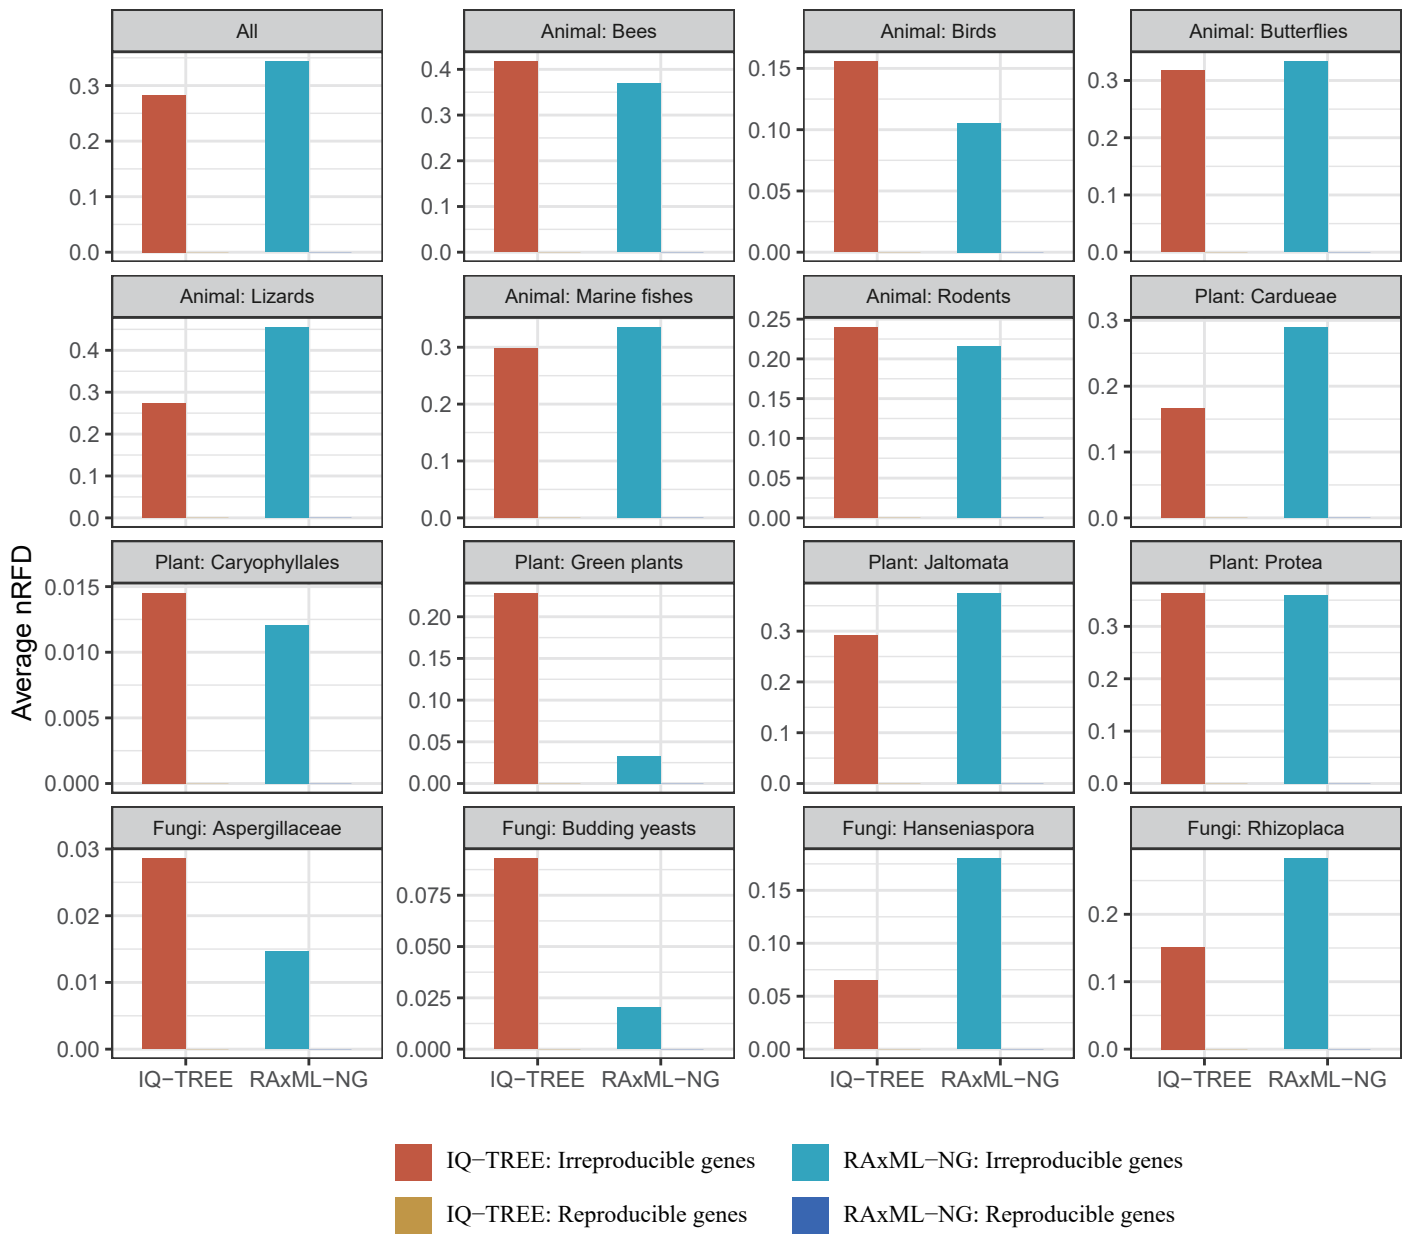

**Supplementary Figure 5. Average tree distance between Run1 and Run2 replicates of 19,414 genes in 15 phylogenomic datasets.** For each gene, the normalized Robinson–Foulds tree distance (nRFD) was estimated based on two gene trees inferred from the Run1 and Run2 replicates. Bar plot at upper left is based on all 19,414 genes from 15 phylogenomic datasets. All other bar plots show the results of each of the 15 phylogenomic datasets. Genes yielding irreproducible phylogenies are colored in red and genes yielding reproducible phylogenies are colored in yellow when using IQ-TREE; genes yielding irreproducible phylogenies are colored in green and genes yielding reproducible phylogenies are colored in blue when using RAxML-NG. Detailed values are given in Supplementary Data 2.

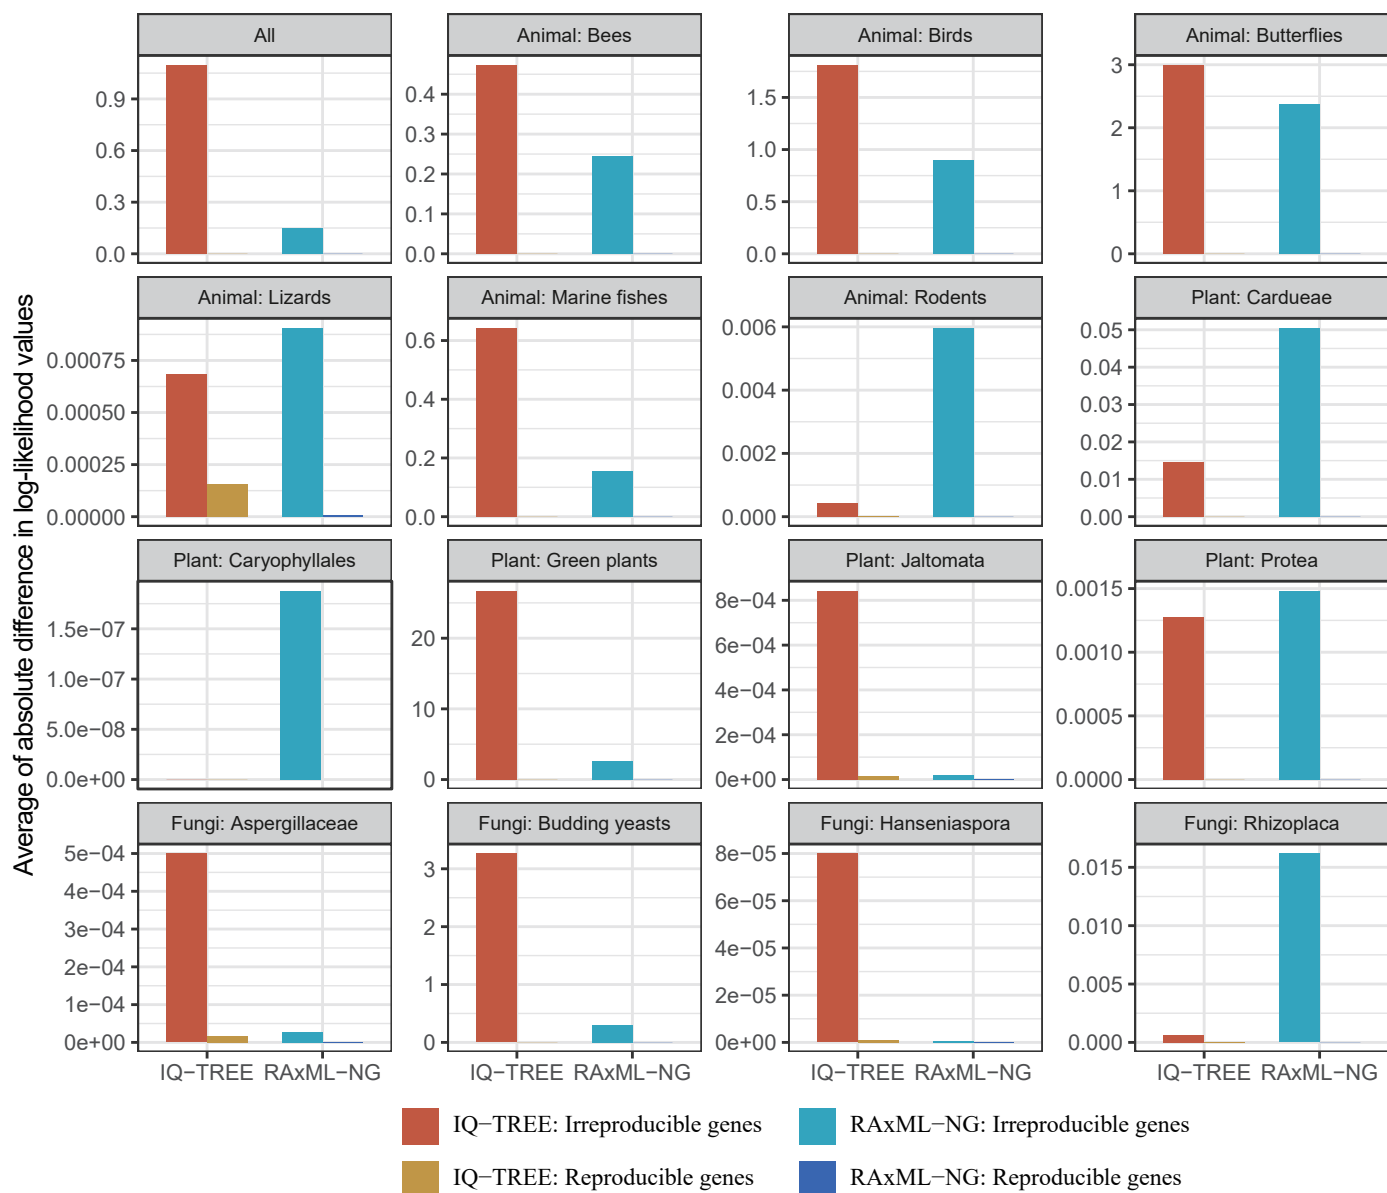

**Supplementary Figure 6. Average absolute difference in log-likelihood values between Run1 and Run2 replicates of 19,414 genes in 15 phylogenomic datasets.** For each gene, we calculated the absolute difference in log-likelihood values between Run1 and Run2 replicates. Bar plot at upper left is based on all 19,414 genes from 15 phylogenomic datasets. All other bar plots show the results for each of the 15 phylogenomic datasets. Genes yielding irreproducible phylogenies are colored in red and genes yielding reproducible phylogenies are colored in yellow when using IQ-TREE; genes yielding irreproducible phylogenies are colored in green and genes yielding reproducible phylogenies are colored in blue when using RAxML-NG. Detailed values are given in Supplementary Data 2.

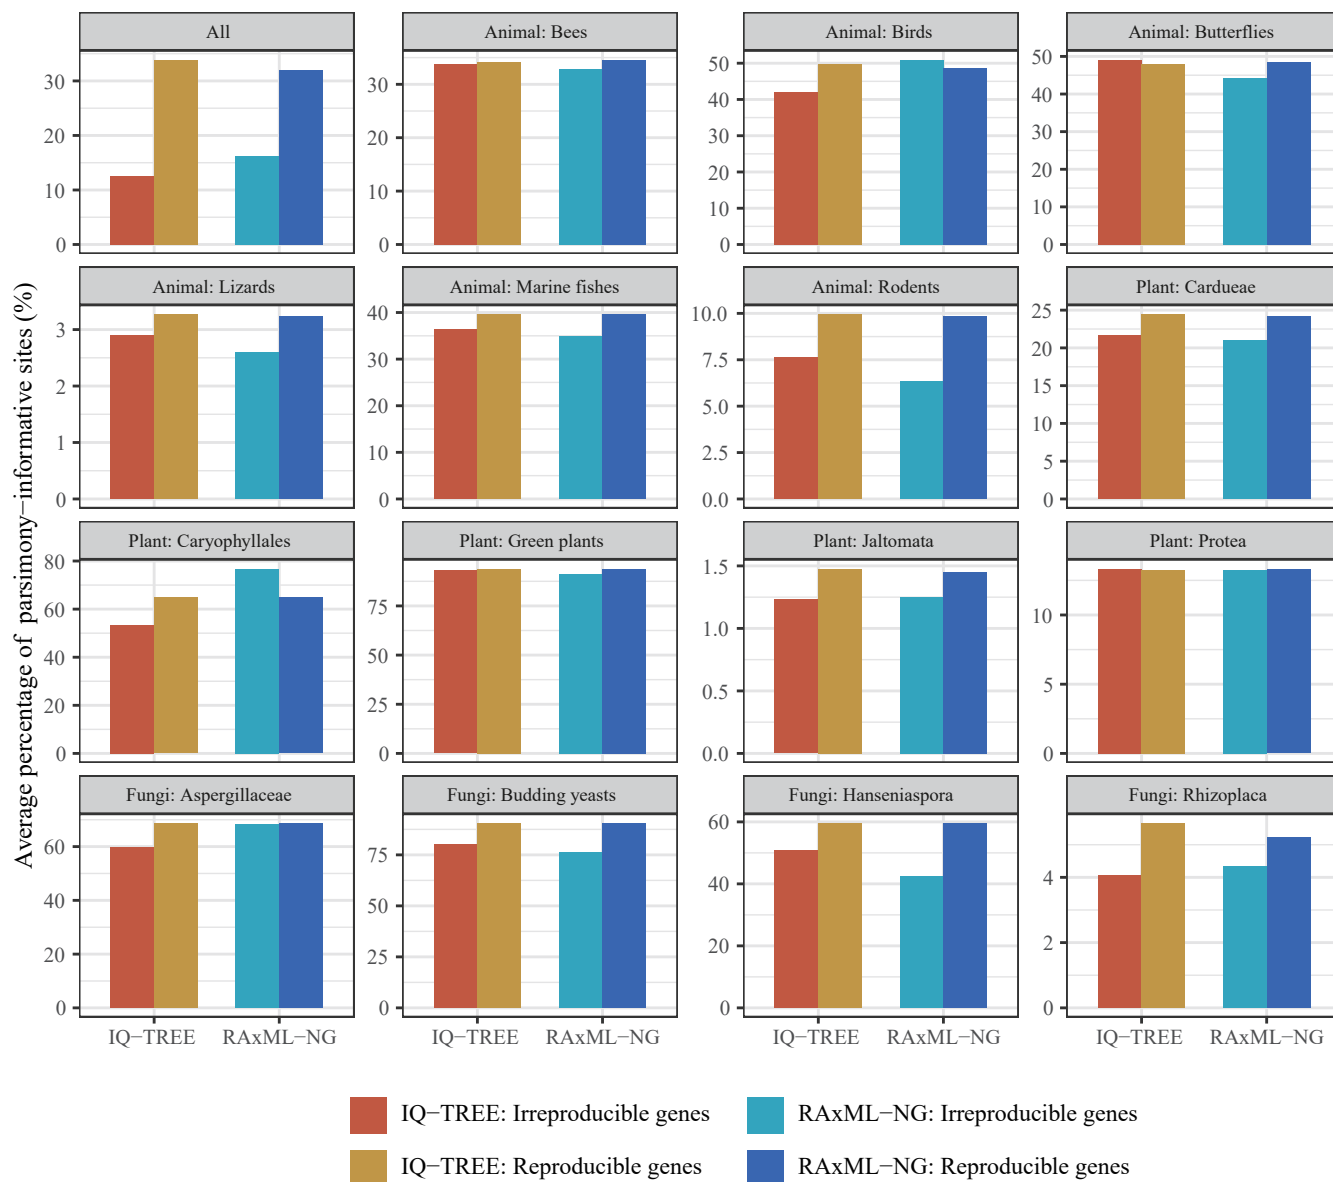

**Supplementary Figure 7. Average percentage of parsimony-informative sites of 19,414 genes in 15 phylogenomic datasets** Bar plot at upper left is based on all 19,414 genes from 15 phylogenomic datasets. All other bar plots show the results for each of the 15 phylogenomic datasets. Genes yielding irreproducible phylogenies are colored in red and genes yielding reproducible phylogenies are colored in yellow when using IQ-TREE; genes yielding irreproducible phylogenies are colored in green and genes yielding reproducible phylogenies are colored in blue when using RAxML-NG. Detailed values are given in Supplementary Data 2.

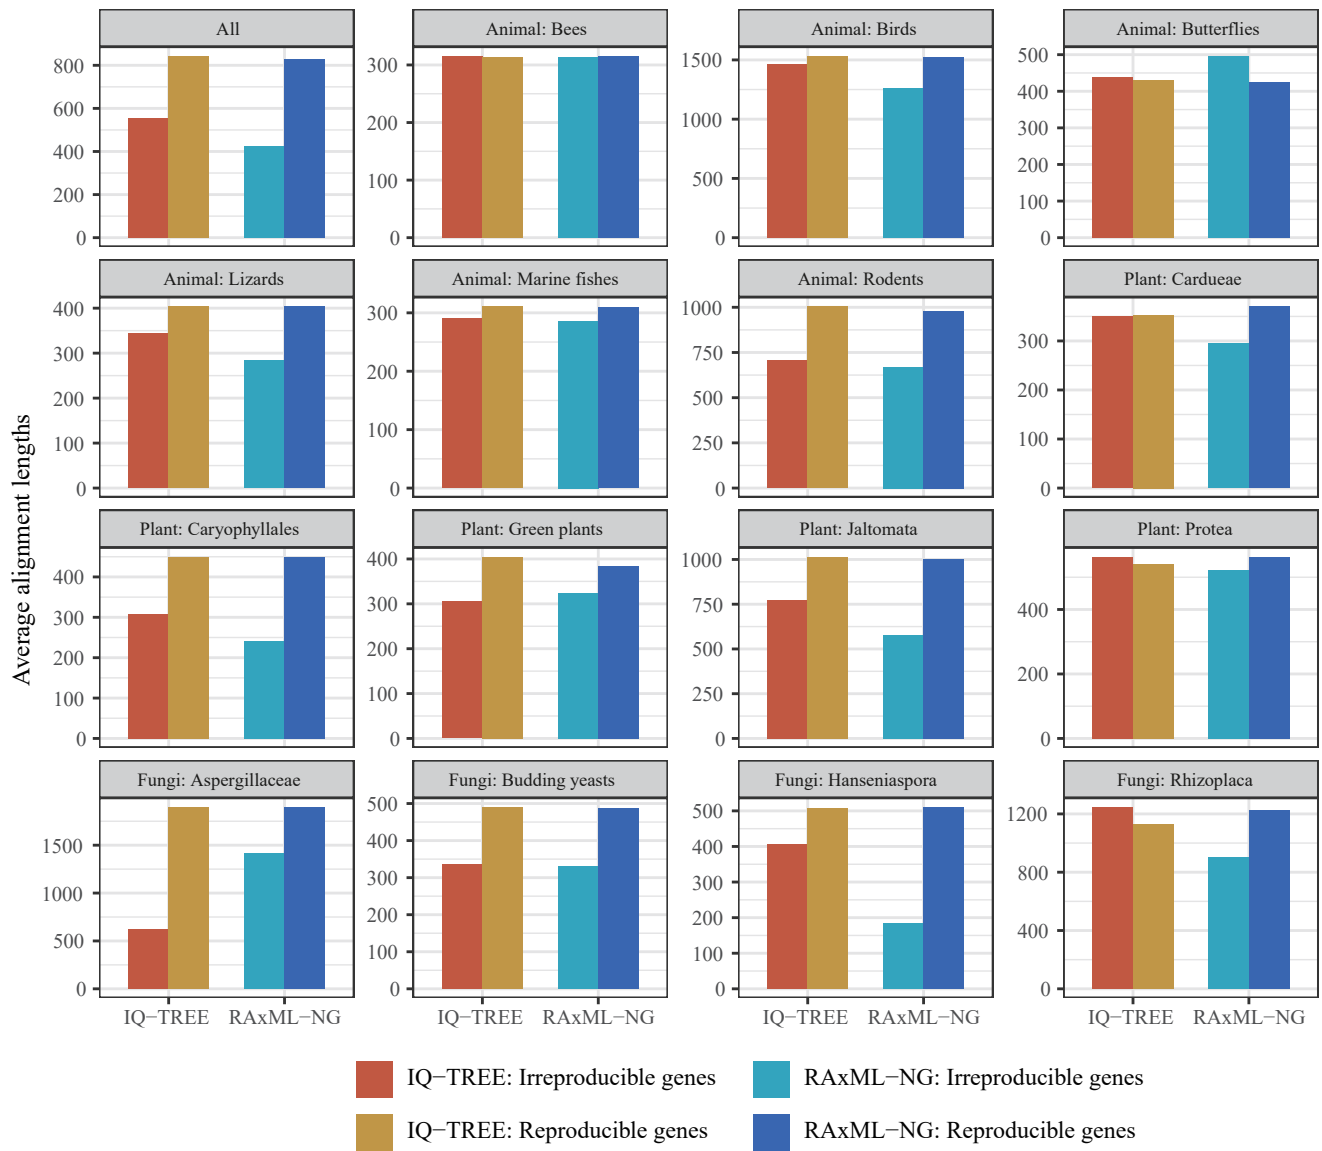

**Supplementary Figure 8. Average alignment length in 15 phylogenomic datasets** Bar plot at upper left is based on all 19,414 genes from 15 phylogenomic datasets. All other bar plots show the results for each of the 15 phylogenomic datasets. Genes yielding irreproducible phylogenies are colored in red and genes yielding reproducible phylogenies are colored in yellow when using IQ-TREE; genes yielding irreproducible phylogenies are colored in green and genes yielding reproducible phylogenies are colored in blue when using RAxML-NG. Detailed values are given in Supplementary Data 2.

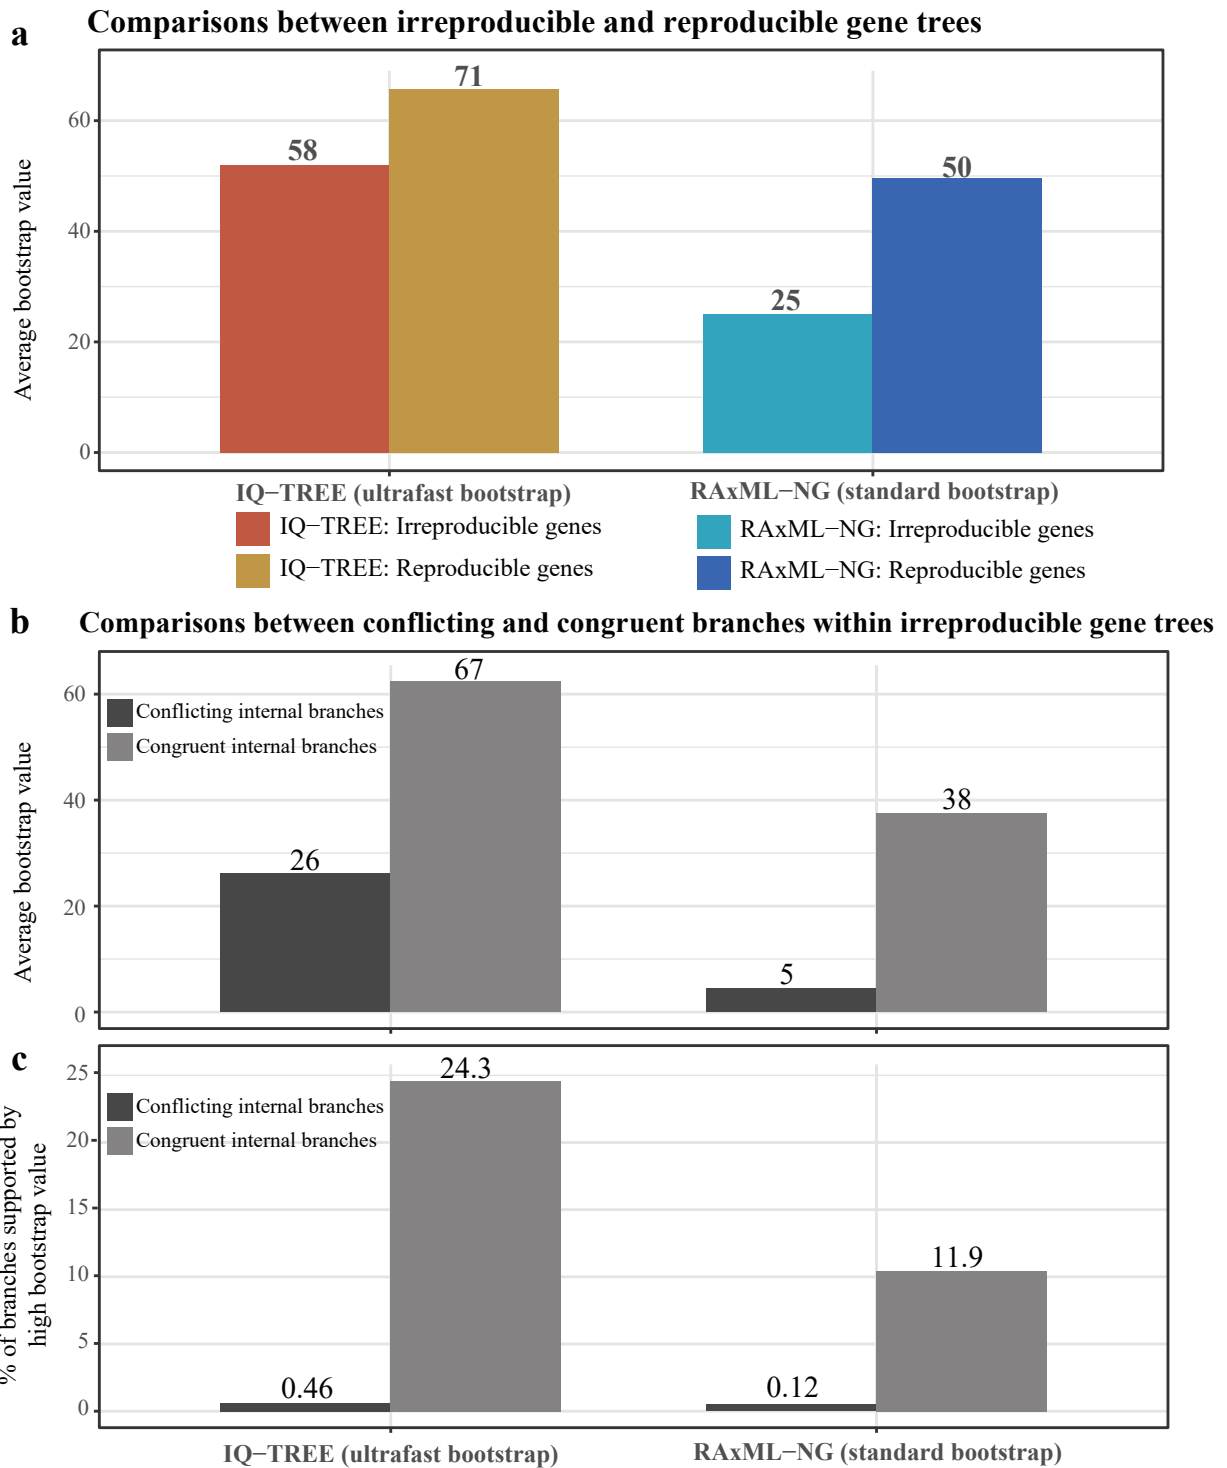

**Supplementary Figure 9. Comparisons of bootstrap support values between genes that yield irreproducible phylogenies and reproducible ones.** Since assessing bootstrap support for all gene trees is computationally intractable, we sampled the first 100 genes from each of 15 phylogenomic datasets. Using IQ-TREE, 410 / 1,500 (27.3%) gene alignments yielded irreproducible phylogenies between two replicates, while the remaining 1,090 / 1,500 (72.7%) yielded reproducible phylogenies. Using RAxML-NG, 183 / 1,500 (12.2 %) genes yielded irreproducible phylogenies between two replicates (green bars), while 1,317 / 1,500 (87.8%) yielded reproducible phylogenies. For the sets of reproducible and irreproducible genes in IQ-TREE and RAxML-NG analyses, (a) shows overall mean bootstrap values. For the irreproducible genes in IQ-TREE and RAxML-NG analyses, we assessed (b) bootstrap support values of conflicting internal branches and congruent internal branches within irreproducible genes (i.e., genes that yield two topologically different trees in Run1 and Run2); we also examined (c) percentage of internal branches strongly supported by rapid bootstrap value of  $\geq 95$  in IQ-TREE analyses and standard bootstrap value of  $\geq 70$  in RAxML-NG analyses. All 77,656 analyses (19,414 alignments \* 2 replicates \* 2 ML programs) were run using 2 threads per node on the Center for High Throughput Computing (CHTC) at the University of Wisconsin-Madison.



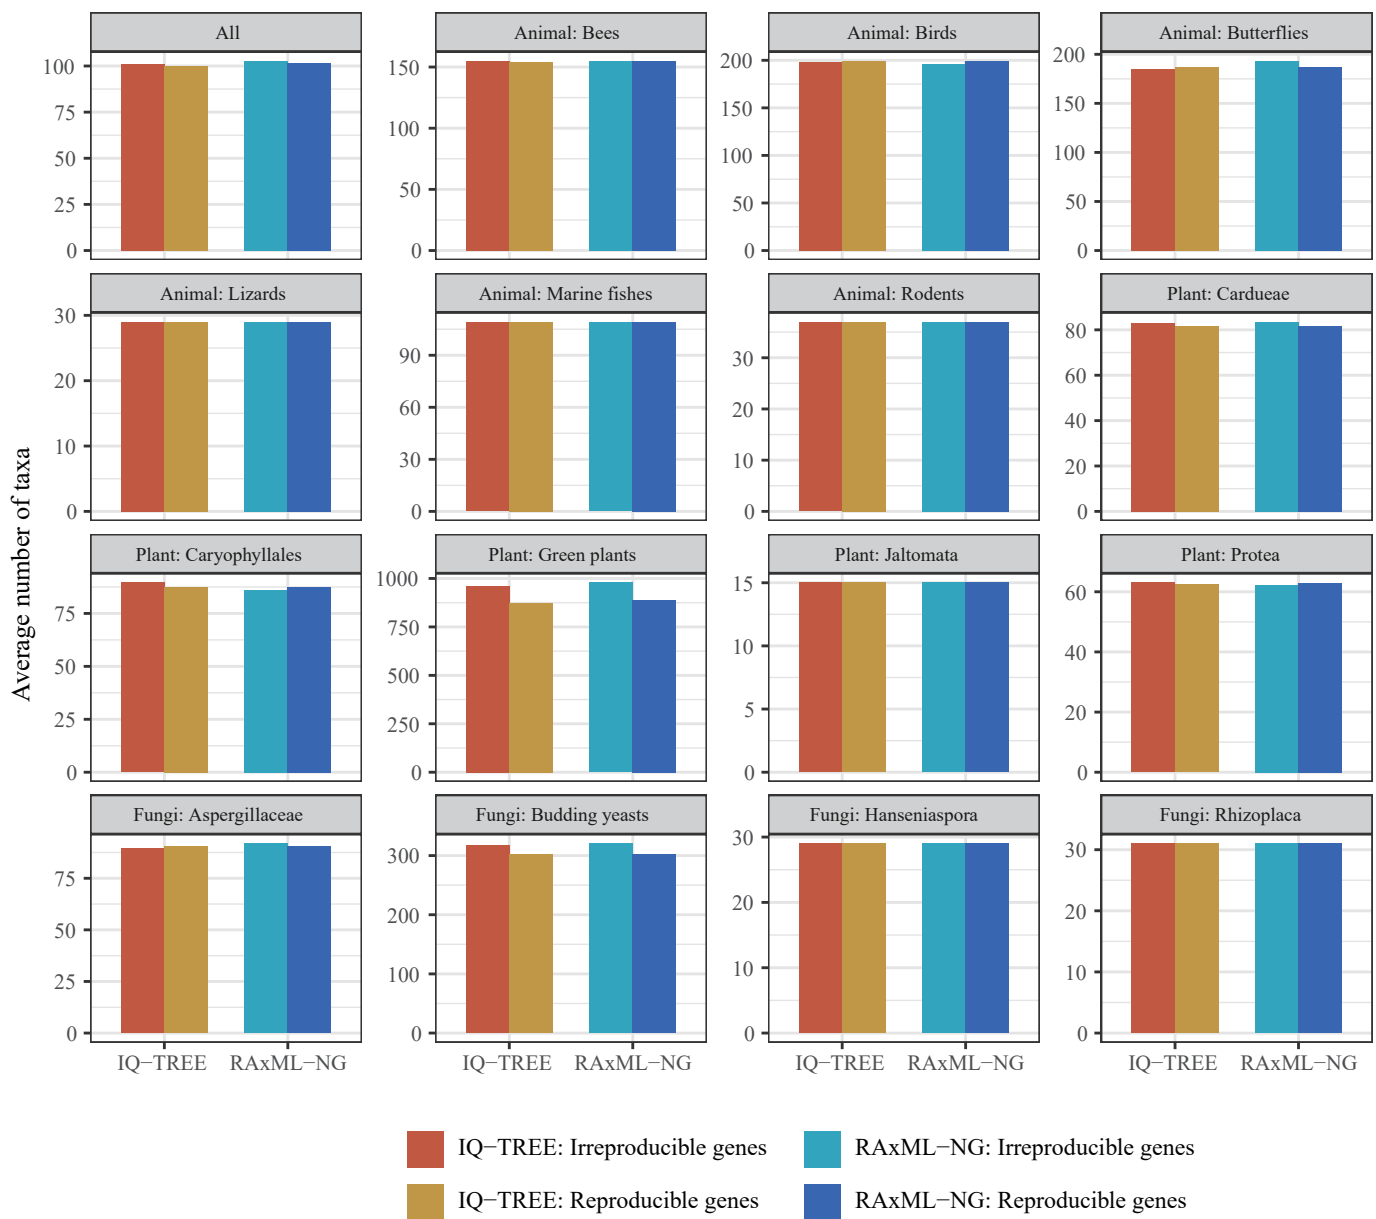

**Supplementary Figure 10. Average number of taxa in 15 phylogenomic datasets** Bar plot at upper left is based on all 19,414 genes from 15 phylogenomic datasets. All other bar plots show the results for each of the 15 phylogenomic datasets. Genes yielding irreproducible phylogenies are colored in red and genes yielding reproducible phylogenies are colored in yellow when using IQ-TREE; genes yielding irreproducible phylogenies are colored in green and genes yielding reproducible phylogenies are colored in blue when using RAxML-NG. Detailed values are given in Supplementary Data 2.

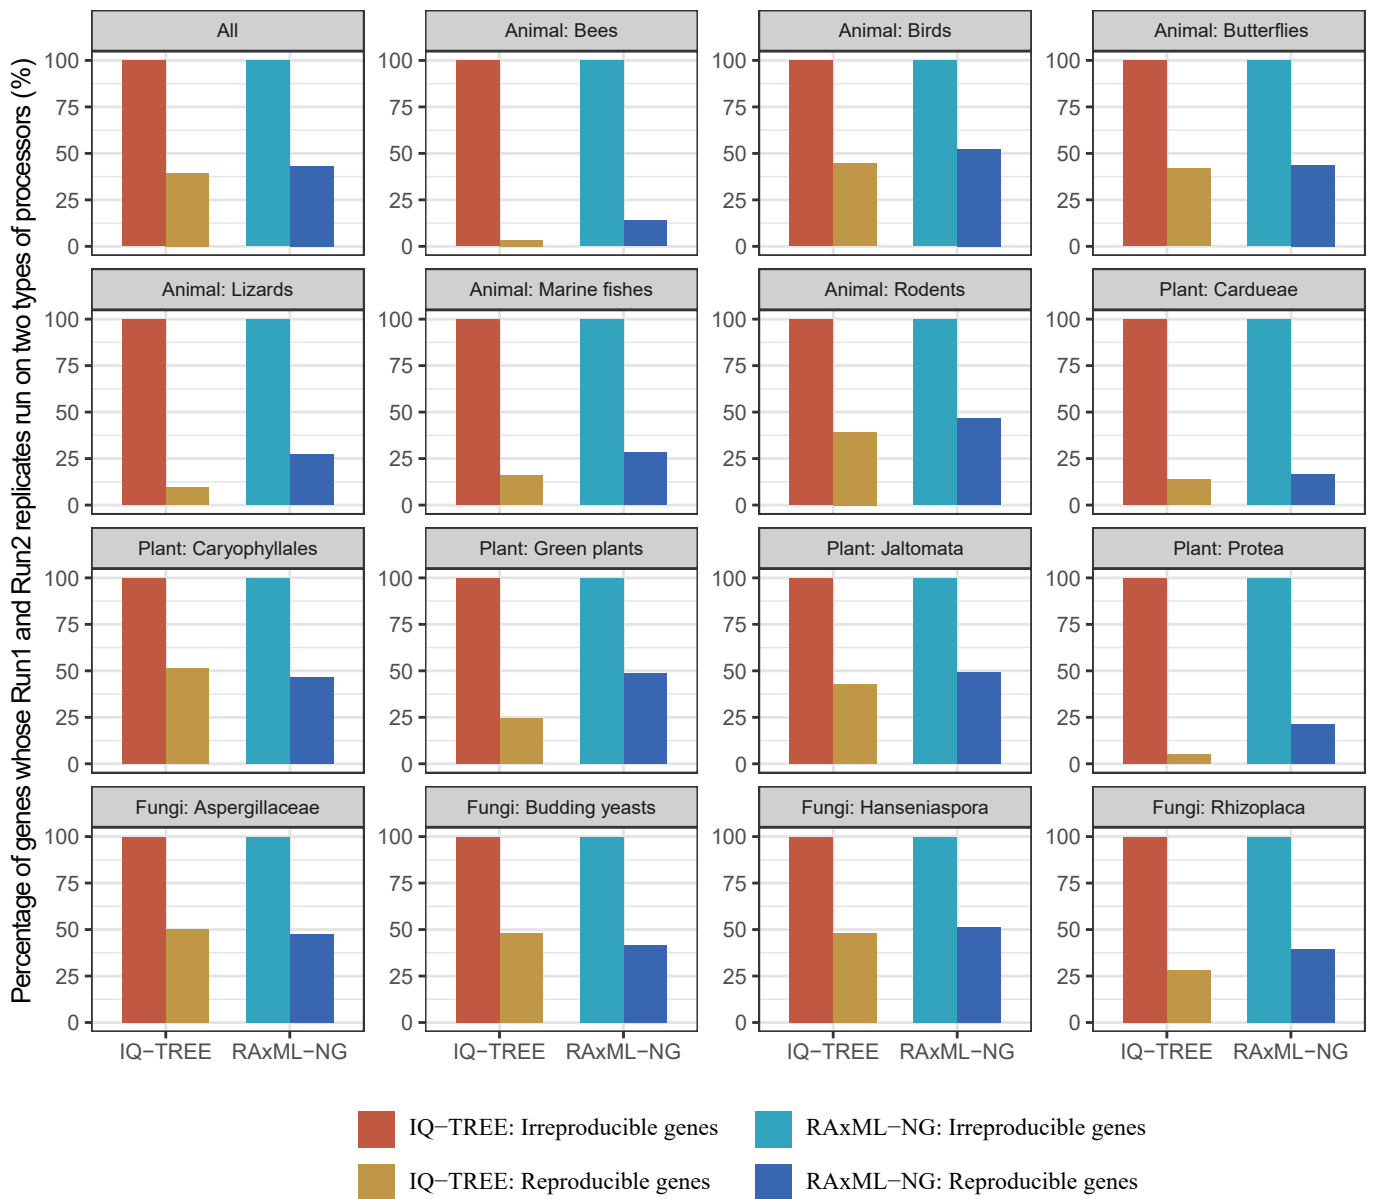

**Supplementary Figure 11. Percentage of genes whose Run1 and Run2 replicates run on two types of processors.** ML programs can automatically detect the optimal vector instructions. Two replicates (Run1 and Run2) for a given gene may be executed on two different types of processors in a supercomputing cluster. Bar plot at upper left is based on all 19,414 genes from 15 phylogenomic datasets. All other bar plots show the results for each of the 15 phylogenomic datasets. Genes yielding irreproducible phylogenies are colored in red and genes yielding reproducible phylogenies are colored in yellow when using IQ-TREE; genes yielding irreproducible phylogenies are colored in green and genes yielding reproducible phylogenies are colored in blue when using RAxML-NG. Detailed values are given in Supplementary Data 2.

**Supplementary Figure 12. Coalescence-based ASTRAL trees for 15 phylogenomic datasets.** For each of 15 datasets, we inferred four sets (iqtree\_run1, iqtree\_run2, raxml\_ng\_run1, and raxml\_ng\_run2) of individual gene trees using IQ-TREE and RAxML-NG and then built coalescent-based species trees with ASTRAL-III. The reliability of each internal branch was evaluated using local posterior probability (LPP). We visualized phylogenetic trees using the R package ggtree. Only support values smaller than 100% are shown for all species phylogenies (see command lines for inferring coalescence-based ASTRAL tree in the Supplementary Note 1). Red nodes indicate species relationships that differ between the species phylogeny inferred from Run1 trees and the species phylogeny inferred from Run2 trees. We found that 9 / 15 phylogenomic datasets produced topologically different coalescent-based species phylogenies from the Run1 and Run2 sets of individual gene trees, with the percentage of conflicting bipartitions ranging from 0.68% to 14.52%.

- ASTRAL tree (iqtree\_run1\_ASTRAL) at the **upper left** is the coalescence-based species phylogeny inferred from all of gene trees (run1) with IQ-TREE.
- ASTRAL tree (iqtree\_run2\_ASTRAL) at the **upper right** is the coalescence-based species phylogeny inferred from all of gene trees (run2) with IQ-TREE.
- ASTRAL tree (raxml\_ng\_run1\_ASTRAL) at the **bottom left** is the coalescence-based species phylogeny inferred from all of gene trees (run1) with RAxML-NG.
- ASTRAL tree (raxml\_ng\_run2\_ASTRAL) at the **bottom right** is the coalescence-based species phylogeny inferred from all of gene trees (run2) with RAxML-NG.

To see how single gene trees affected the downstream analysis, we compared ASTRAL trees between run1 and run2 and colored the conflicting internal branches in red.

| Order | Dataset               | Study          | Program  | Conflicting bipartitions (%) <sup>a</sup> | Highly conflicting bipartitions (%) <sup>b</sup> |
|-------|-----------------------|----------------|----------|-------------------------------------------|--------------------------------------------------|
| 1     | Animal: Bees          | Bees           | IQ-TREE  | 8.5561497                                 | 1.6042781                                        |
| 1     | Animal: Bees          | Bees           | RAxML-NG | 10.160428                                 | 3.4759358                                        |
| 2     | Animal: Birds         | Birds          | IQ-TREE  | 1.5228426                                 | 0                                                |
| 2     | Animal: Birds         | Birds          | RAxML-NG | 1.5228426                                 | 0                                                |
| 3     | Animal: Butterflies   | Butterflys     | IQ-TREE  | 4.4117647                                 | 1.2254902                                        |
| 3     | Animal: Butterflies   | Butterflys     | RAxML-NG | 1.9607843                                 | 0                                                |
| 4     | Animal: Lizards       | Lizards        | IQ-TREE  | 3.8461538                                 | 0                                                |
| 4     | Animal: Lizards       | Lizards        | RAxML-NG | 0                                         | 0                                                |
| 5     | Animal: Marine fishes | Marine_fishes  | IQ-TREE  | 4.2735043                                 | 0                                                |
| 5     | Animal: Marine fishes | Marine_fishes  | RAxML-NG | 6.8376068                                 | 0                                                |
| 6     | Animal: Rodents       | Rodents        | IQ-TREE  | 0                                         | 0                                                |
| 6     | Animal: Rodents       | Rodents        | RAxML-NG | 0                                         | 0                                                |
| 7     | Plant: Cardueae       | Cardueae       | IQ-TREE  | 4.8780488                                 | 1.2195122                                        |
| 7     | Plant: Cardueae       | Cardueae       | RAxML-NG | 3.6585366                                 | 0                                                |
| 8     | Plant: Caryophyllales | Caryophyllales | IQ-TREE  | 0                                         | 0                                                |
| 8     | Plant: Caryophyllales | Caryophyllales | RAxML-NG | 0                                         | 0                                                |
| 9     | Plant: Green plants   | Green_plants   | IQ-TREE  | 1.7879949                                 | 0.0425713                                        |
| 9     | Plant: Green plants   | Green_plants   | RAxML-NG | 0.6808511                                 | 0.1276596                                        |
| 10    | Plant: Jaltomata      | Jaltomata      | IQ-TREE  | 0                                         | 0                                                |
| 10    | Plant: Jaltomata      | Jaltomata      | RAxML-NG | 0                                         | 0                                                |
| 11    | Plant: Protea         | Protea         | IQ-TREE  | 14.516129                                 | 5.6451613                                        |
| 11    | Plant: Protea         | Protea         | RAxML-NG | 8.0645161                                 | 2.4193548                                        |
| 12    | Fungi: Aspergillaceae | Aspergillaceae | IQ-TREE  | 0                                         | 0                                                |
| 12    | Fungi: Aspergillaceae | Aspergillaceae | RAxML-NG | 0                                         | 0                                                |
| 13    | Fungi: Budding yeasts | Budding_yeasts | IQ-TREE  | 0                                         | 0                                                |
| 13    | Fungi: Budding yeasts | Budding_yeasts | RAxML-NG | 0                                         | 0                                                |
| 14    | Fungi: Hanseniaspora  | Hanseniaspora  | IQ-TREE  | 0                                         | 0                                                |
| 14    | Fungi: Hanseniaspora  | Hanseniaspora  | RAxML-NG | 0                                         | 0                                                |
| 15    | Fungi: Rhizoplaca     | Rhizoplaca     | IQ-TREE  | 10.714286                                 | 0                                                |
| 15    | Fungi: Rhizoplaca     | Rhizoplaca     | RAxML-NG | 3.5714286                                 | 0                                                |

<sup>a</sup> Percentage of conflicting bipartitions between run1 ASTRAL and run2 ASTRAL

<sup>b</sup> Percentage of highly conflicting bipartitions with LPP  $\geq$  90% between run1 ASTRAL and run2 ASTRAL

Bees\_igtree\_run1\_ASTRAL

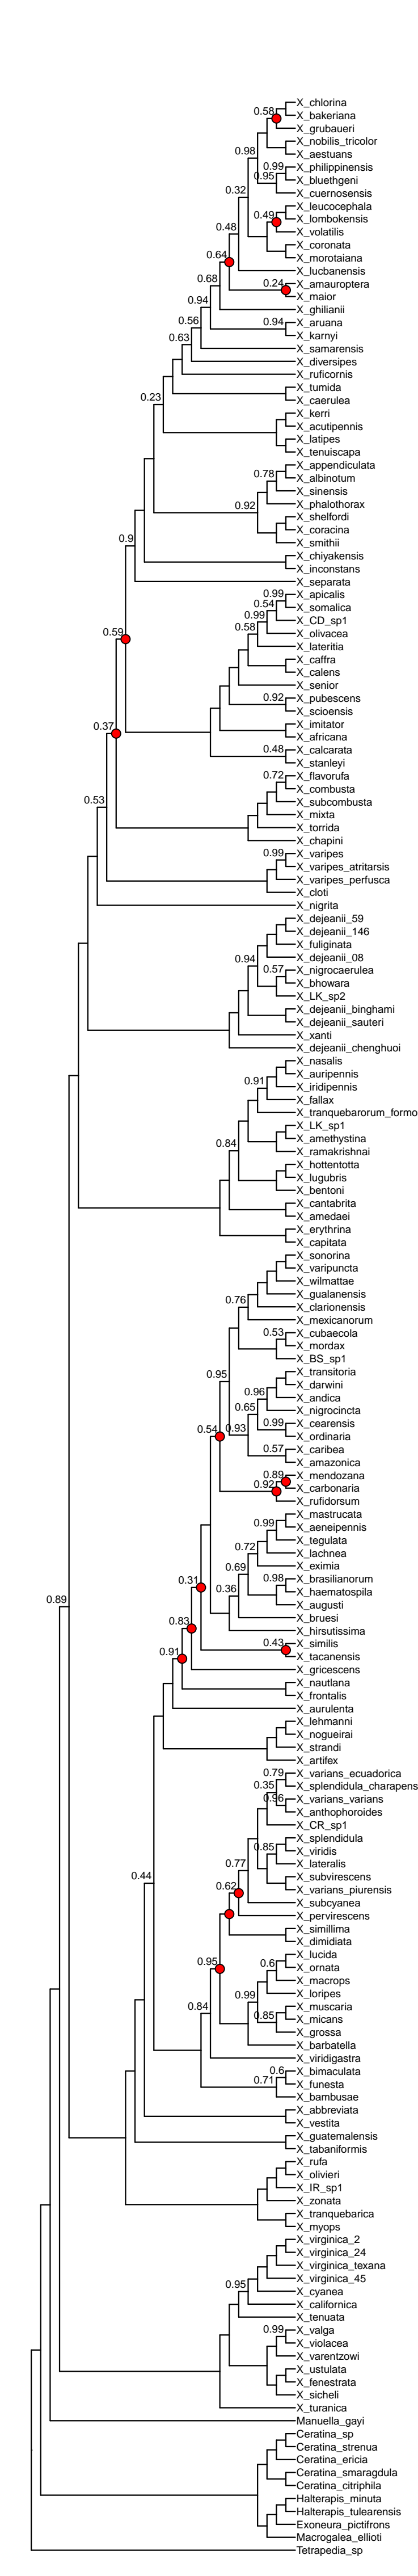

Bees\_igtree\_run2\_ASTRAL

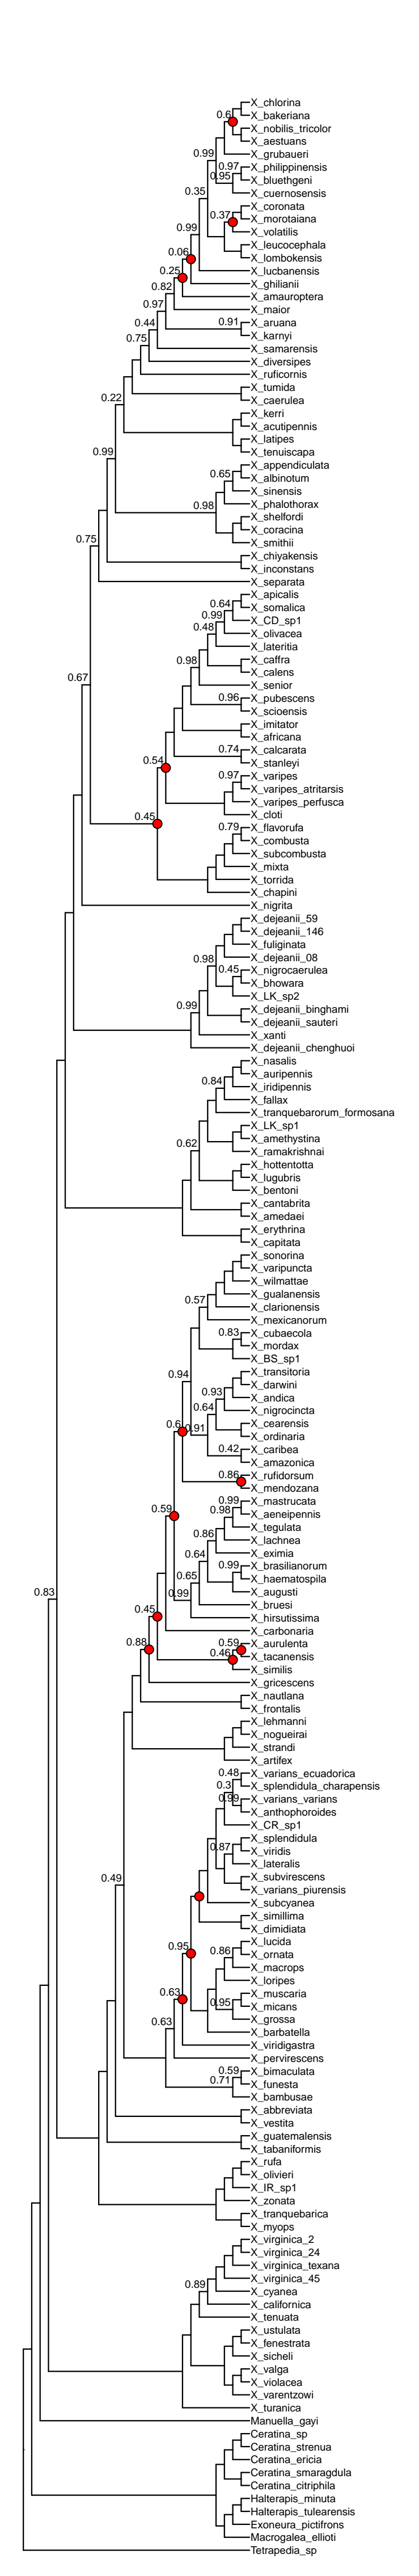

Bees\_raxml\_ng\_run1\_ASTRAL

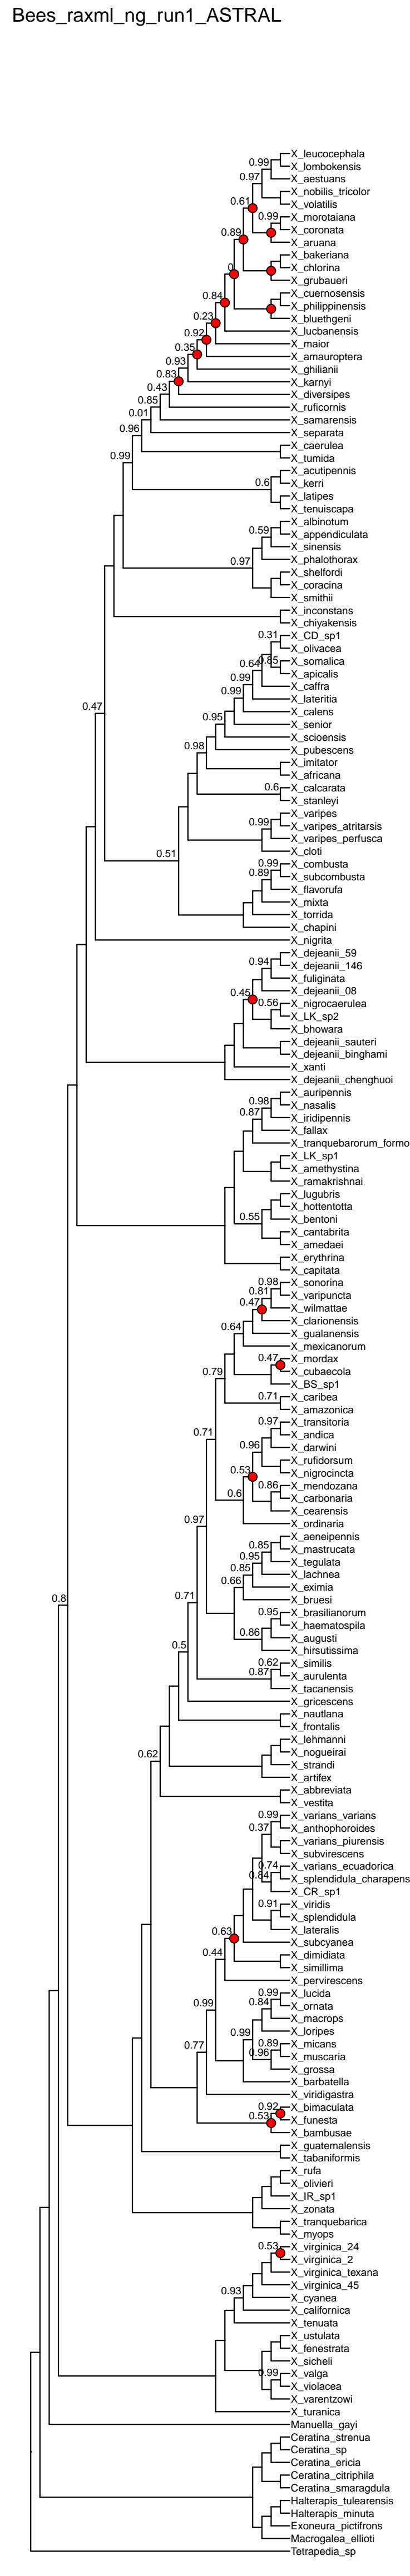

Bees\_raxml\_ng\_run2\_ASTRAL

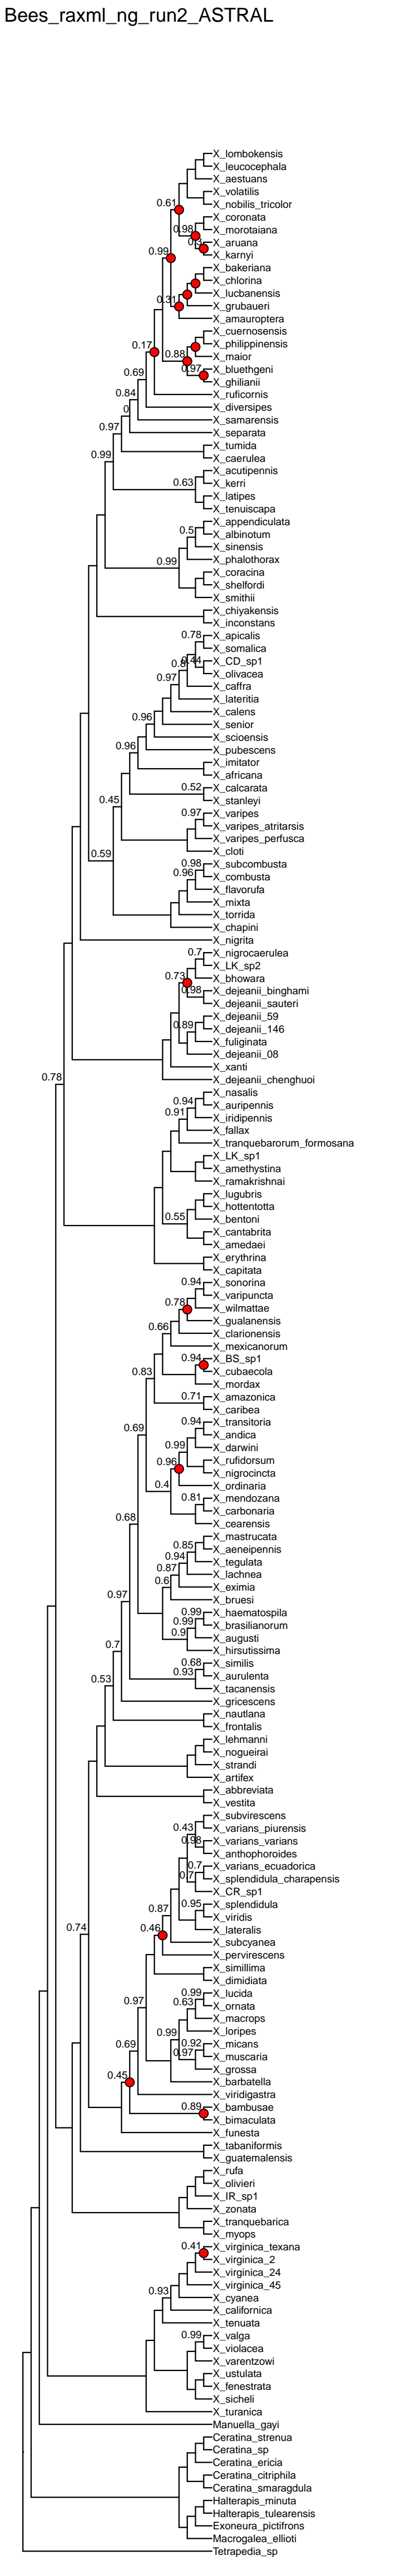



Birds\_iqtree\_run1\_ASTRAL

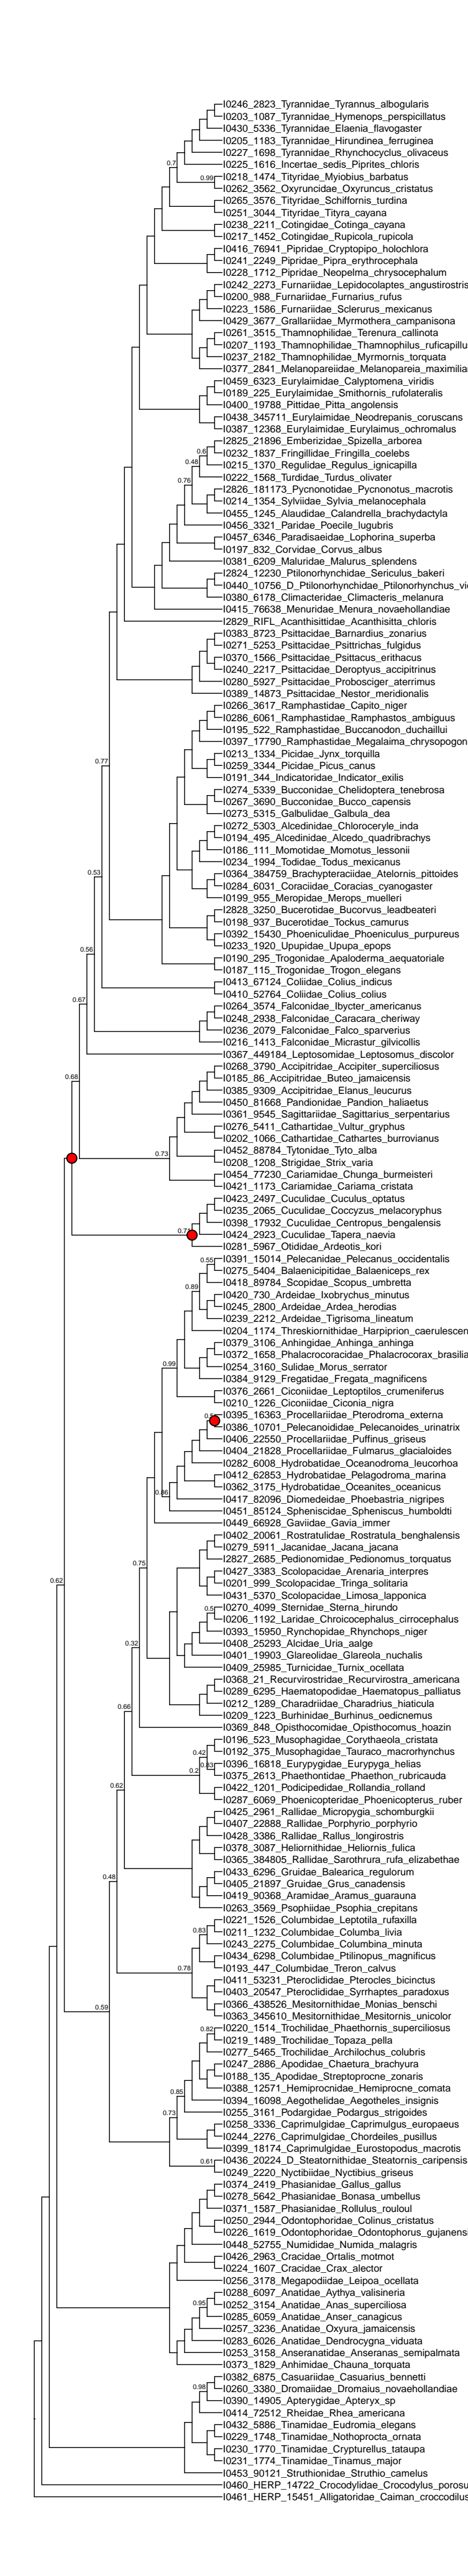

Birds\_iqtree\_run2\_ASTRAL

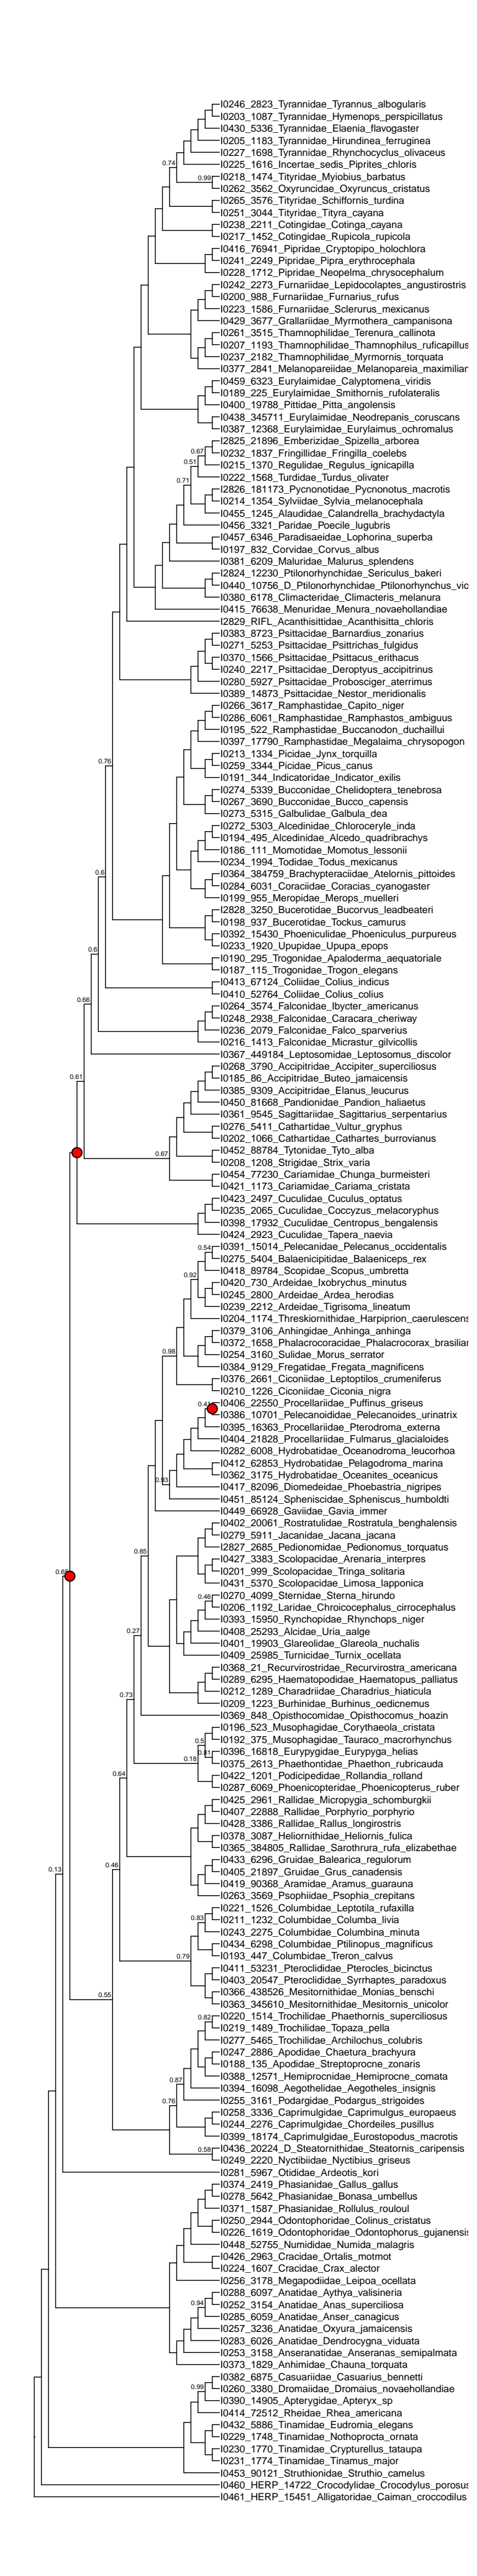

Birds\_raxml\_ng\_run1\_ASTRAL

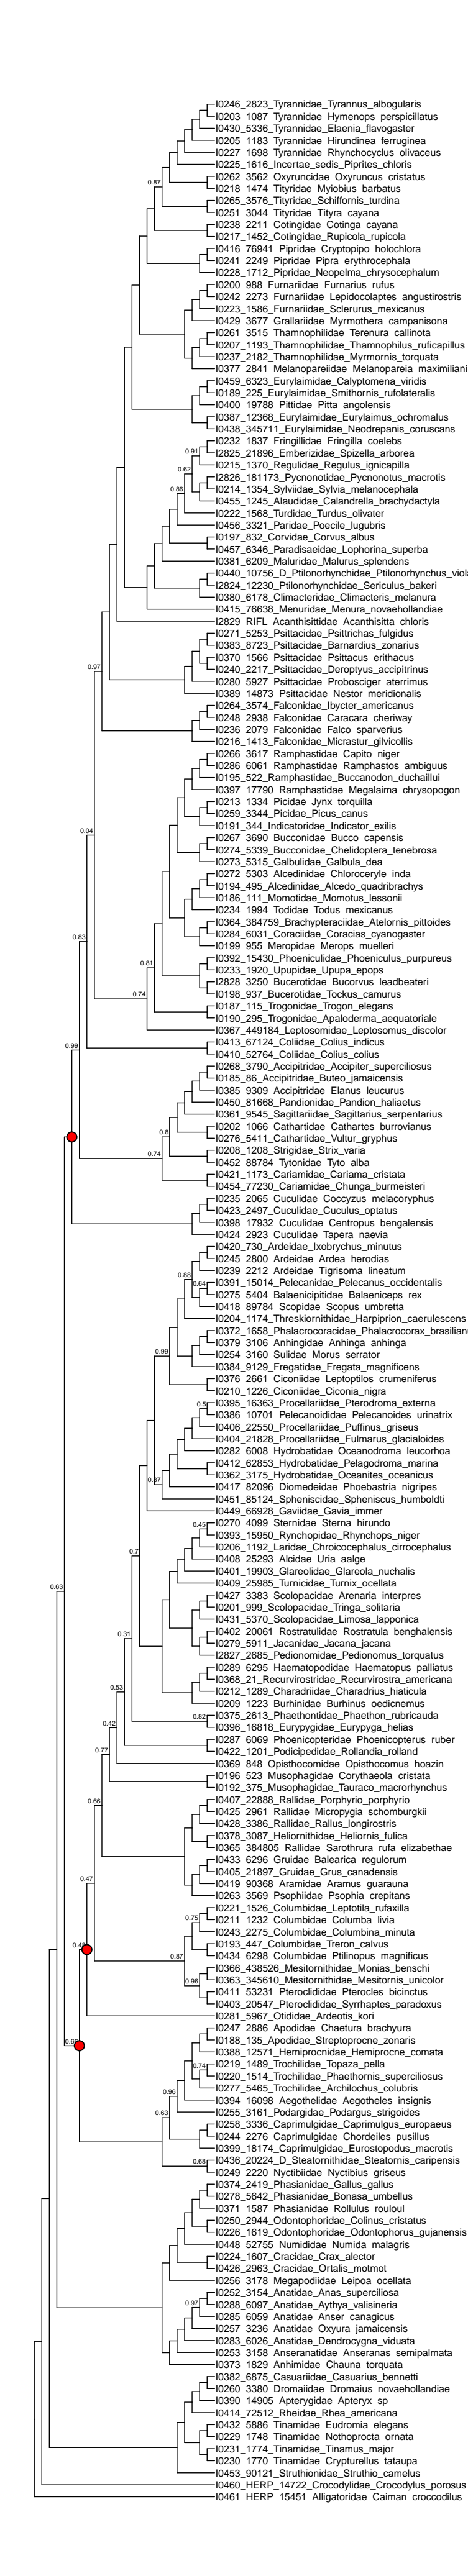

Birds\_raxml\_ng\_run2\_ASTRAL

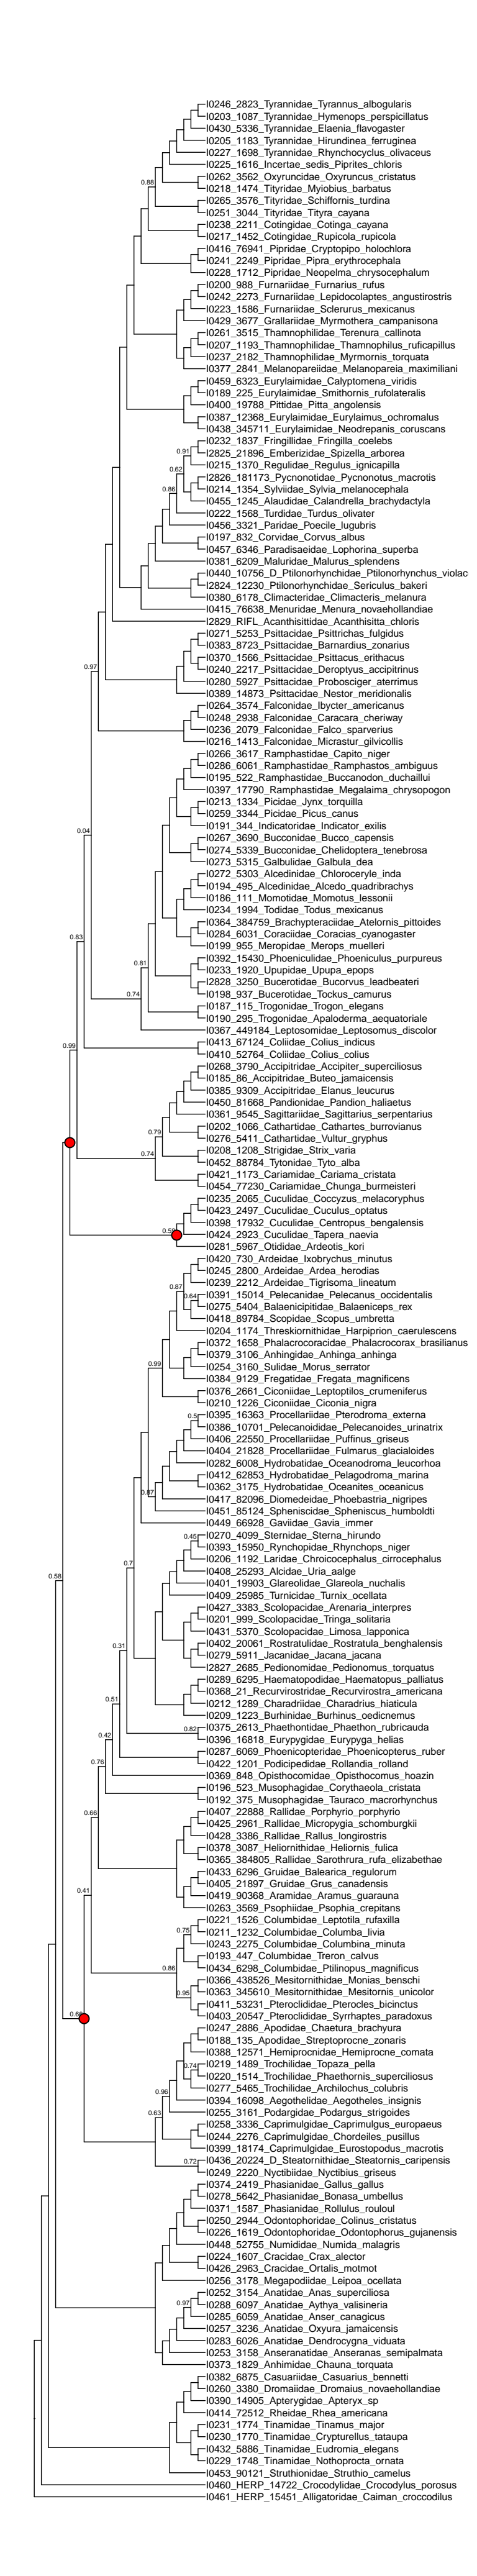



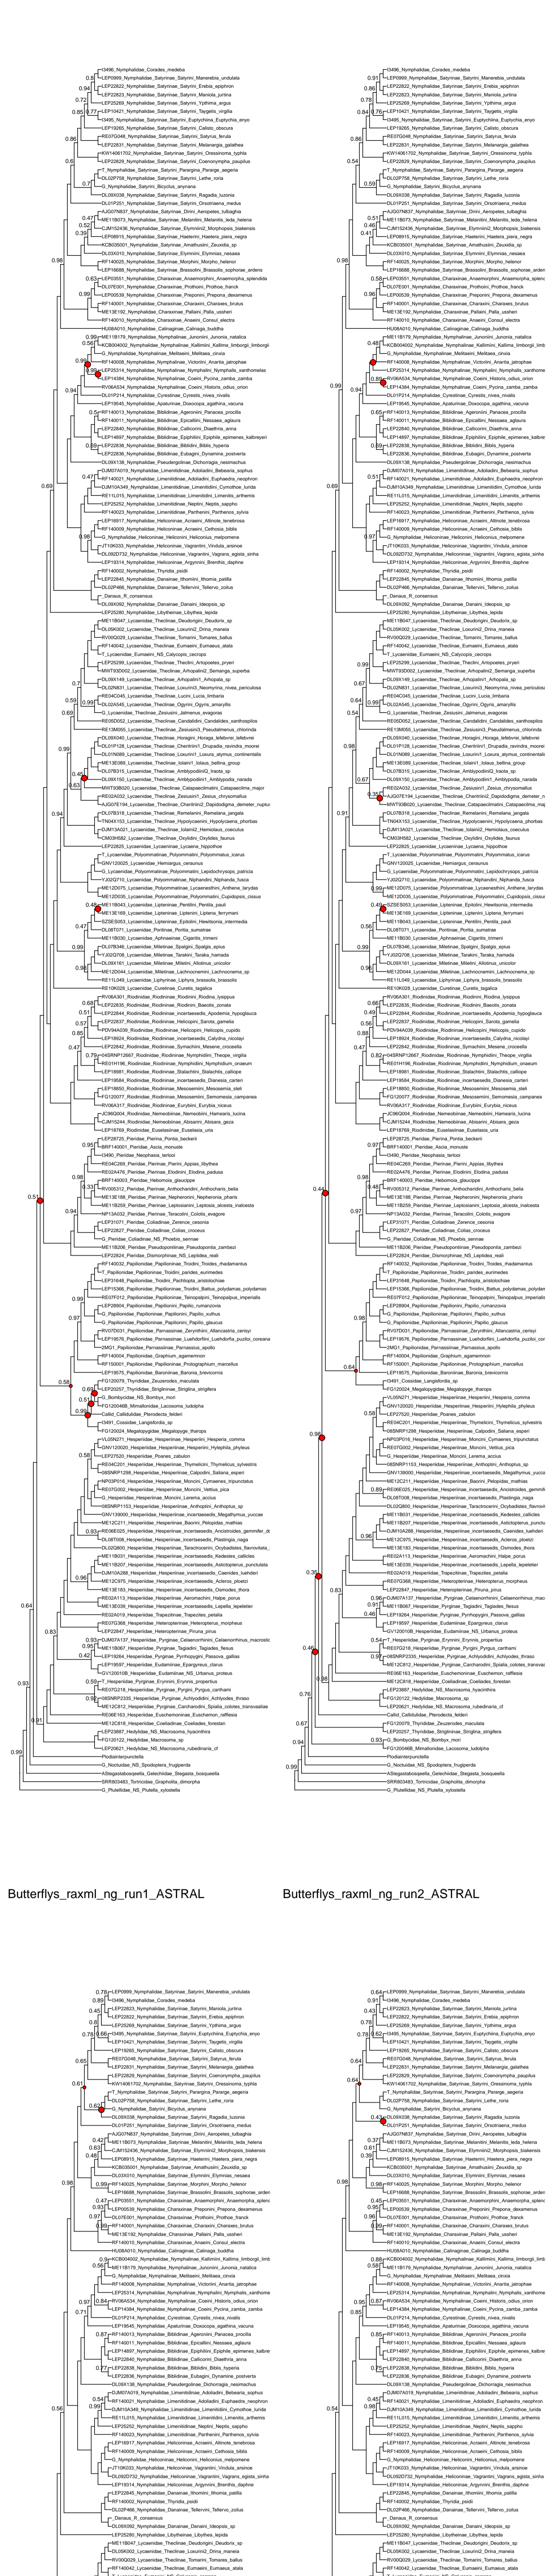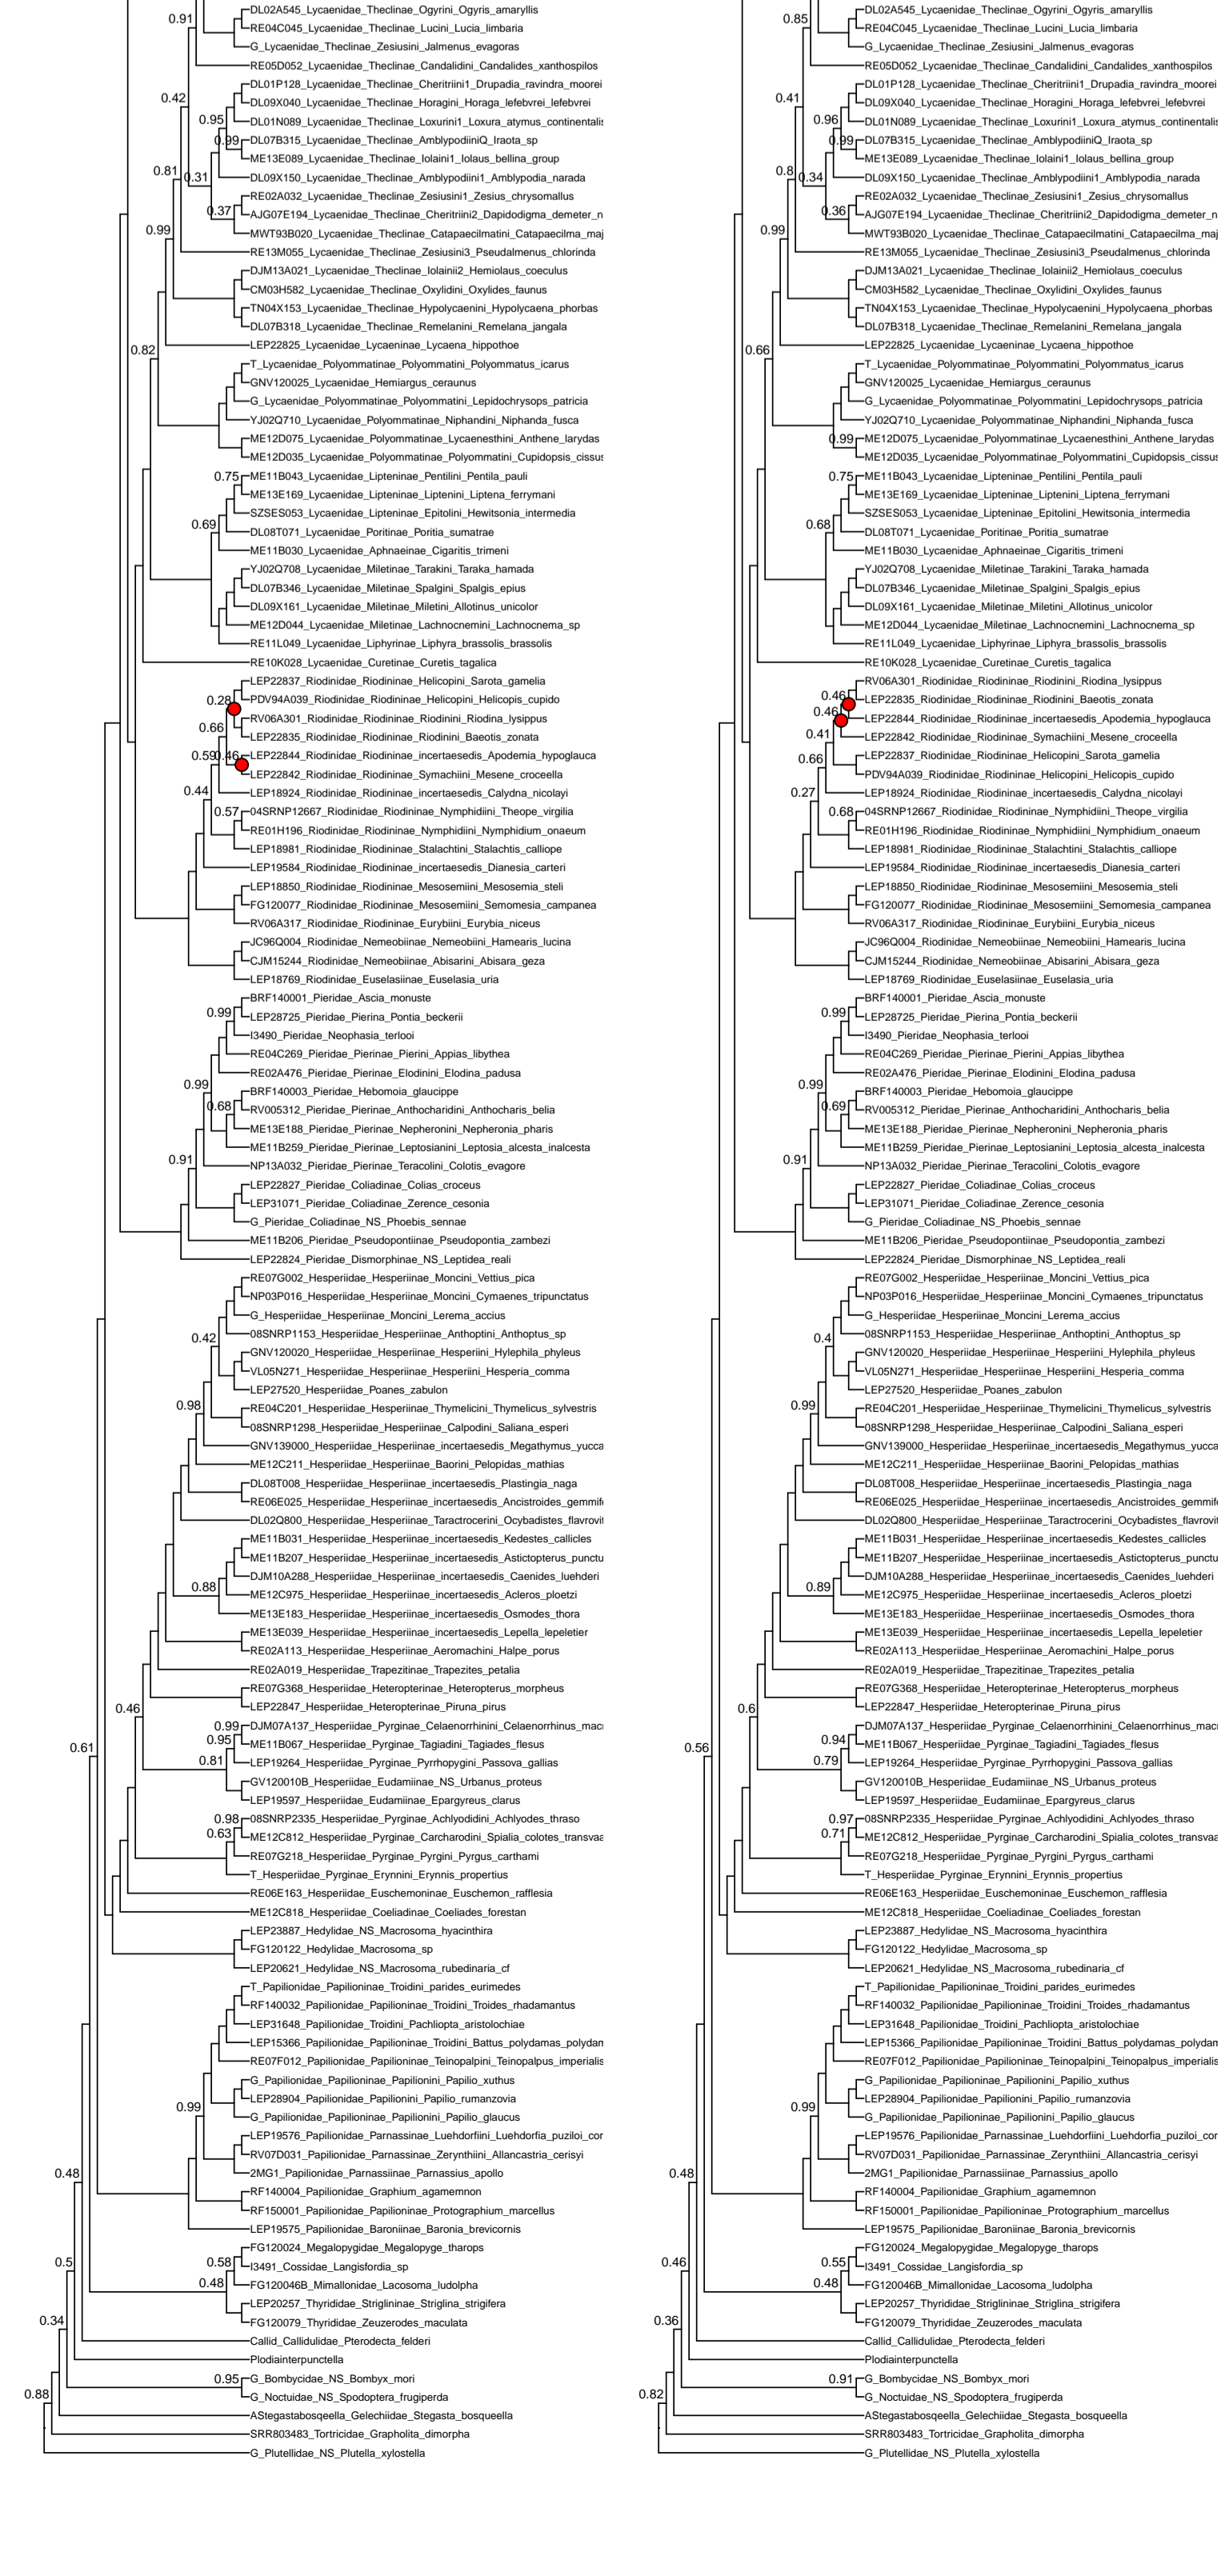

Lizards\_iqtree\_run1\_ASTRAL

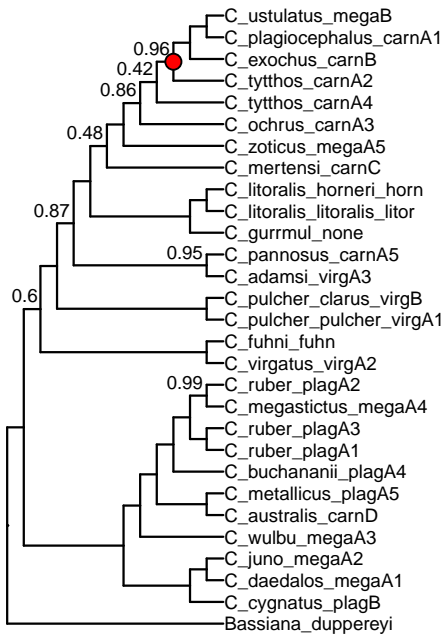

Lizards\_iqtree\_run2\_ASTRAL

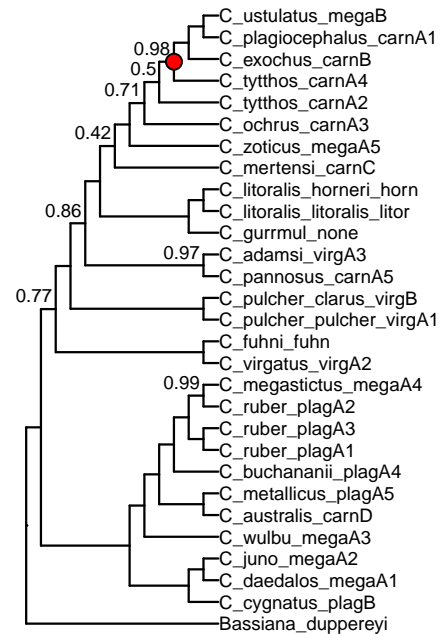

Lizards\_raxml\_ng\_run1\_ASTRAL

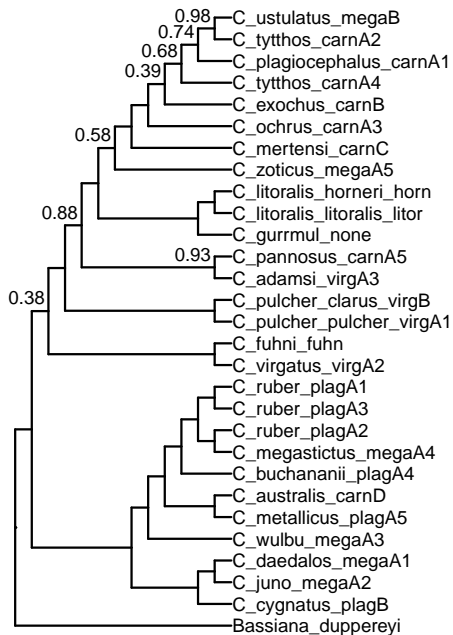

Lizards\_raxml\_ng\_run2\_ASTRAL

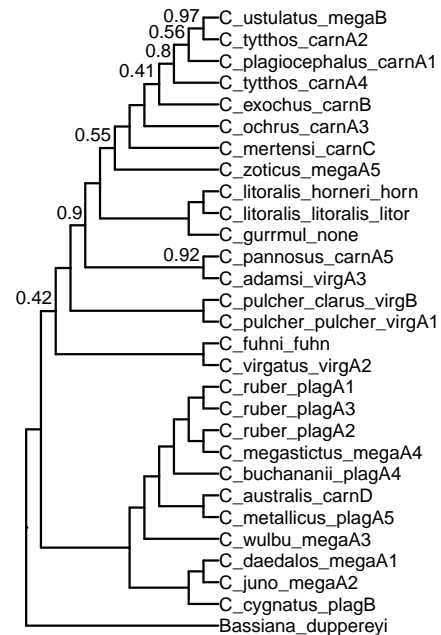







Rodents\_iqtree\_run1\_ASTRAL

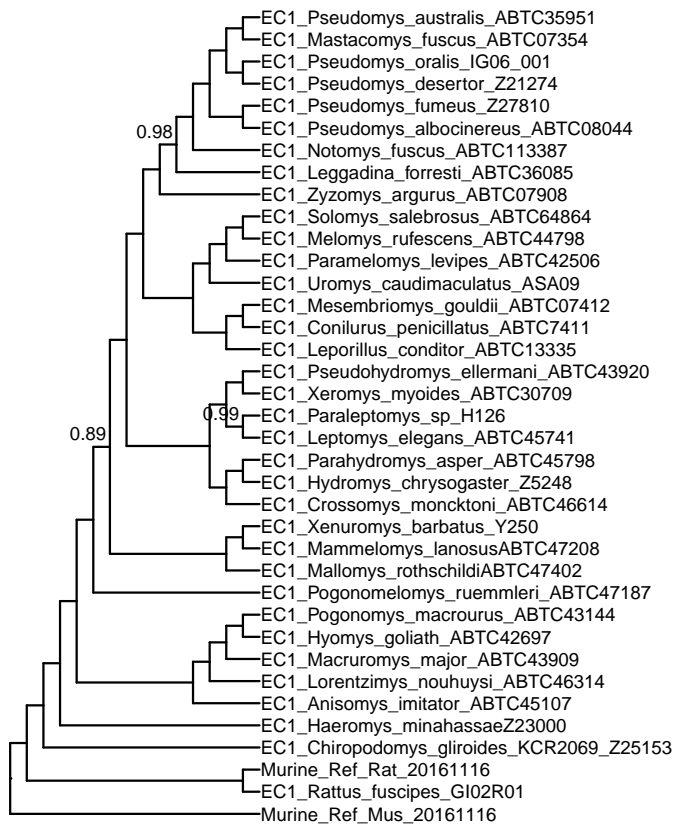

Rodents\_iqtree\_run2\_ASTRAL

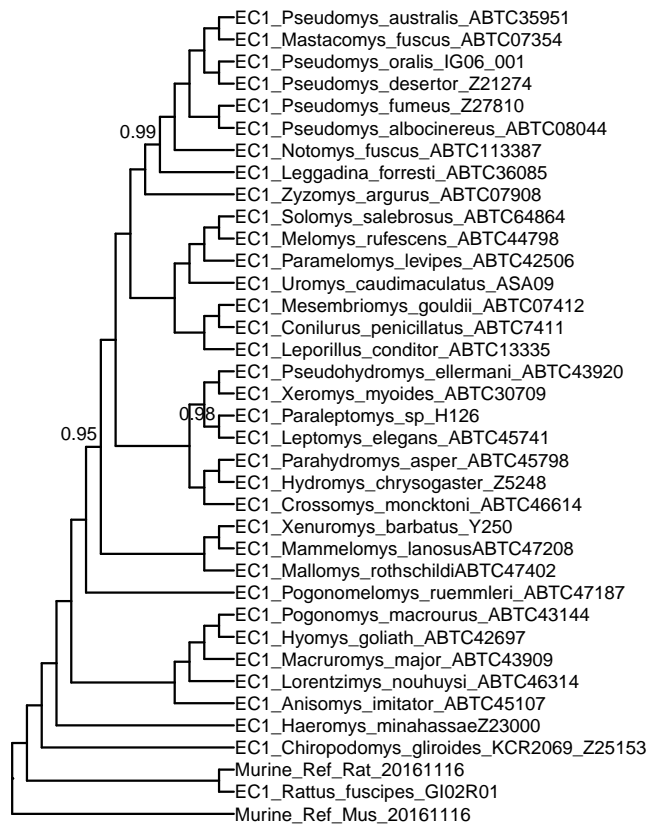

Rodents\_raxml\_ng\_run1\_ASTRAL

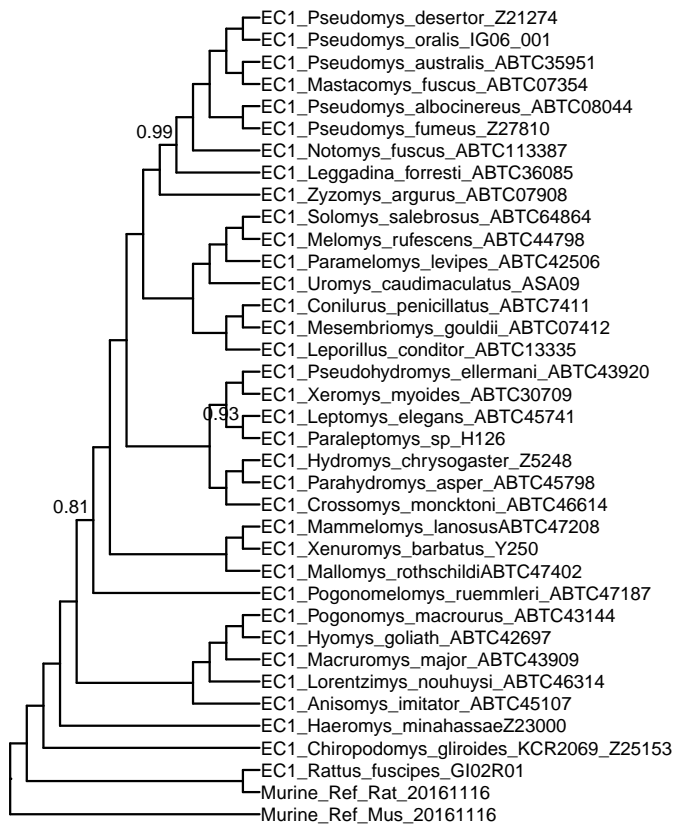

Rodents\_raxml\_ng\_run2\_ASTRAL

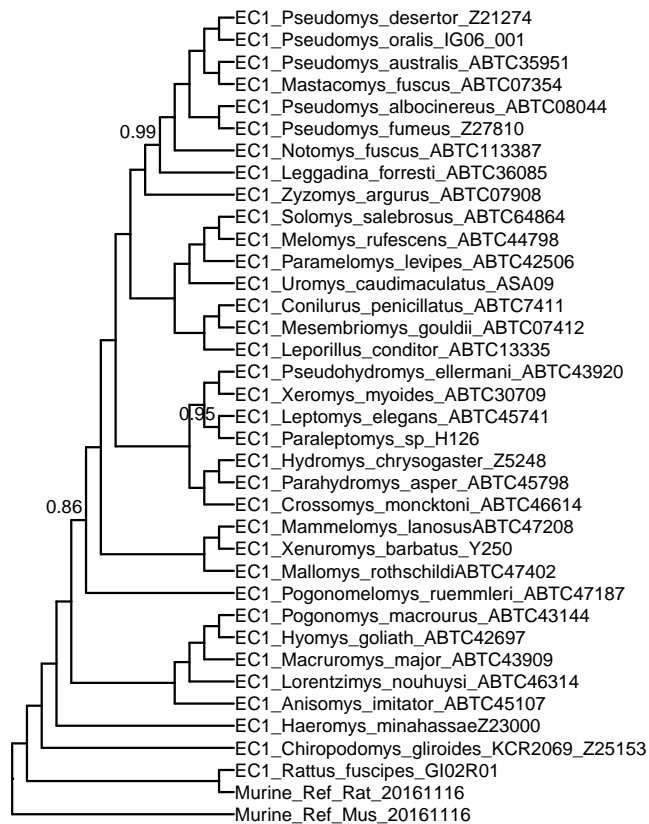

Cardueae\_iqtree\_run1\_ASTRAL

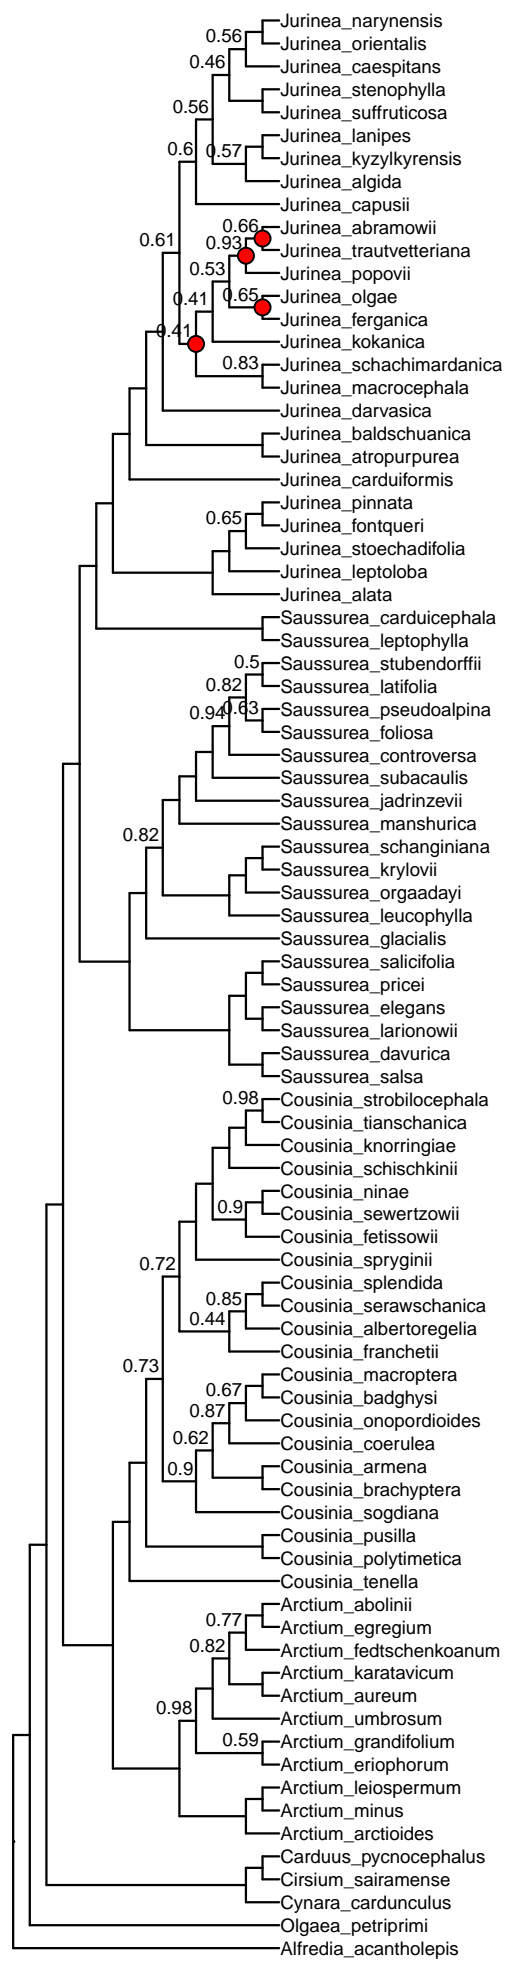

Cardueae\_iqtree\_run2\_ASTRAL

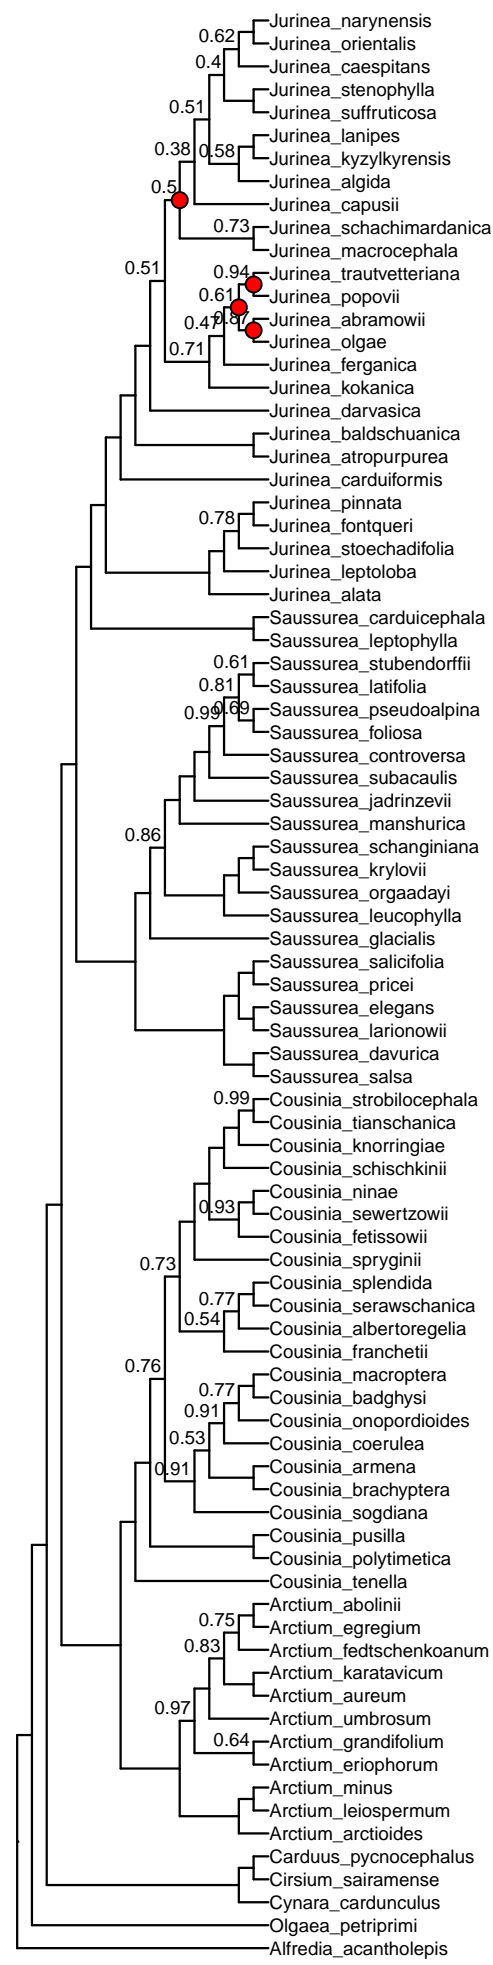

Cardueae\_raxml\_ng\_run1\_ASTRAL

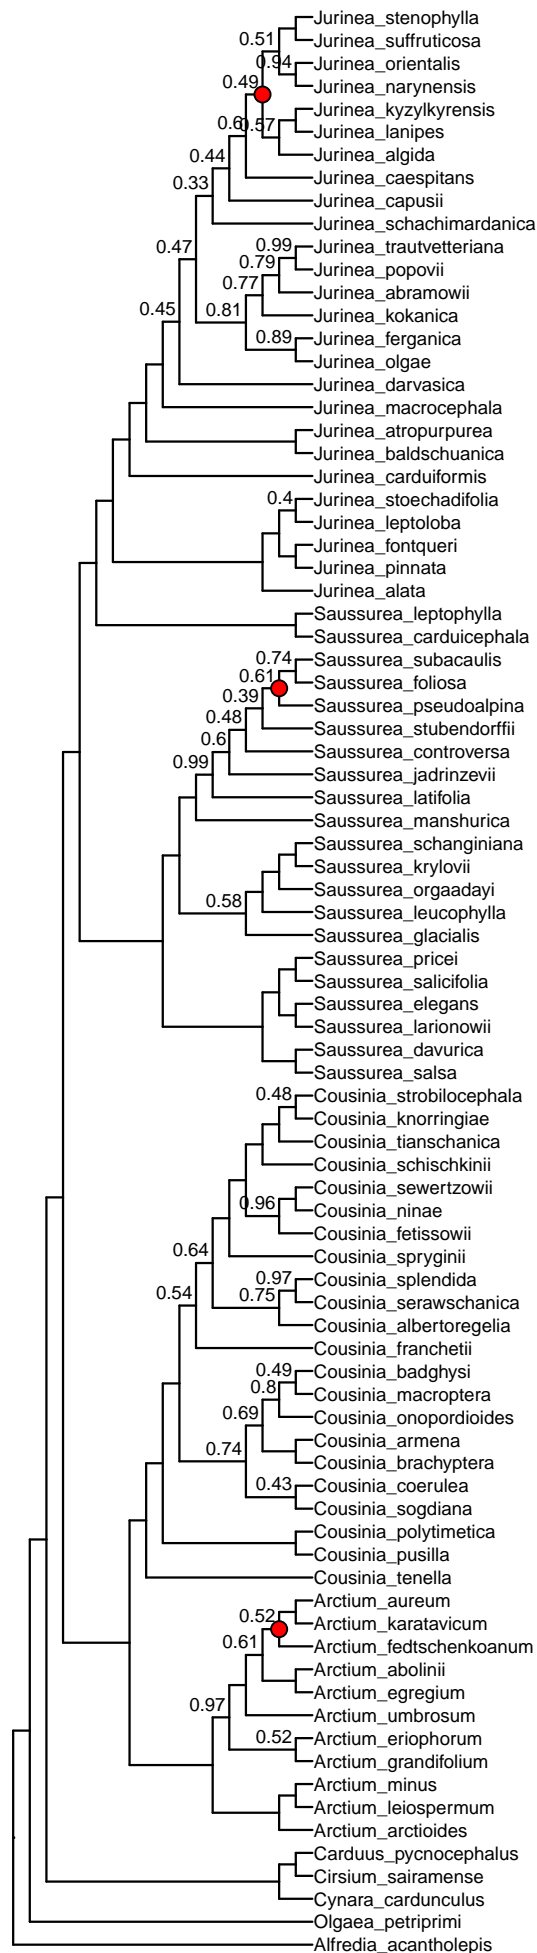

Cardueae\_raxml\_ng\_run2\_ASTRAL

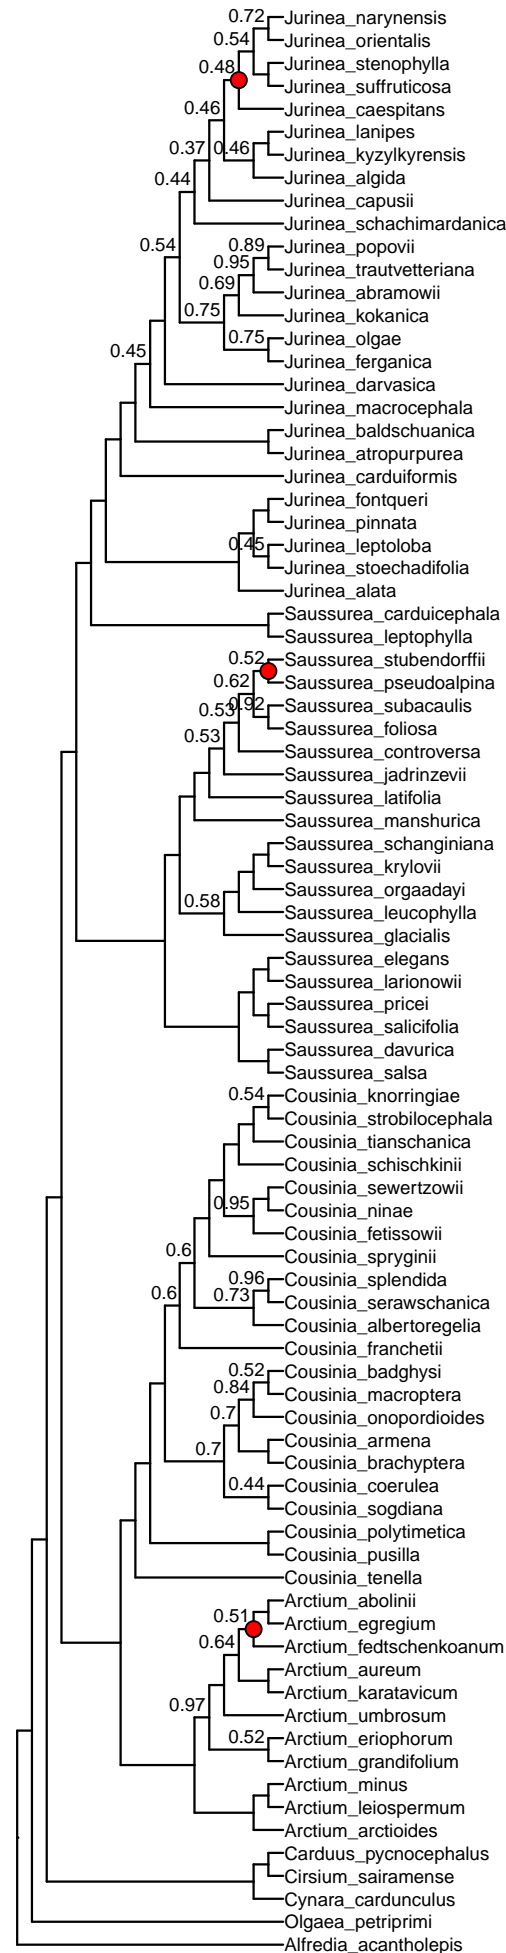

Caryophyllales\_iqtree\_run1\_ASTRAL

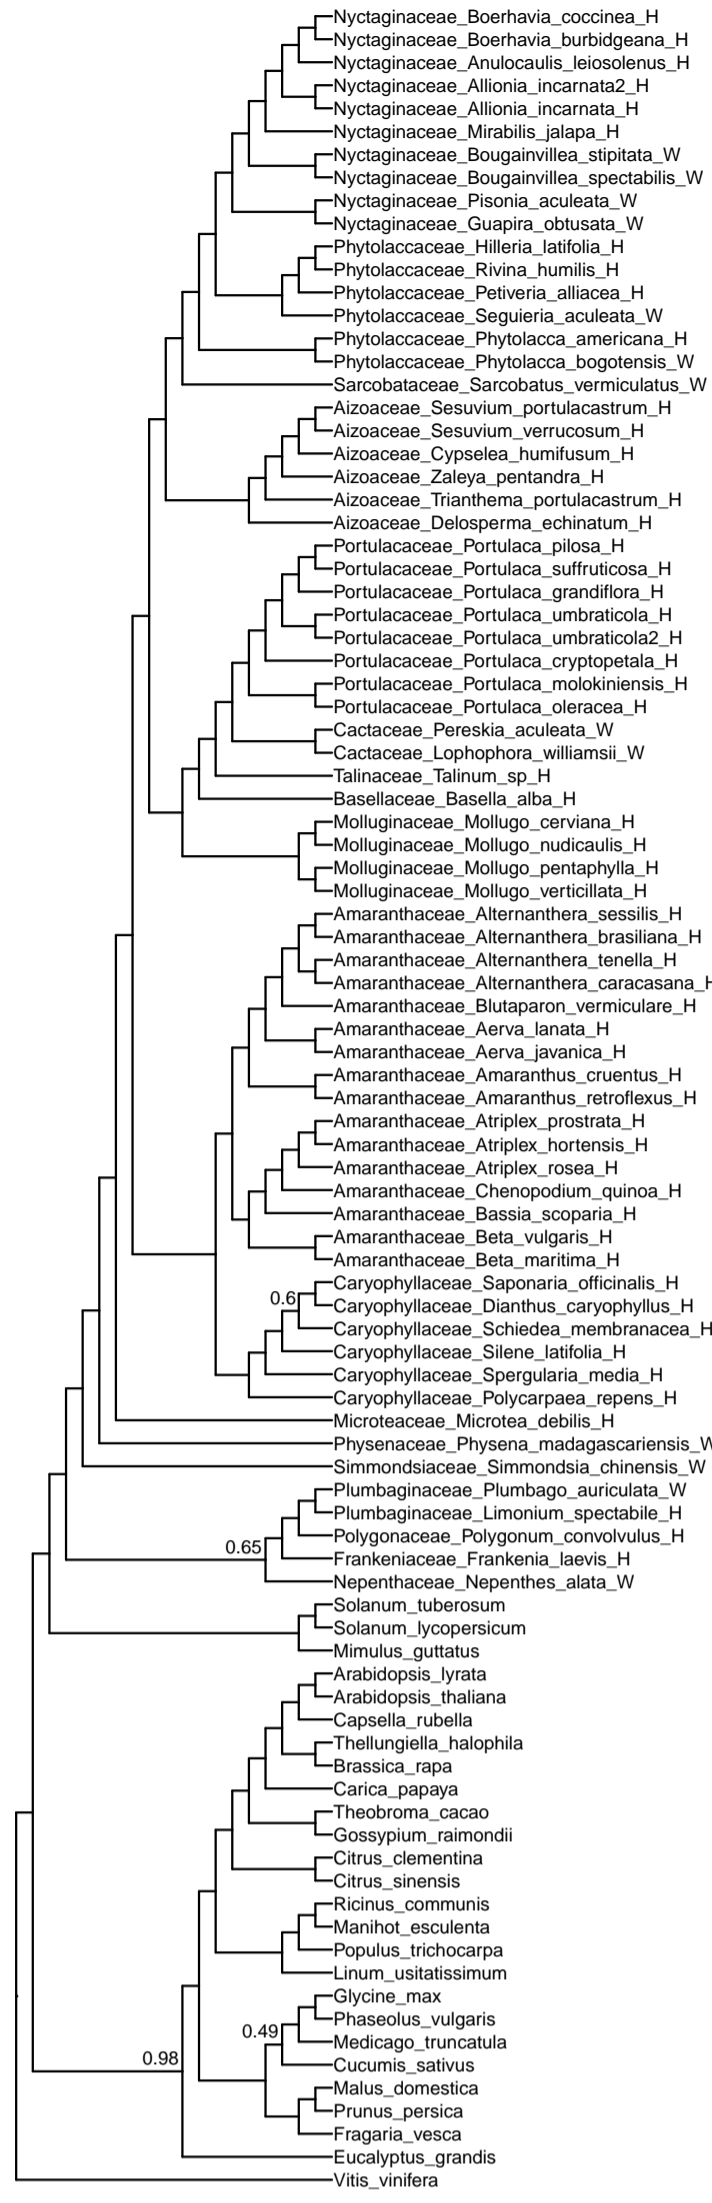

Caryophyllales\_iqtree\_run2\_ASTRAL

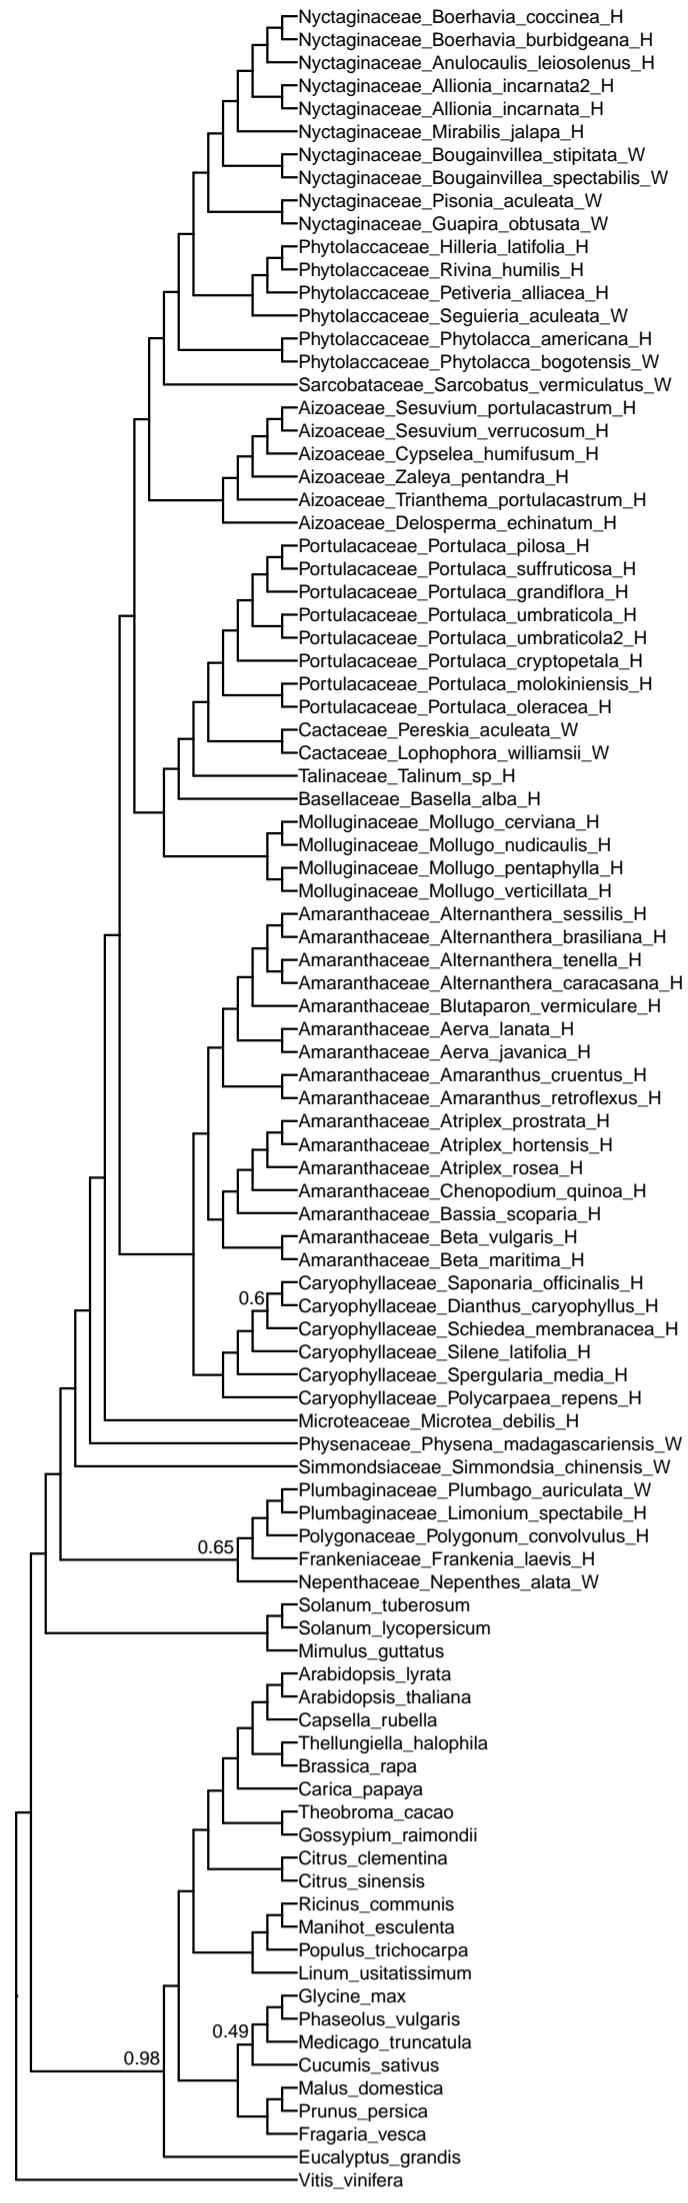

Caryophyllales\_raxml\_ng\_run1\_ASTRAL

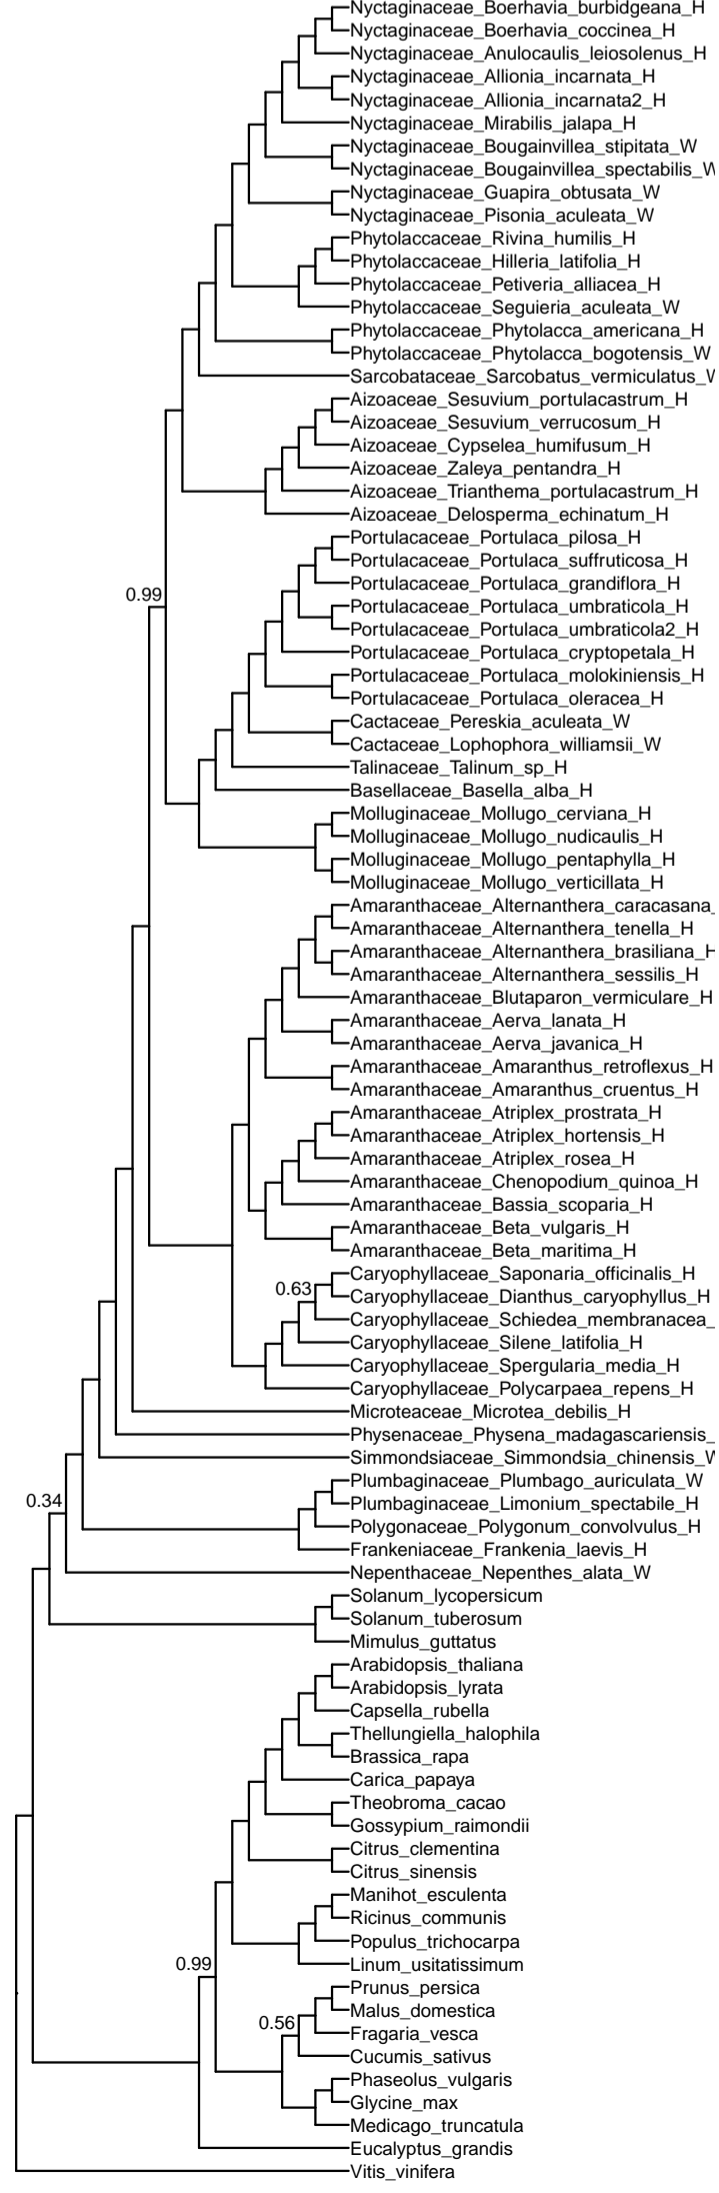

Caryophyllales\_raxml\_ng\_run2\_ASTRAL

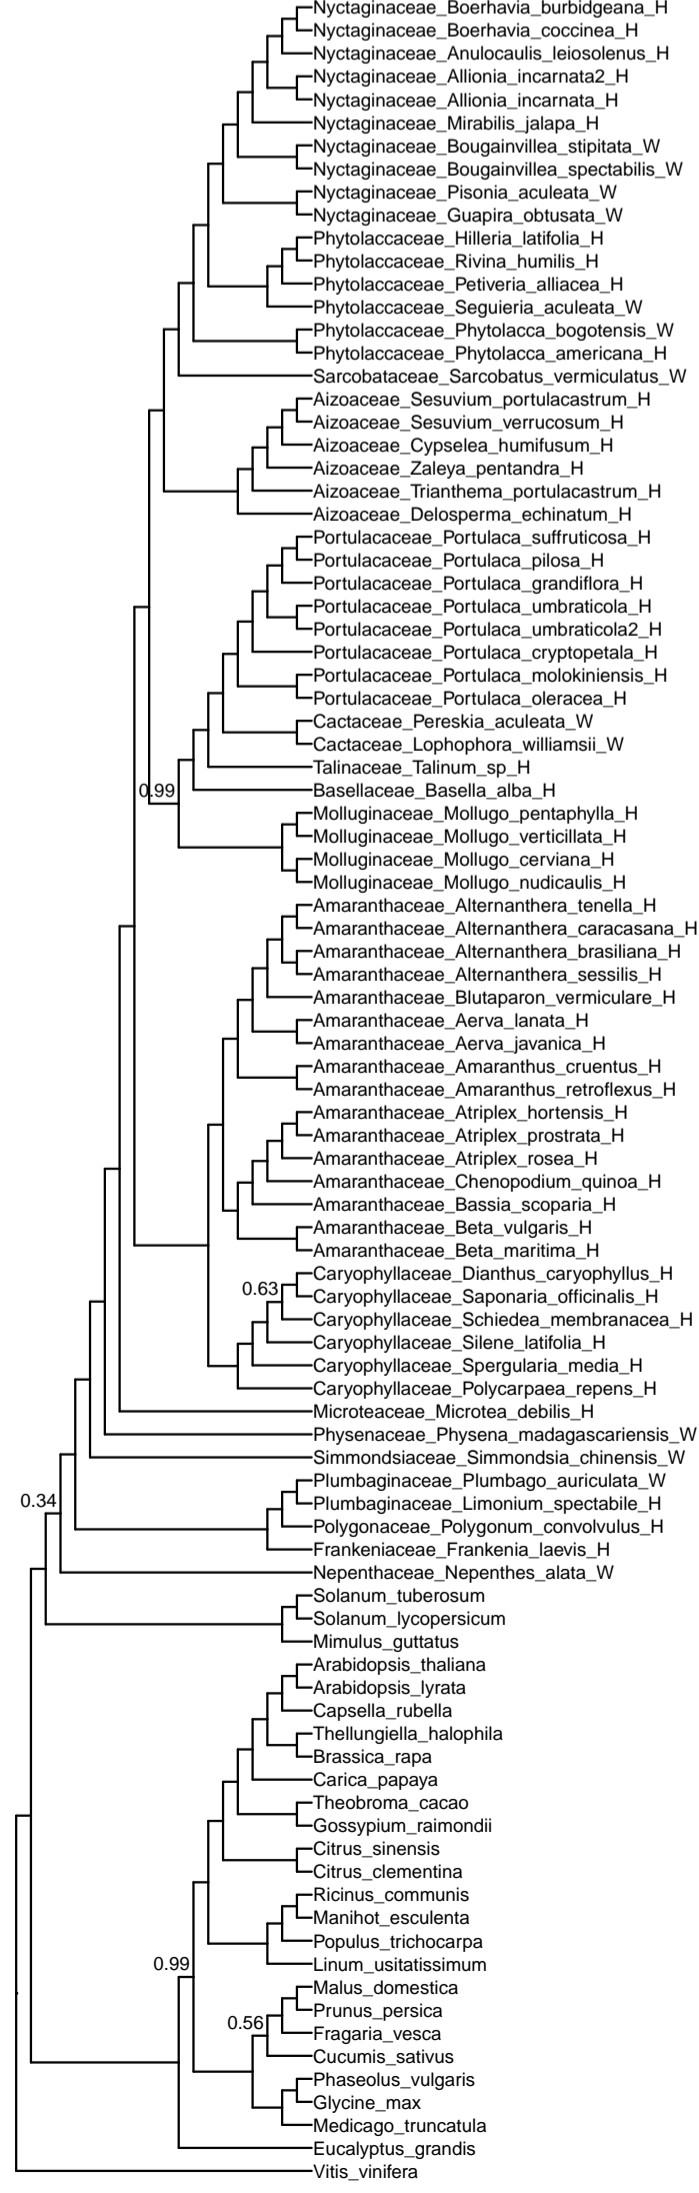



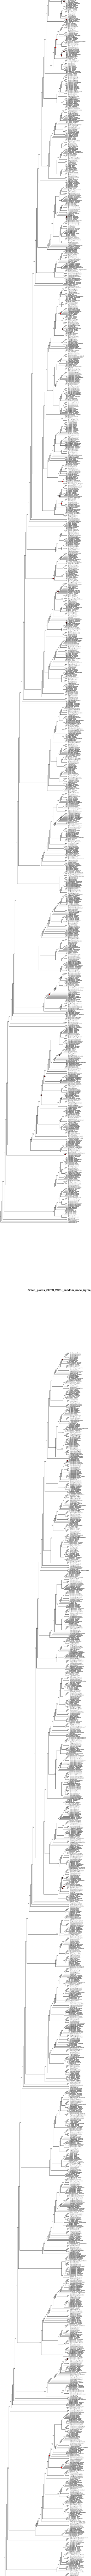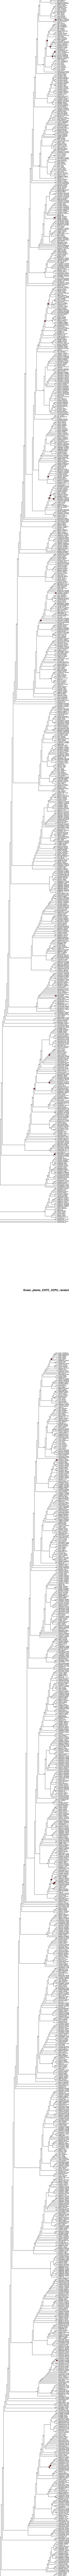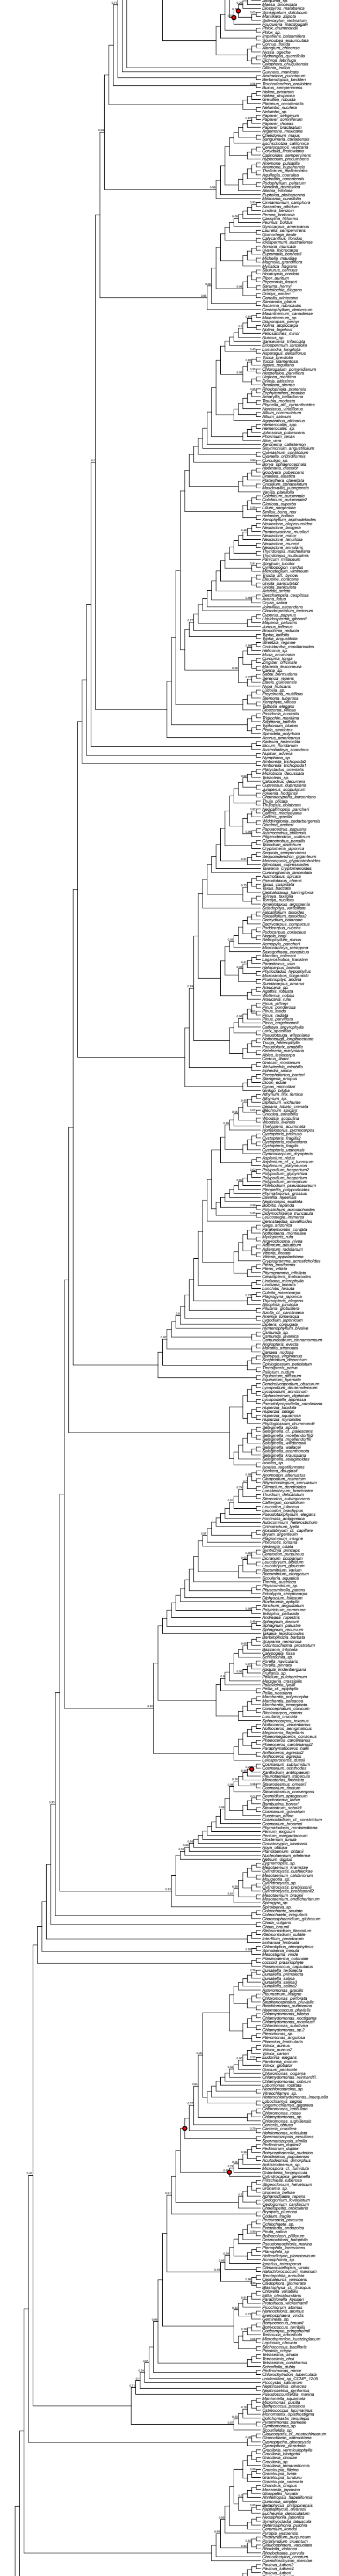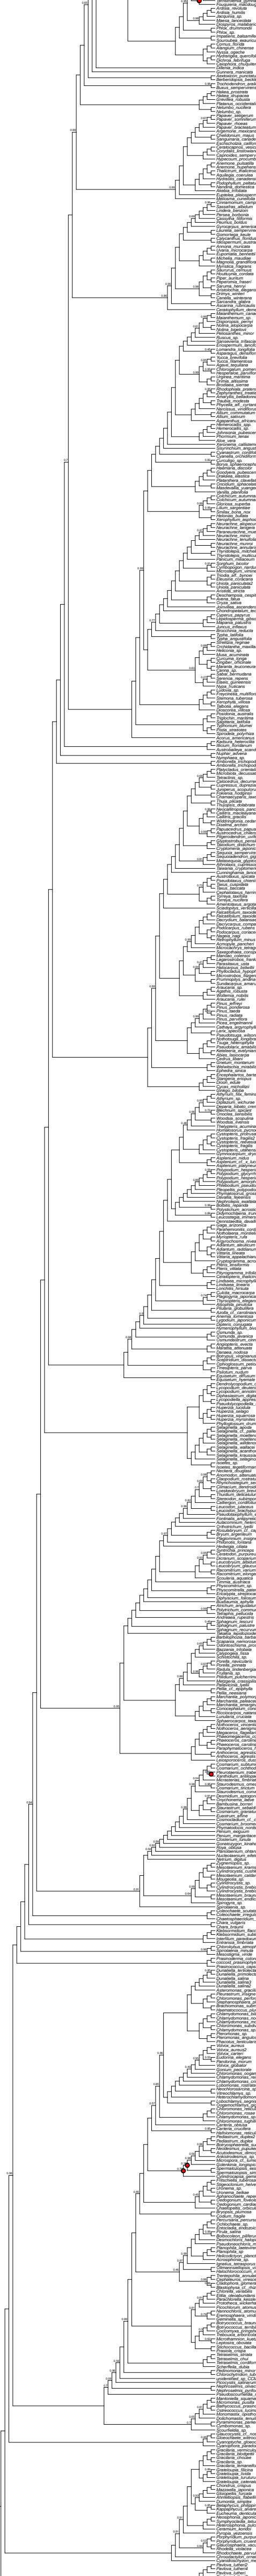



Jaltomata\_iqtree\_run1\_ASTRAL

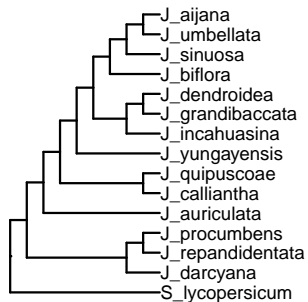

Jaltomata\_iqtree\_run2\_ASTRAL

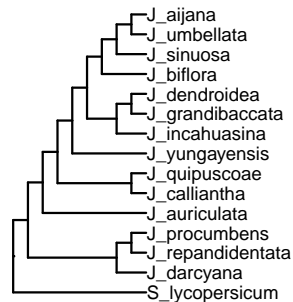

Jaltomata\_raxml\_ng\_run1\_ASTRAL

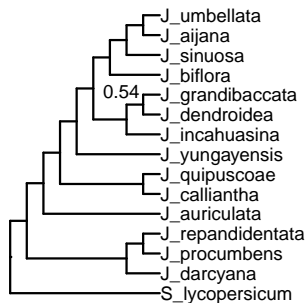

Jaltomata\_raxml\_ng\_run2\_ASTRAL

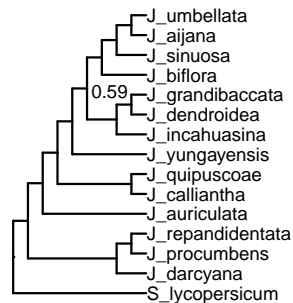

Protea\_iquree\_run1\_ASTRAL

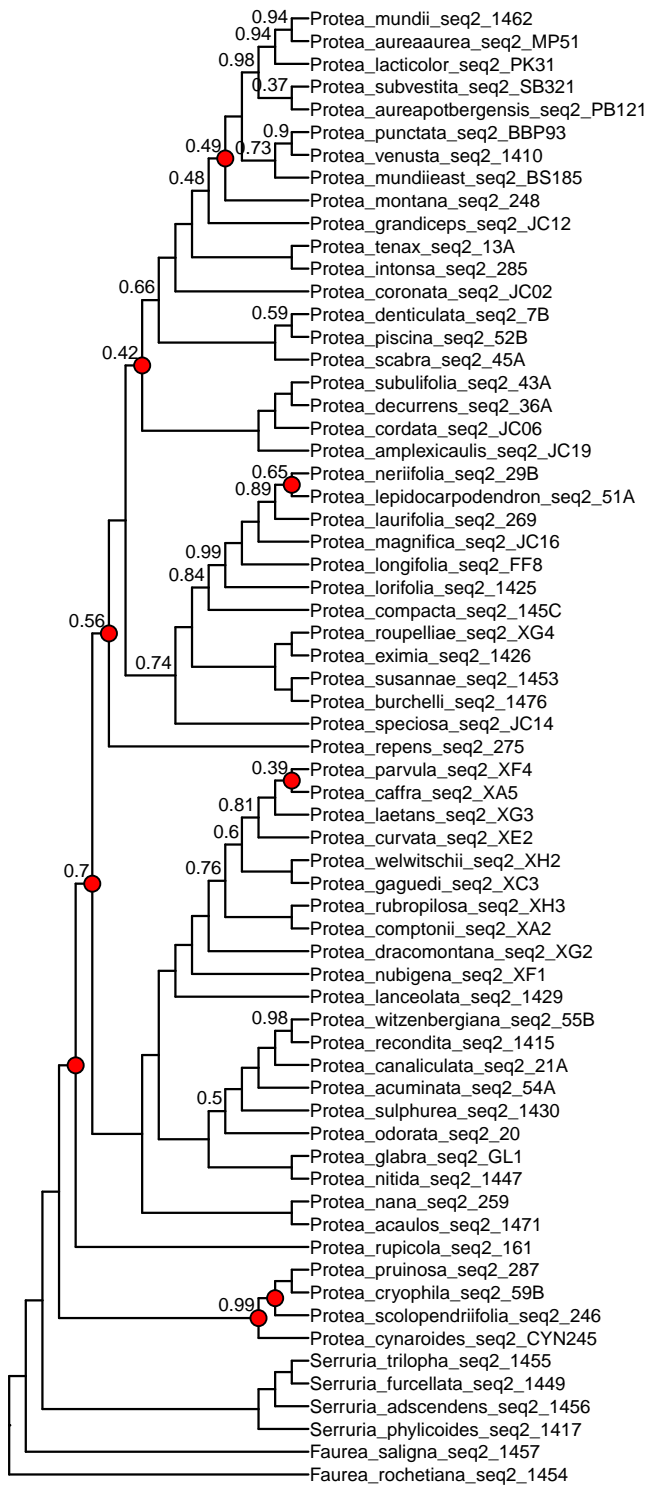

Protea\_iquree\_run2\_ASTRAL

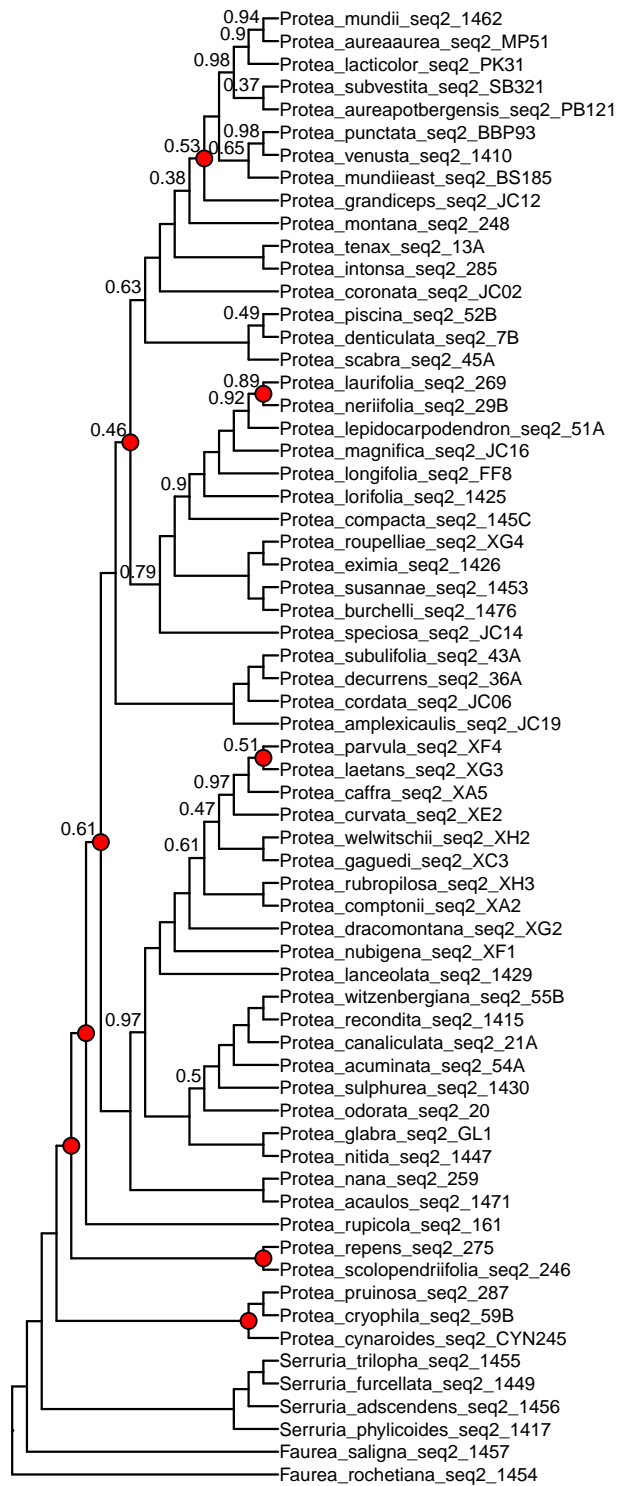

Protea\_raxml\_ng\_run1\_ASTRAL

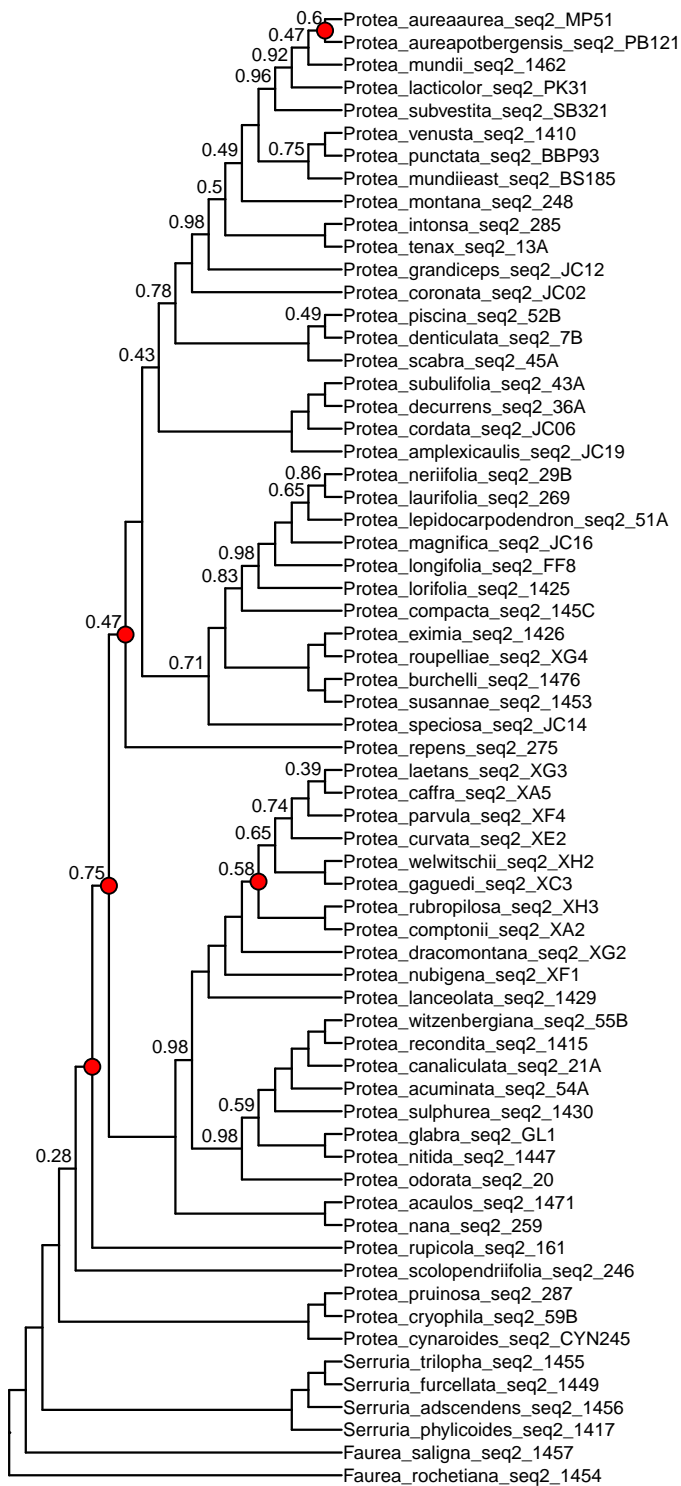

Protea\_raxml\_ng\_run2\_ASTRAL

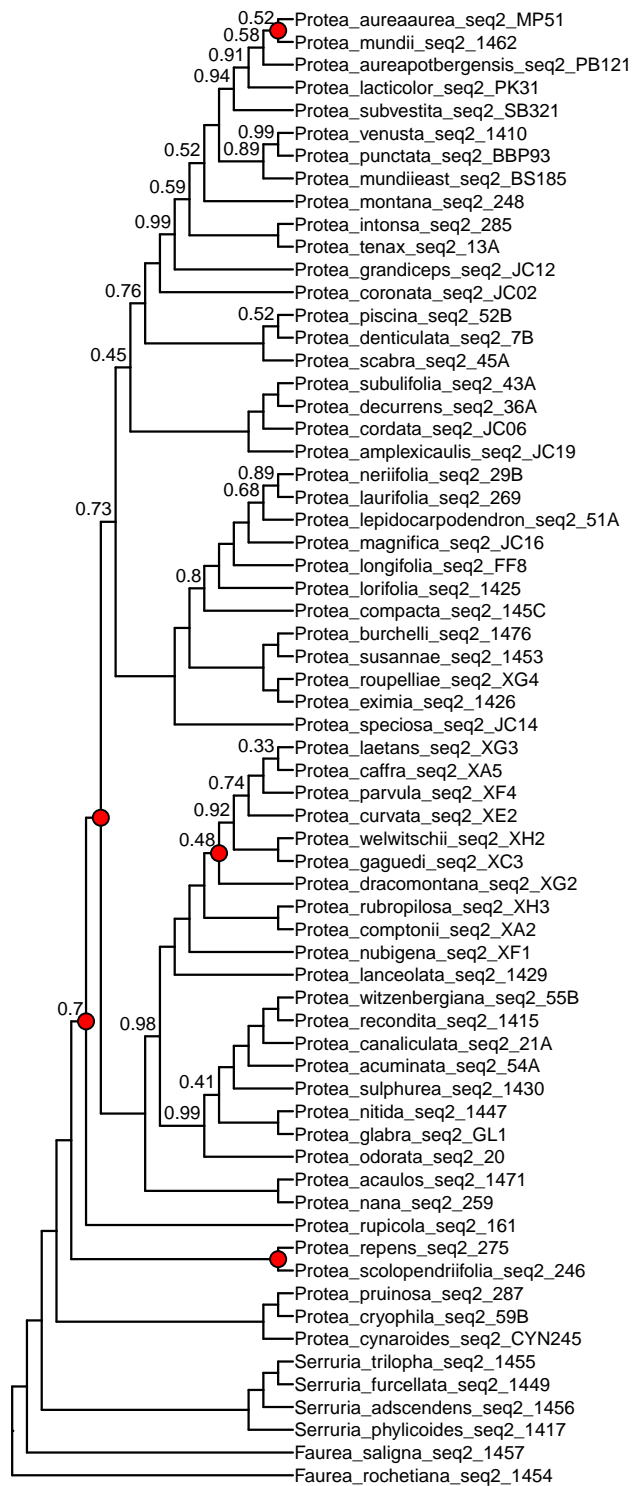

Aspergillaceae\_iqtree\_run1\_ASTRAL

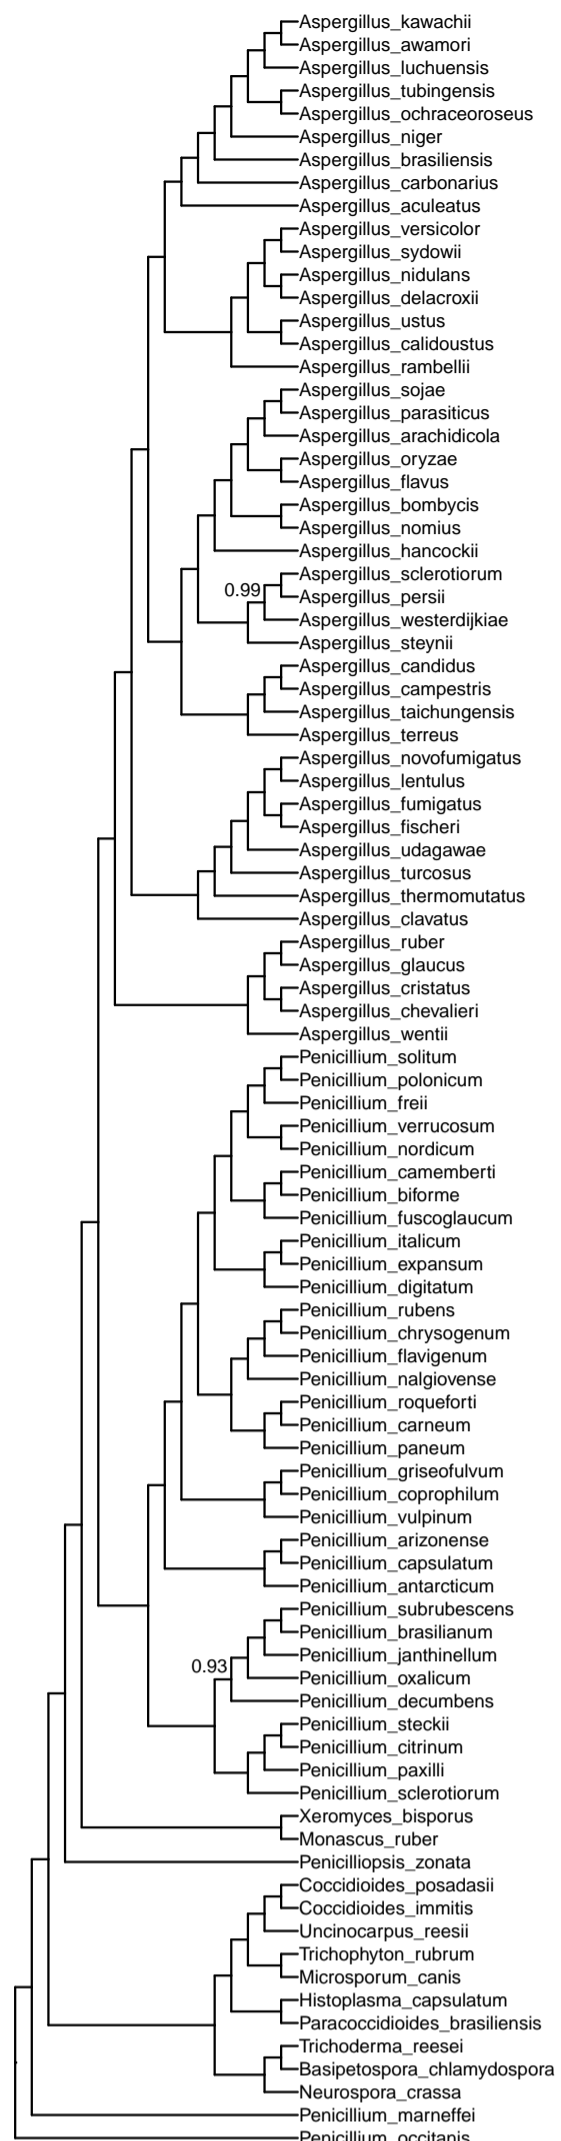

Aspergillaceae\_iqtree\_run2\_ASTRAL

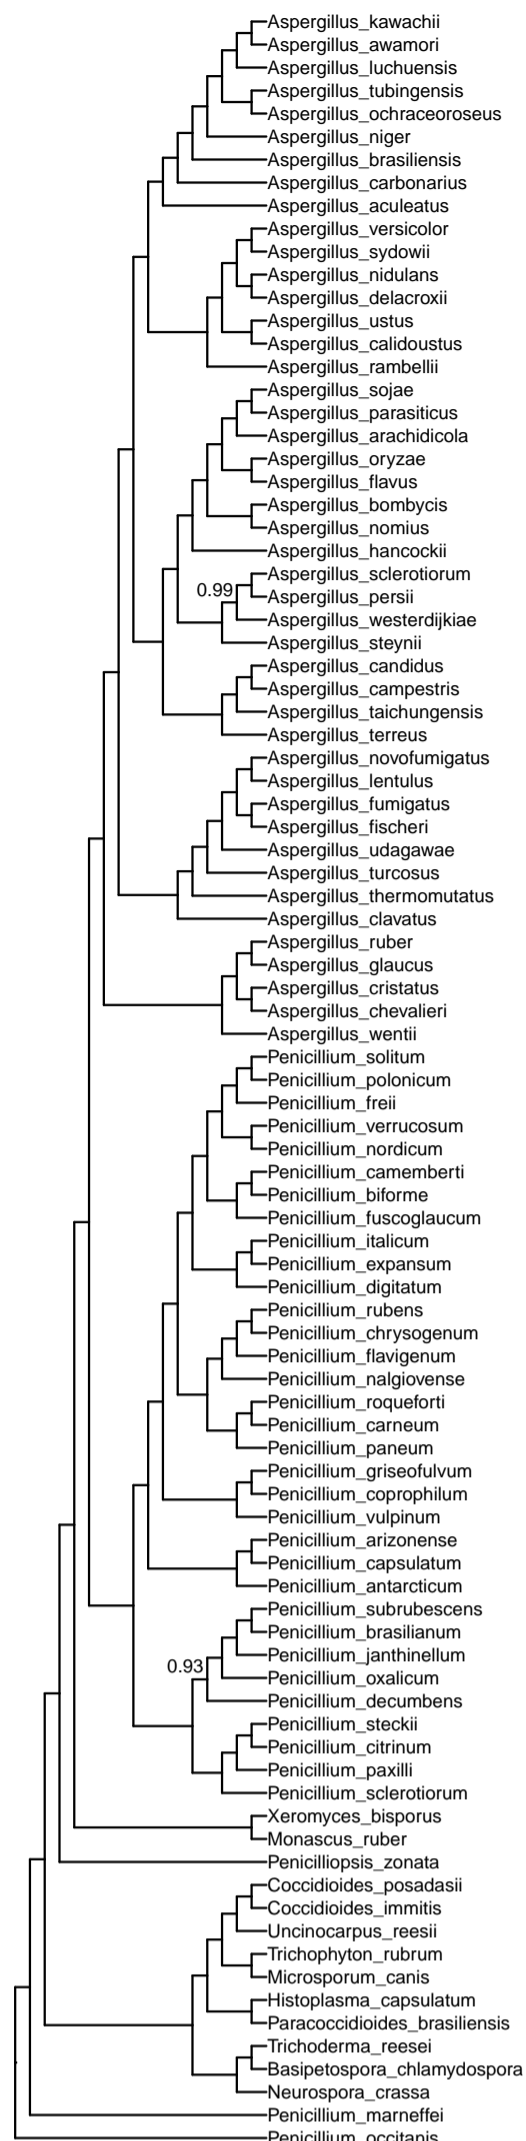

Aspergillaceae\_raxml\_ng\_run1\_ASTRAL

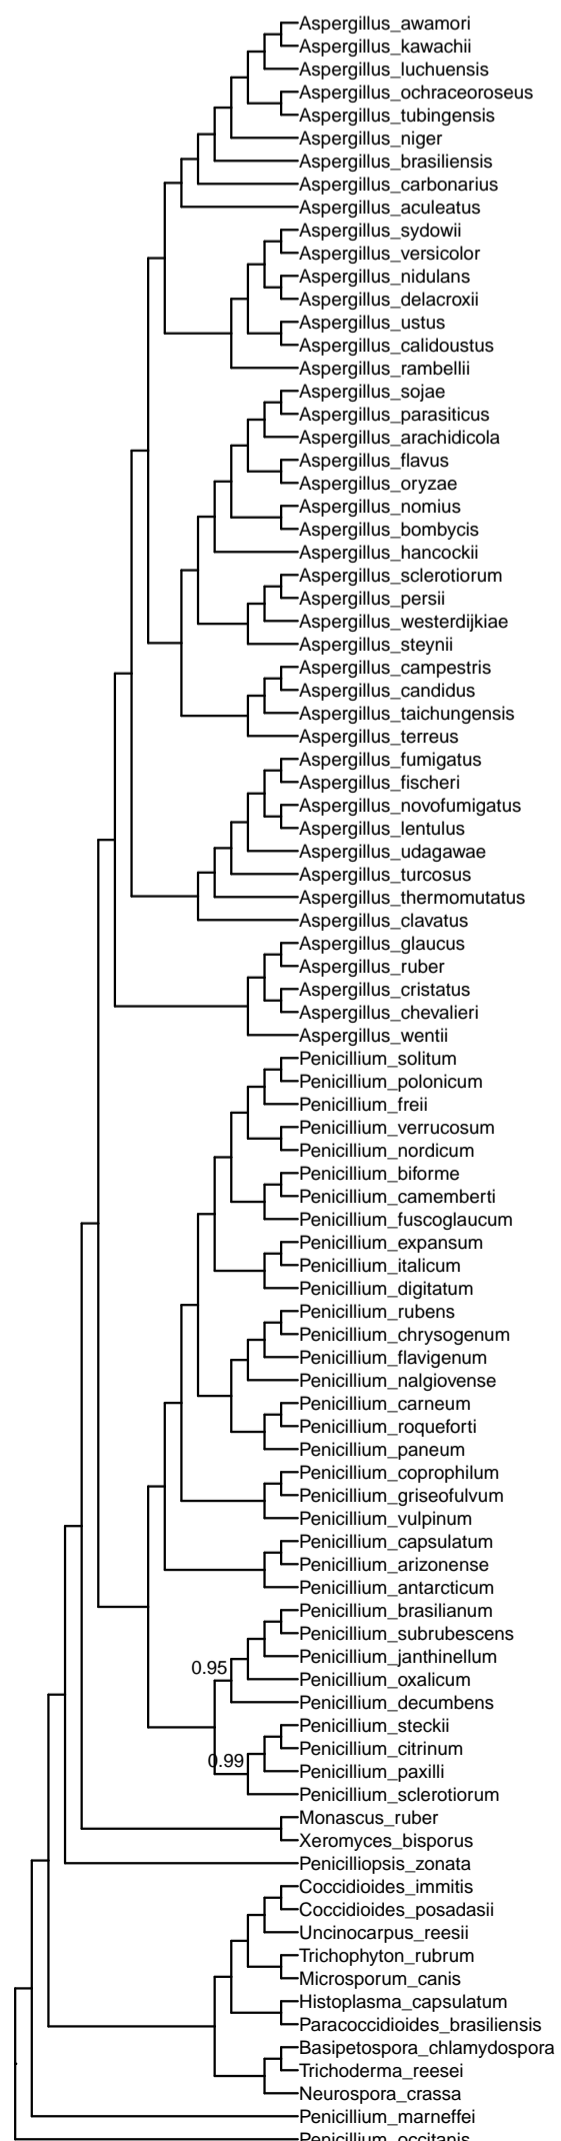

Aspergillaceae\_raxml\_ng\_run2\_ASTRAL

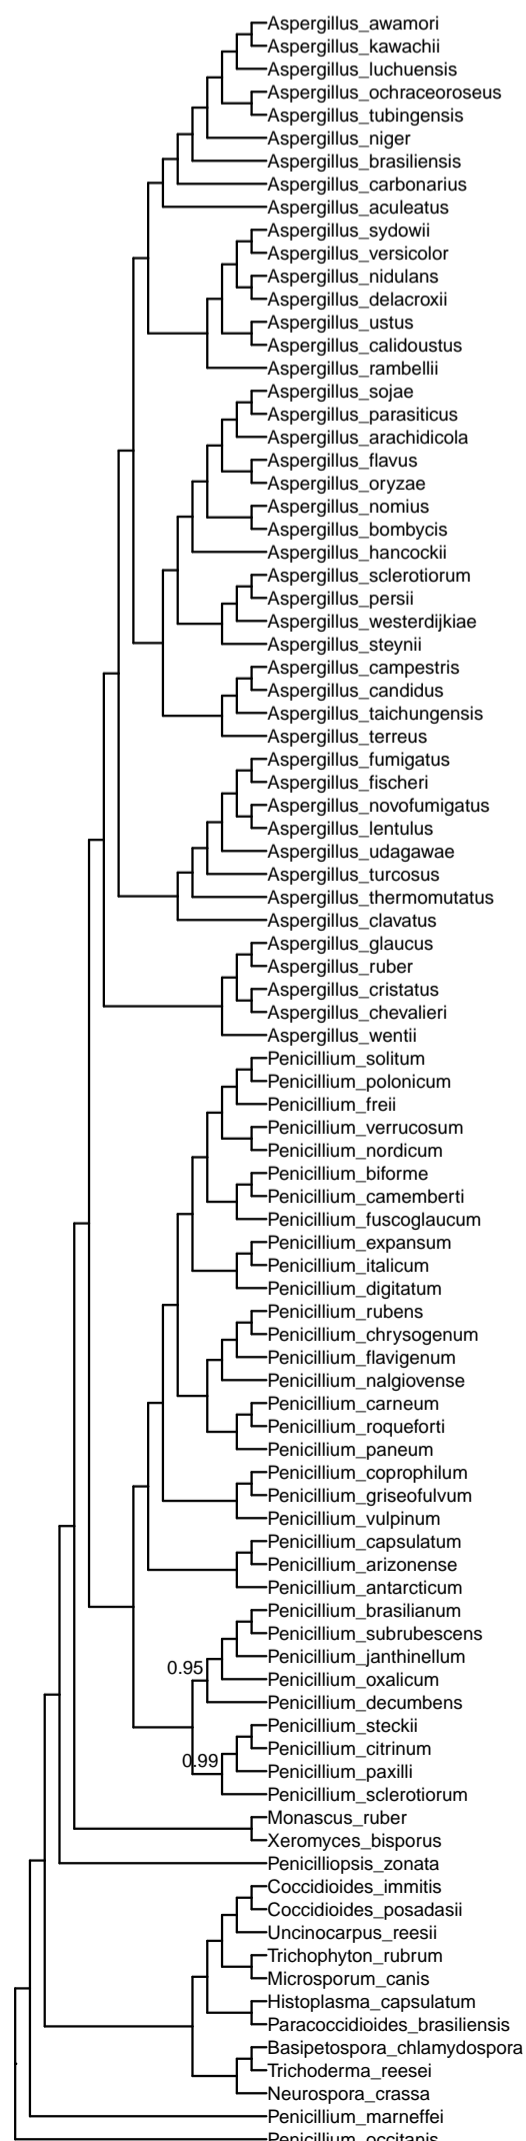





Hanseniaspora\_iqtree\_run1\_ASTRAL

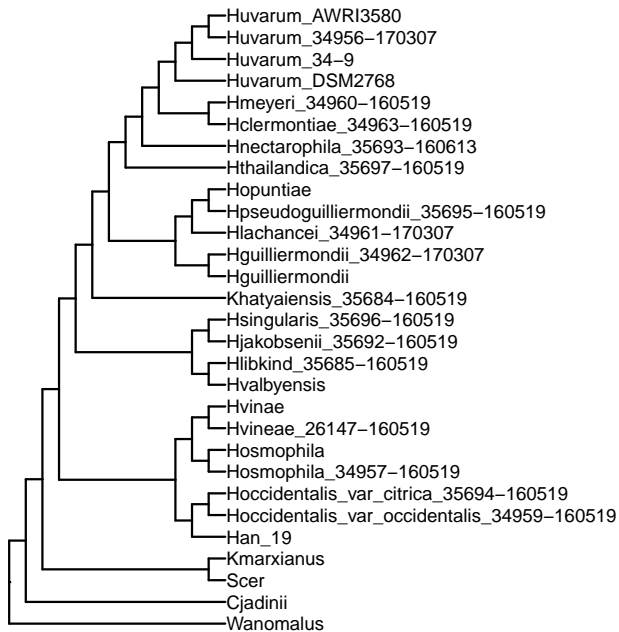

Hanseniaspora\_iqtree\_run2\_ASTRAL

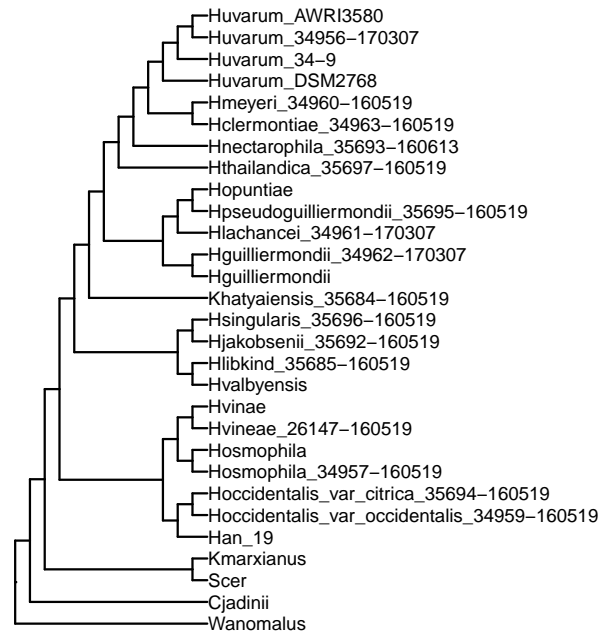

Hanseniaspora\_raxml\_ng\_run1\_ASTRAL

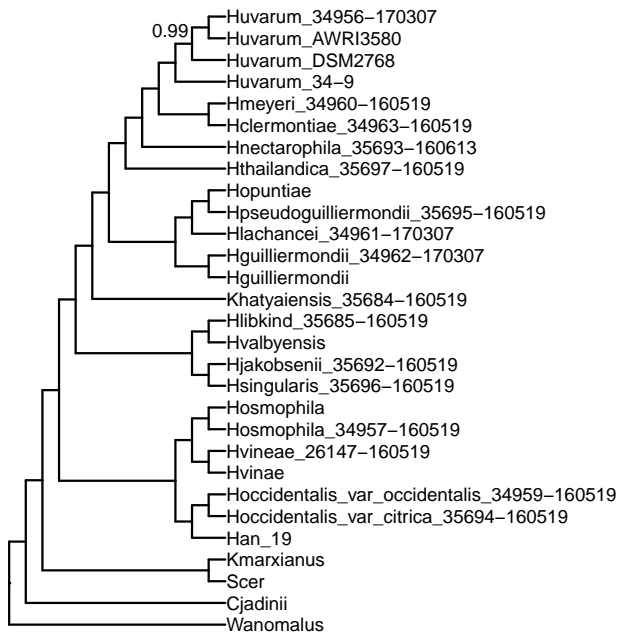

Hanseniaspora\_raxml\_ng\_run2\_ASTRAL

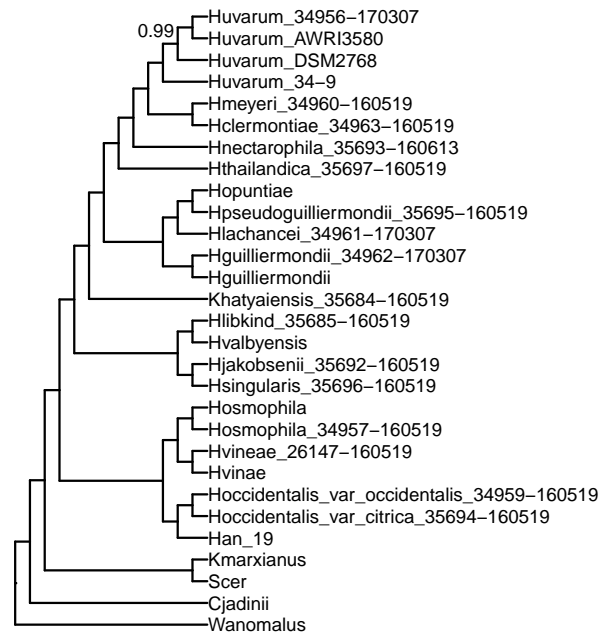

Rhizoplaca\_iqtree\_run1\_ASTRAL

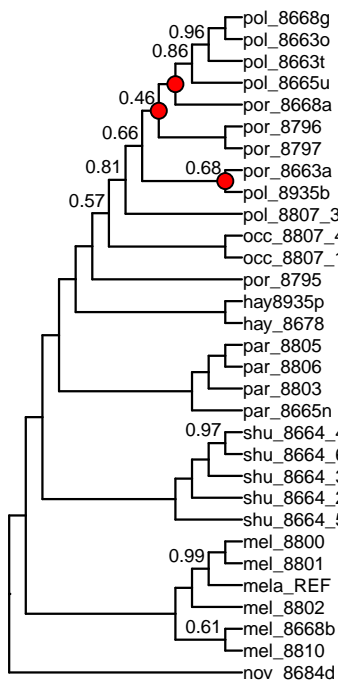

Rhizoplaca\_iqtree\_run2\_ASTRAL

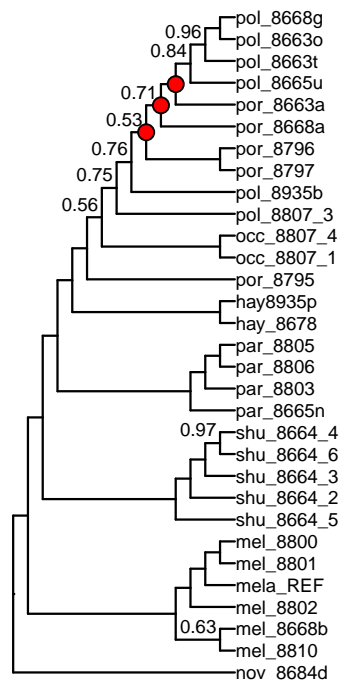

Rhizoplaca\_raxml\_ng\_run1\_ASTRAL

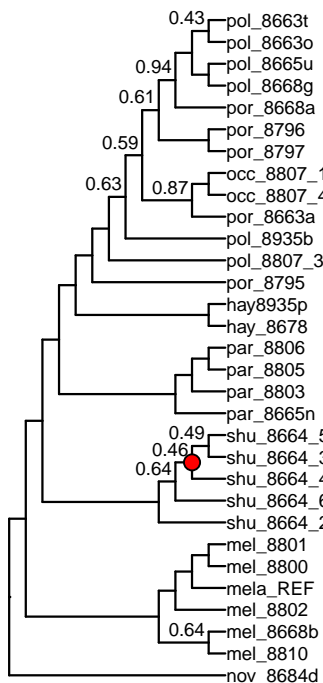

Rhizoplaca\_raxml\_ng\_run2\_ASTRAL

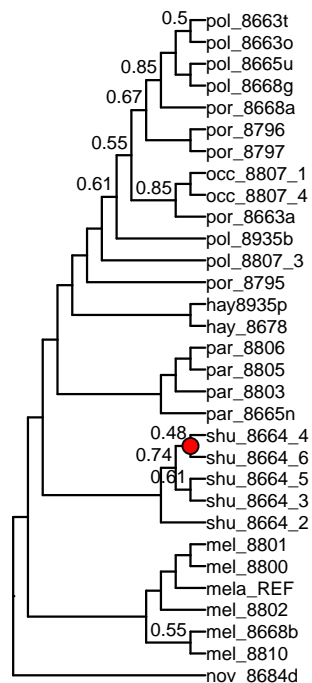

**Supplementary Figure 13. Concatenation-based ML trees for 15 phylogenomic datasets.** For each of 15 datasets, concatenation-based ML trees were inferred twice from the supermatrix using IQ-TREE and RAxML-NG with identical settings. We visualized phylogenetic trees using the R package ggtree. 15 / 15 phylogenomic datasets produced topologically identical concatenation-based ML species phylogenies when we inferred them twice independently from the same supermatrix using identical parameter settings in either IQ-TREE or RAxML-NG. All phylogenomic datasets analyzed by RAxML-NG yielded exactly the same concatenation-based ML species phylogeny, where the topology, branch length, and branch support are identical across Run1 and Run2. In contrast, only 4 / 15 (26%) phylogenomic datasets analyzed by IQ-TREE yielded exactly the same concatenation-based ML species phylogeny where the topology, branch length, and branch support are identical across Run1 and Run2.

| Order | Dataset               | Program  | Topological difference (%) <sup>a</sup> | Branch distance <sup>b</sup> | Bipartitions with different support values (%) <sup>c</sup> |
|-------|-----------------------|----------|-----------------------------------------|------------------------------|-------------------------------------------------------------|
| 1     | Animal: Bees          | IQ-TREE  | 0                                       | 1.46E-07                     | 2.7                                                         |
| 1     | Animal: Bees          | RAxML-NG | 0                                       | 0                            | 0                                                           |
| 2     | Animal: Birds         | IQ-TREE  | 0                                       | 4.09E-09                     | 1.5                                                         |
| 2     | Animal: Birds         | RAxML-NG | 0                                       | 0                            | 0                                                           |
| 3     | Animal: Butterflies   | IQ-TREE  | 0                                       | 0.000283233                  | 16.7                                                        |
| 3     | Animal: Butterflies   | RAxML-NG | 0                                       | 0                            | 0                                                           |
| 4     | Animal: Lizards       | IQ-TREE  | 0                                       | 1.49E-07                     | 0                                                           |
| 4     | Animal: Lizards       | RAxML-NG | 0                                       | 0                            | 0                                                           |
| 5     | Animal: Marine fishes | IQ-TREE  | 0                                       | 1.03E-08                     | 0.9                                                         |
| 5     | Animal: Marine fishes | RAxML-NG | 0                                       | 0                            | 0                                                           |
| 6     | Animal: Rodents       | IQ-TREE  | 0                                       | 2.83E-10                     | 0                                                           |
| 6     | Animal: Rodents       | RAxML-NG | 0                                       | 0                            | 0                                                           |
| 7     | Plant: Cardueae       | IQ-TREE  | 0                                       | 2.45E-10                     | 0                                                           |
| 7     | Plant: Cardueae       | RAxML-NG | 0                                       | 0                            | 0                                                           |
| 8     | Plant: Caryophyllales | IQ-TREE  | 0                                       | 0                            | 0                                                           |
| 8     | Plant: Caryophyllales | RAxML-NG | 0                                       | 0                            | 0                                                           |
| 9     | Plant: Green plants   | IQ-TREE  | 0                                       | 0                            | NA                                                          |
| 9     | Plant: Green plants   | RAxML-NG | 0                                       | 0                            | 0                                                           |
| 10    | Plant: Jaltomata      | IQ-TREE  | 0                                       | 8.00E-10                     | 0                                                           |
| 10    | Plant: Jaltomata      | RAxML-NG | 0                                       | 0                            | 0                                                           |
| 11    | Plant: Protea         | IQ-TREE  | 0                                       | 3.46E-10                     | 0                                                           |
| 11    | Plant: Protea         | RAxML-NG | 0                                       | 0                            | 0                                                           |
| 12    | Fungi: Aspergillaceae | IQ-TREE  | 0                                       | 1.48E-07                     | 0                                                           |
| 12    | Fungi: Aspergillaceae | RAxML-NG | 0                                       | 0                            | 0                                                           |
| 13    | Fungi: Budding yeasts | IQ-TREE  | 0                                       | 0                            | 0                                                           |
| 13    | Fungi: Budding yeasts | RAxML-NG | 0                                       | 0                            | NA                                                          |
| 14    | Fungi: Hanseniaspora  | IQ-TREE  | 0                                       | 0                            | 0                                                           |
| 14    | Fungi: Hanseniaspora  | RAxML-NG | 0                                       | 0                            | 0                                                           |
| 15    | Fungi: Rhizoplaca     | IQ-TREE  | 0                                       | 3.32E-10                     | 0                                                           |
| 15    | Fungi: Rhizoplaca     | RAxML-NG | 0                                       | 0                            | 0                                                           |

<sup>a</sup> Percentage of bipartitions (or internal branches) that differ between two inferred species trees was quantified the normalized Robinson–Foulds tree distance.

<sup>b</sup> Branch distance between two inferred species trees was computed by the branch score distance of Kuhner and Felsenstein with the R packages ape and phangorn.

<sup>c</sup> The percentage of bipartitions (or internal branches) that received different bootstrap support values between two inferred species trees that were topologically identical (i.e., Topological difference is 0).

Bee\_igtree\_run1\_Concatenation\_ML

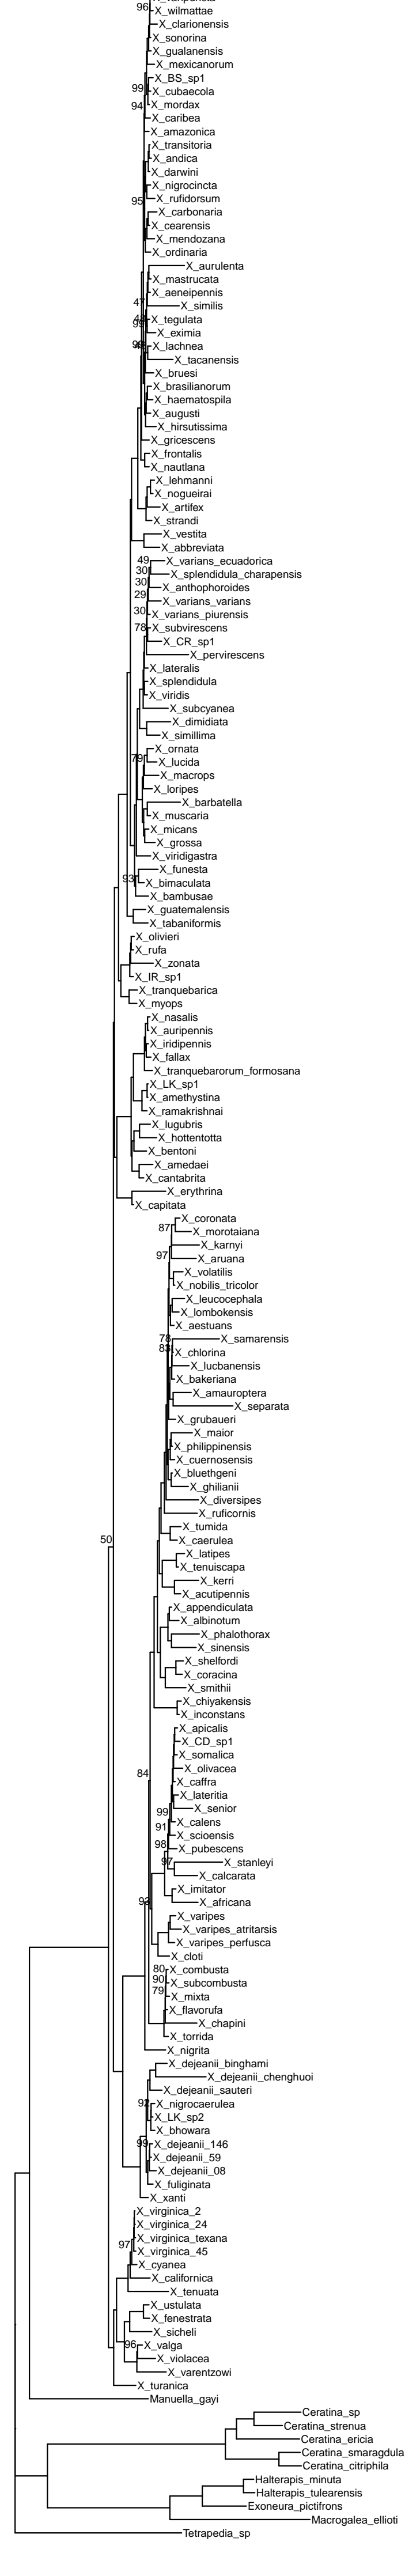

Bee\_igtree\_run2\_Concatenation\_ML

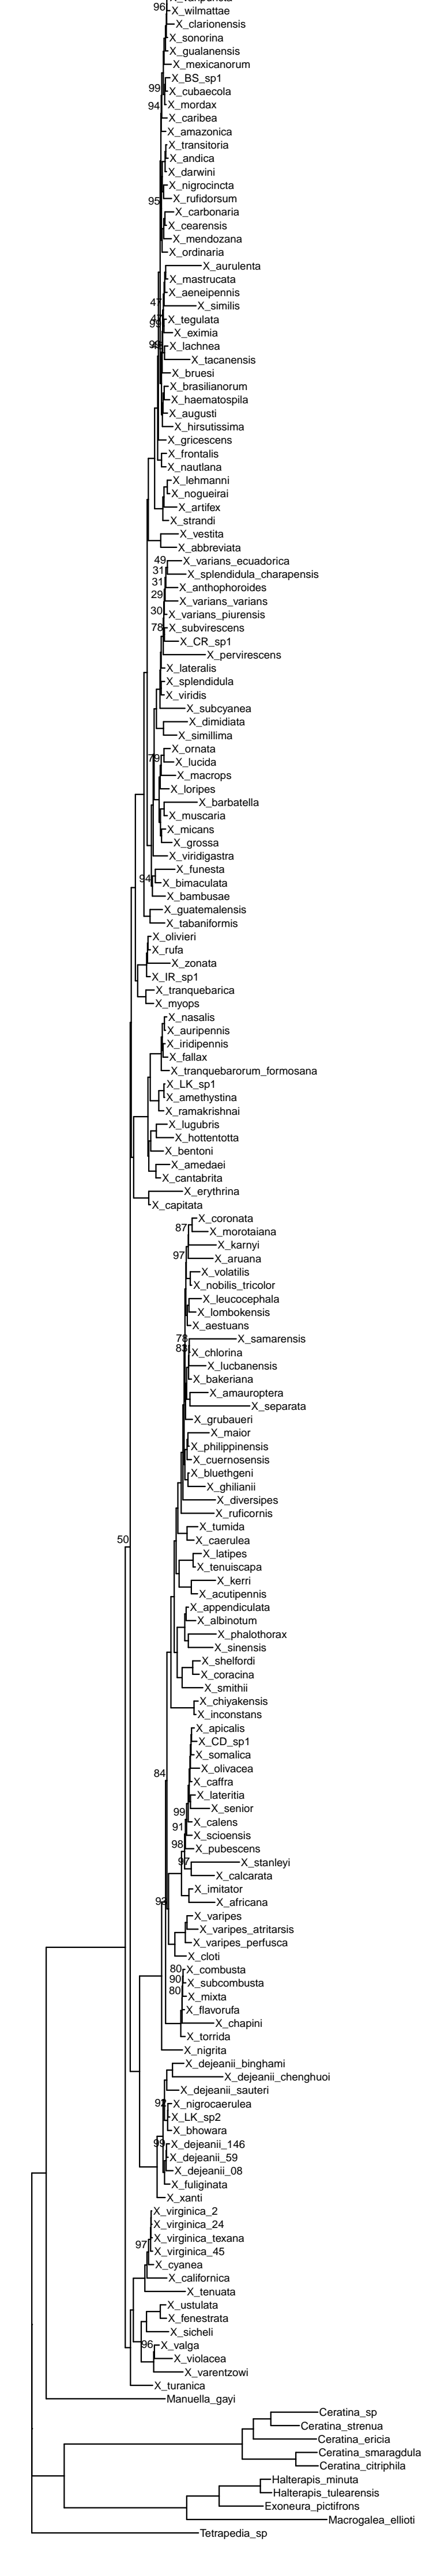

Bee\_raxml\_ng\_run1\_Concatenation\_ML

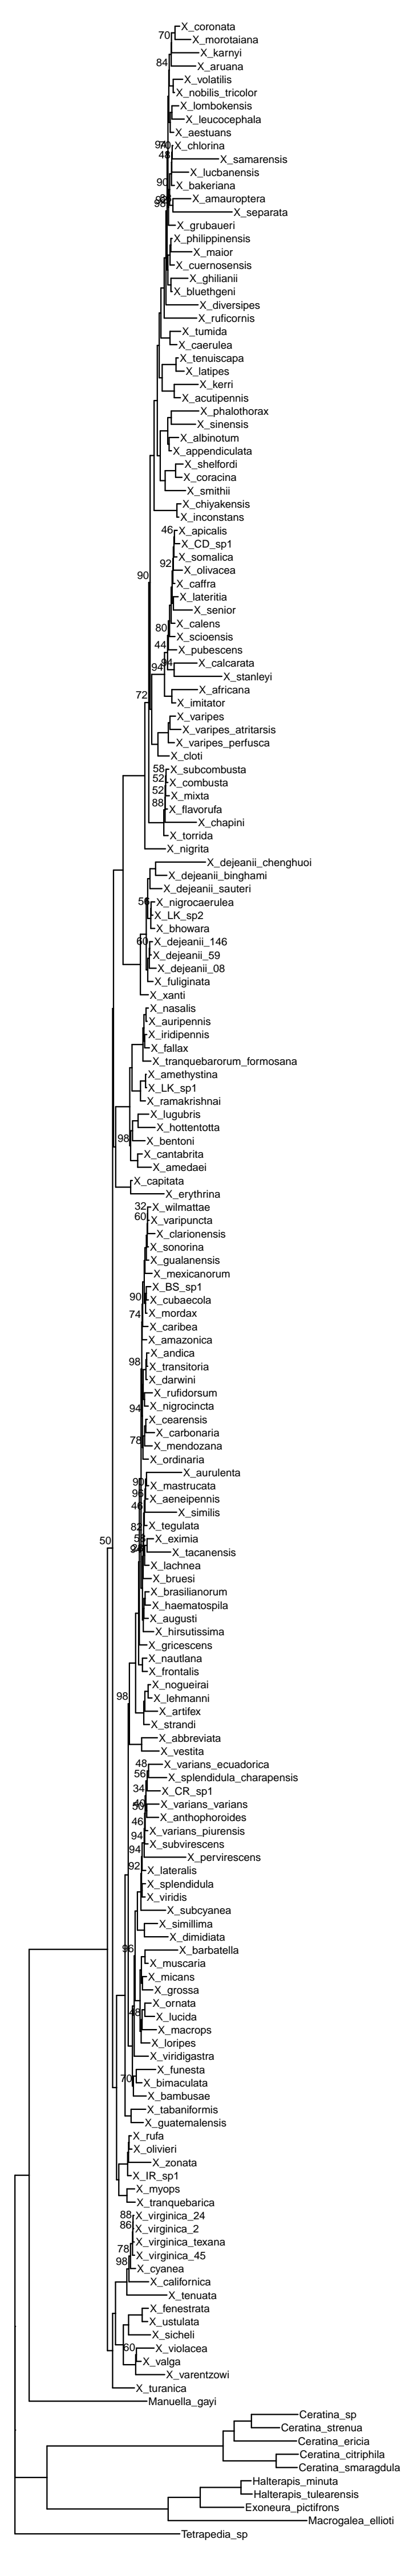

Bee\_raxml\_ng\_run2\_Concatenation\_ML

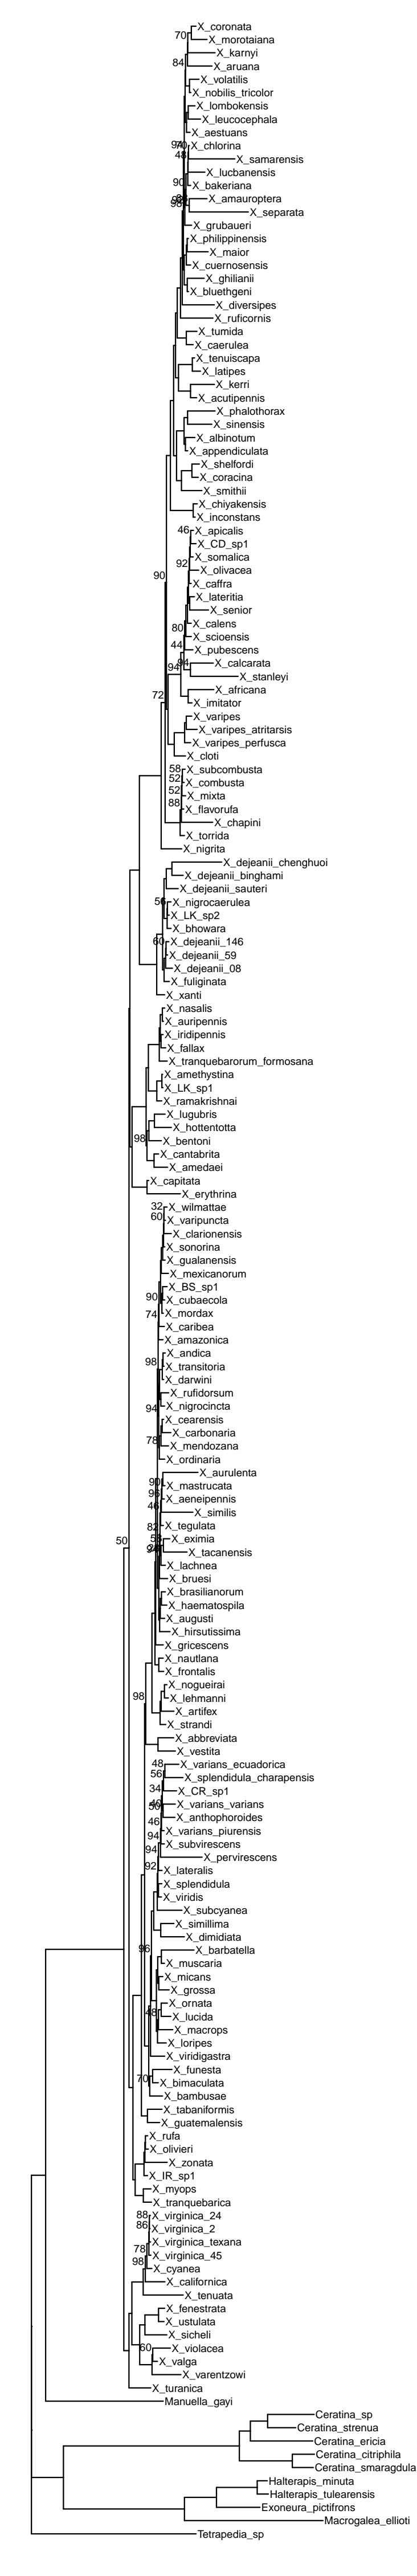



Butterfly\_iqtree\_run1\_Concatenation\_ML

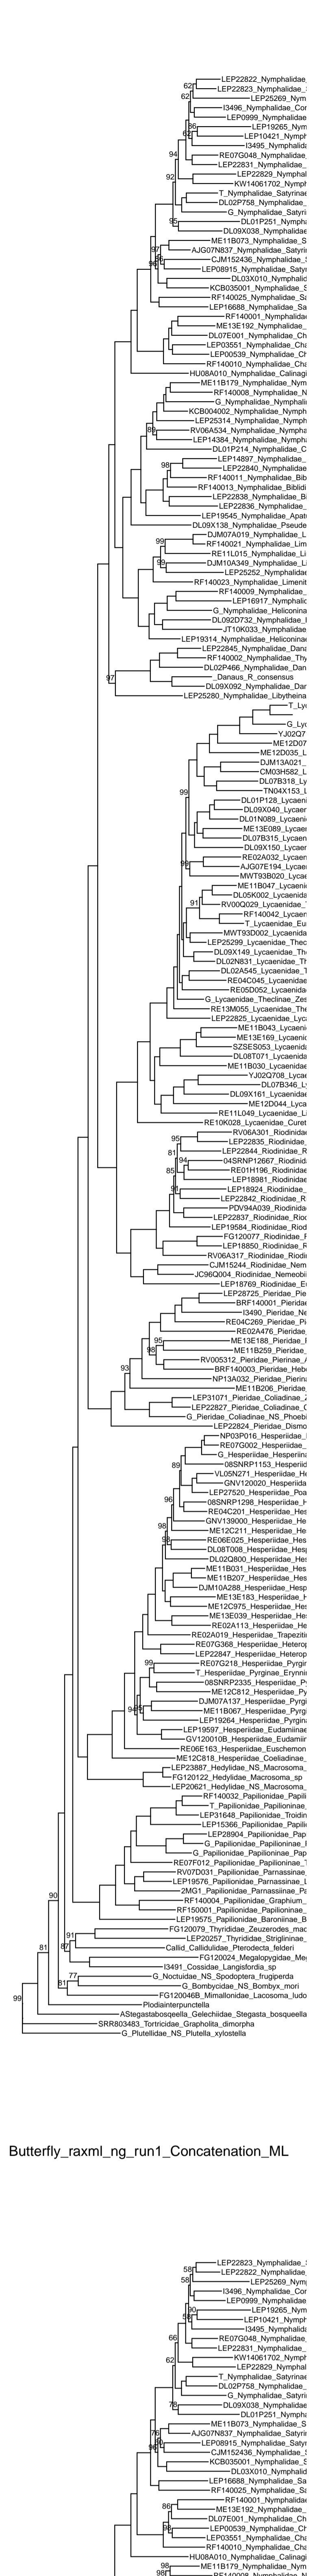

Butterfly\_iqtree\_run2\_Concatenation\_ML

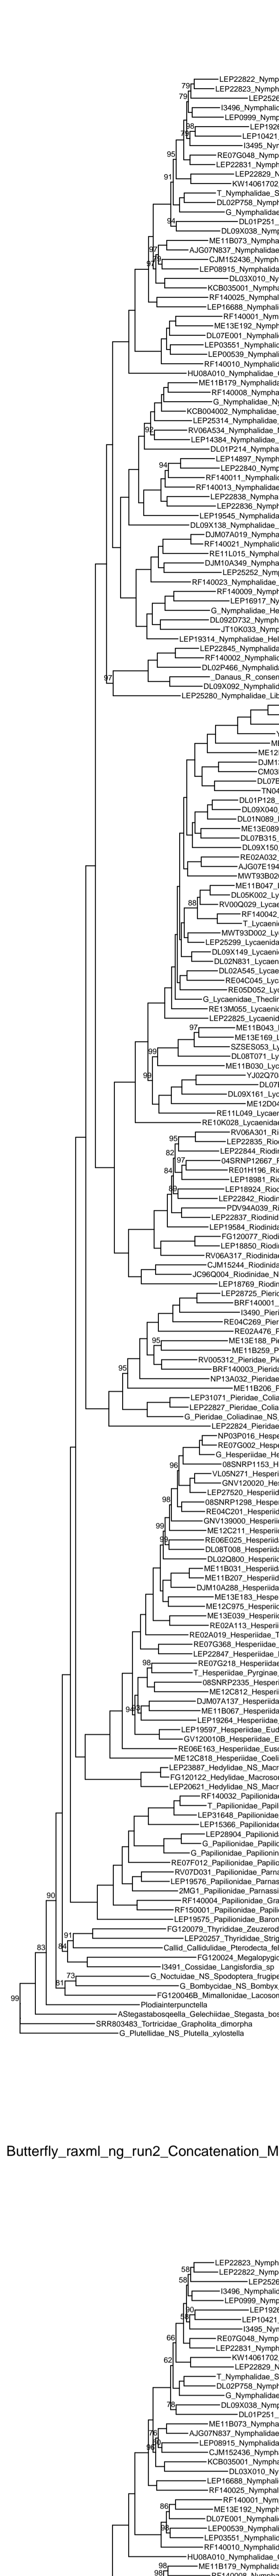

Butterfly\_raxml\_ng\_run1\_Concatenation\_ML

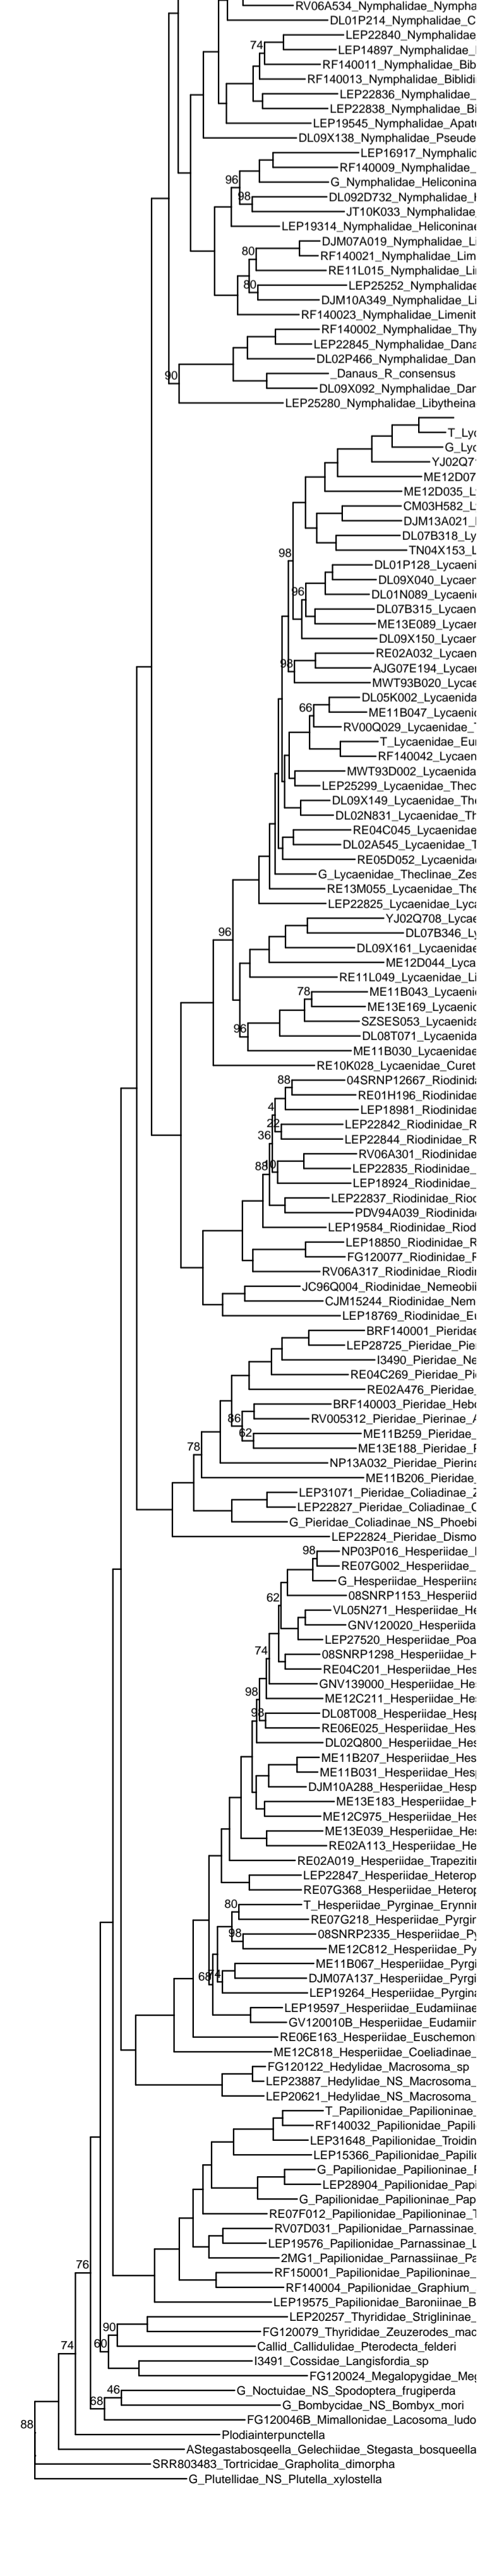

Butterfly\_raxml\_ng\_run2\_Concatenation\_ML

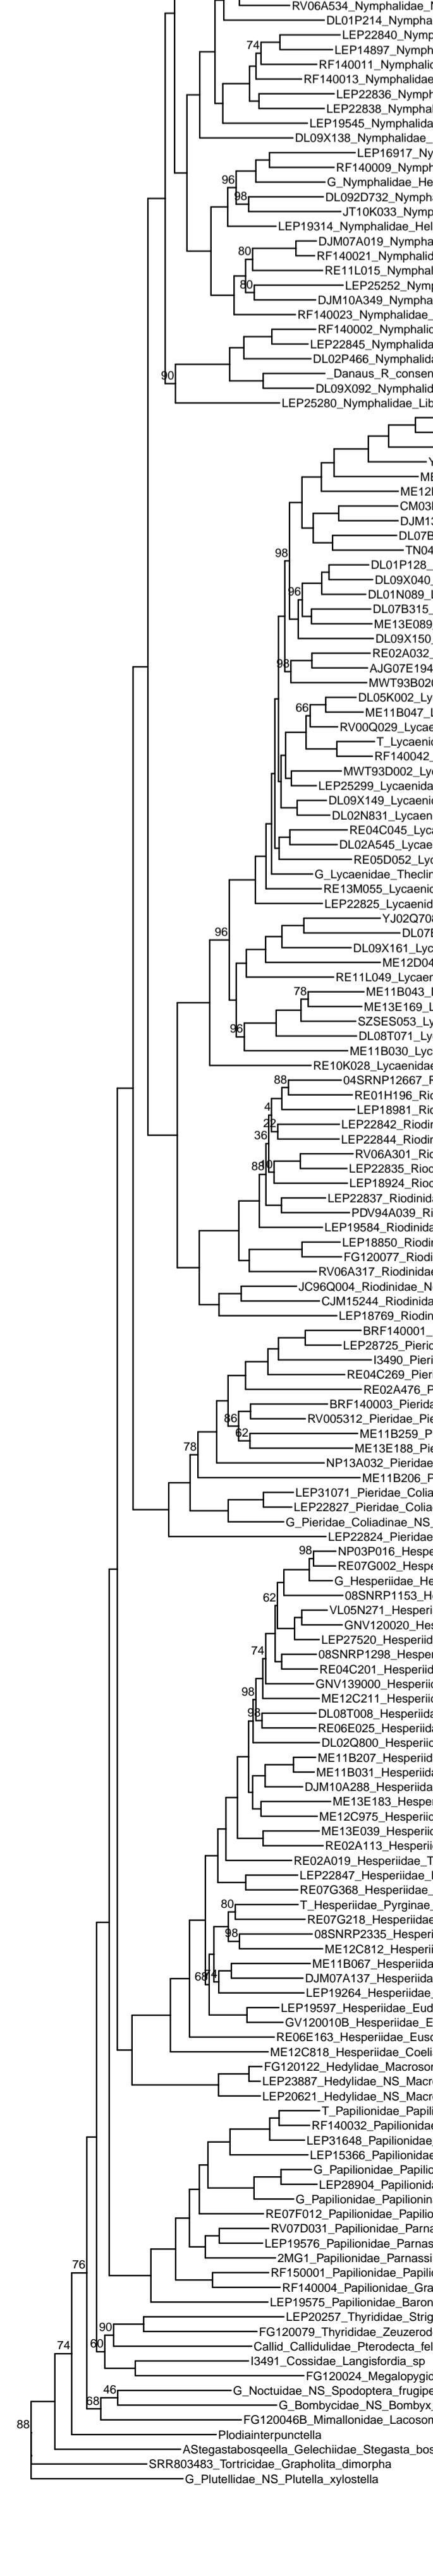

Lizard\_iqtree\_run1\_Concatenation\_ML

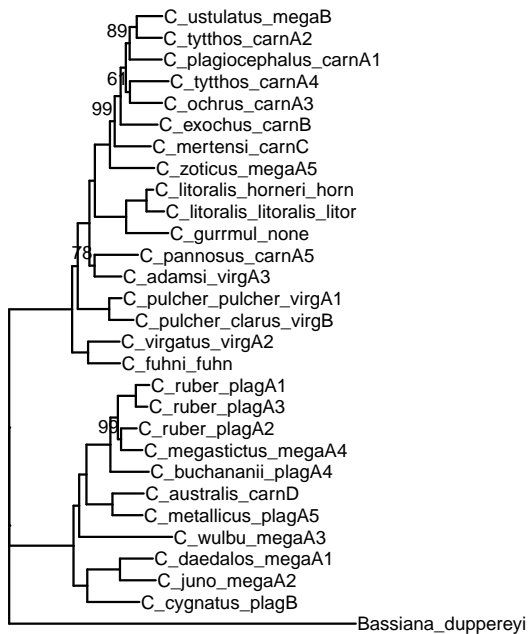

Lizard\_iqtree\_run2\_Concatenation\_ML

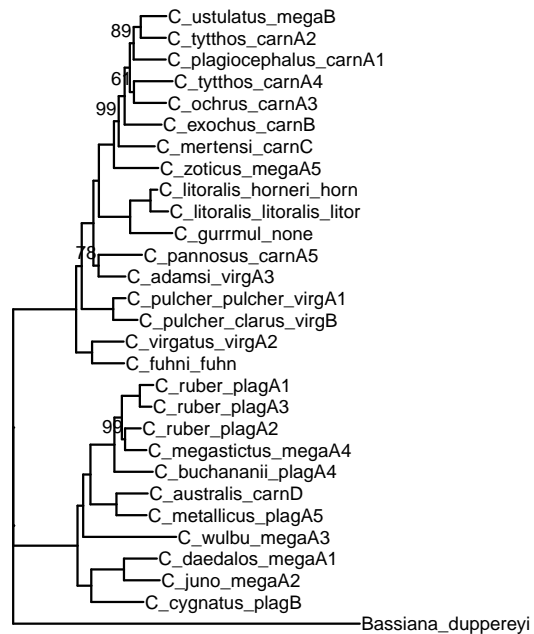

Lizard\_raxml\_ng\_run1\_Concatenation\_ML

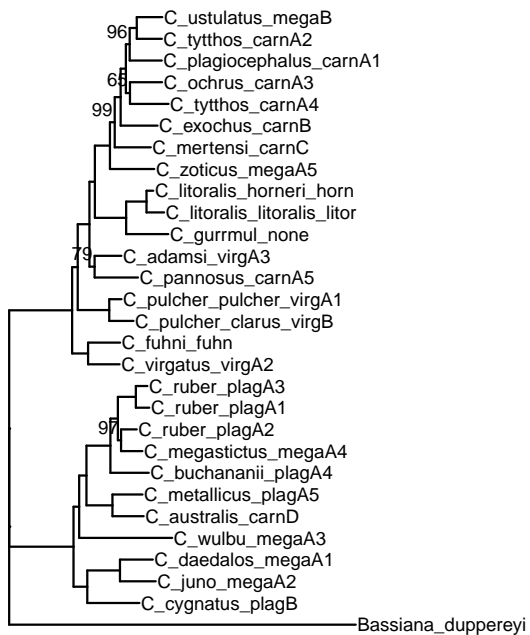

Lizard\_raxml\_ng\_run2\_Concatenation\_ML

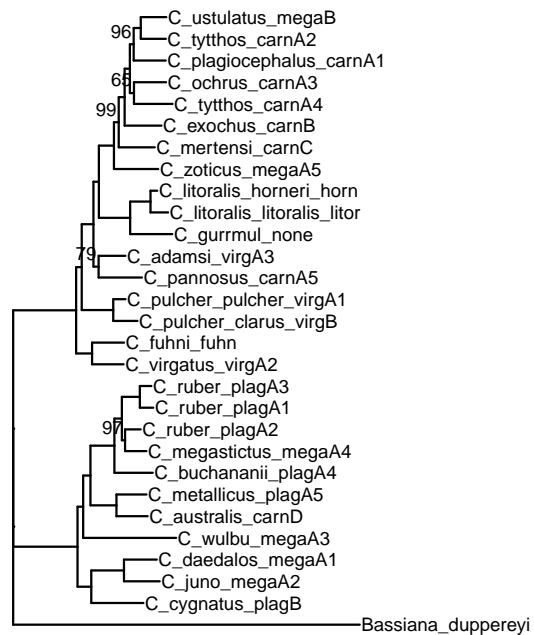

Marine\_fish\_iqtree\_run1\_Concatenation\_ML

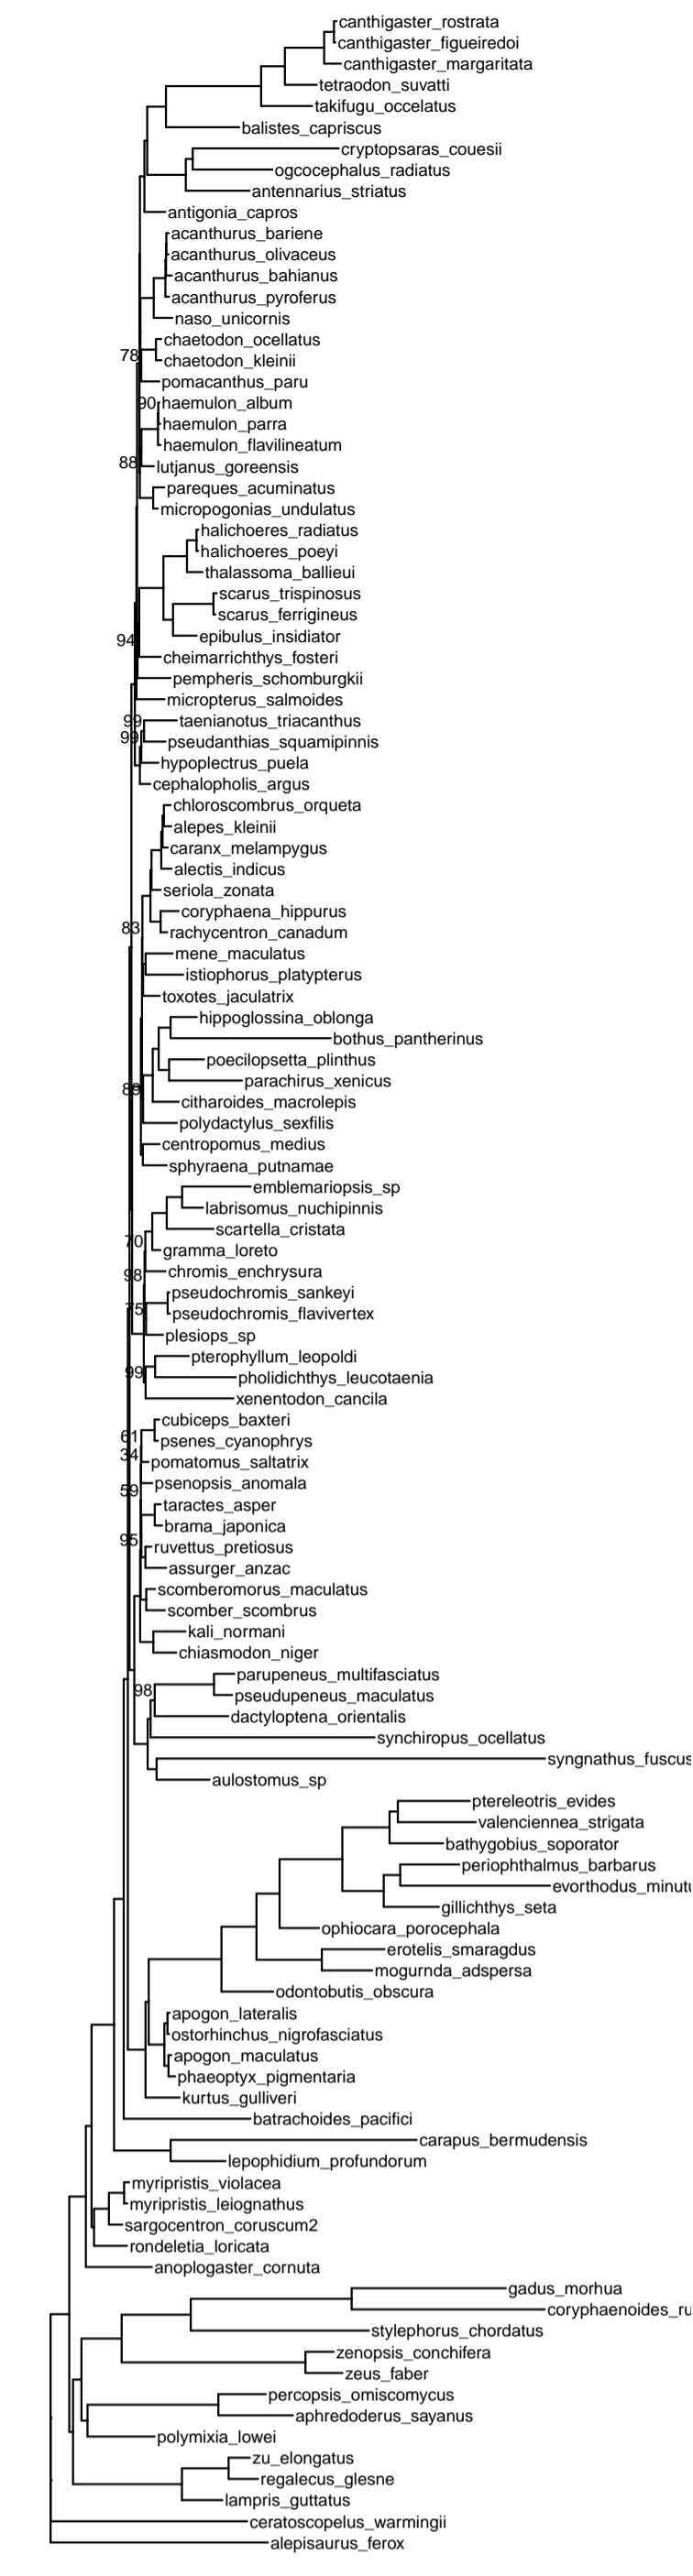

Marine\_fish\_iqtree\_run2\_Concatenation\_ML

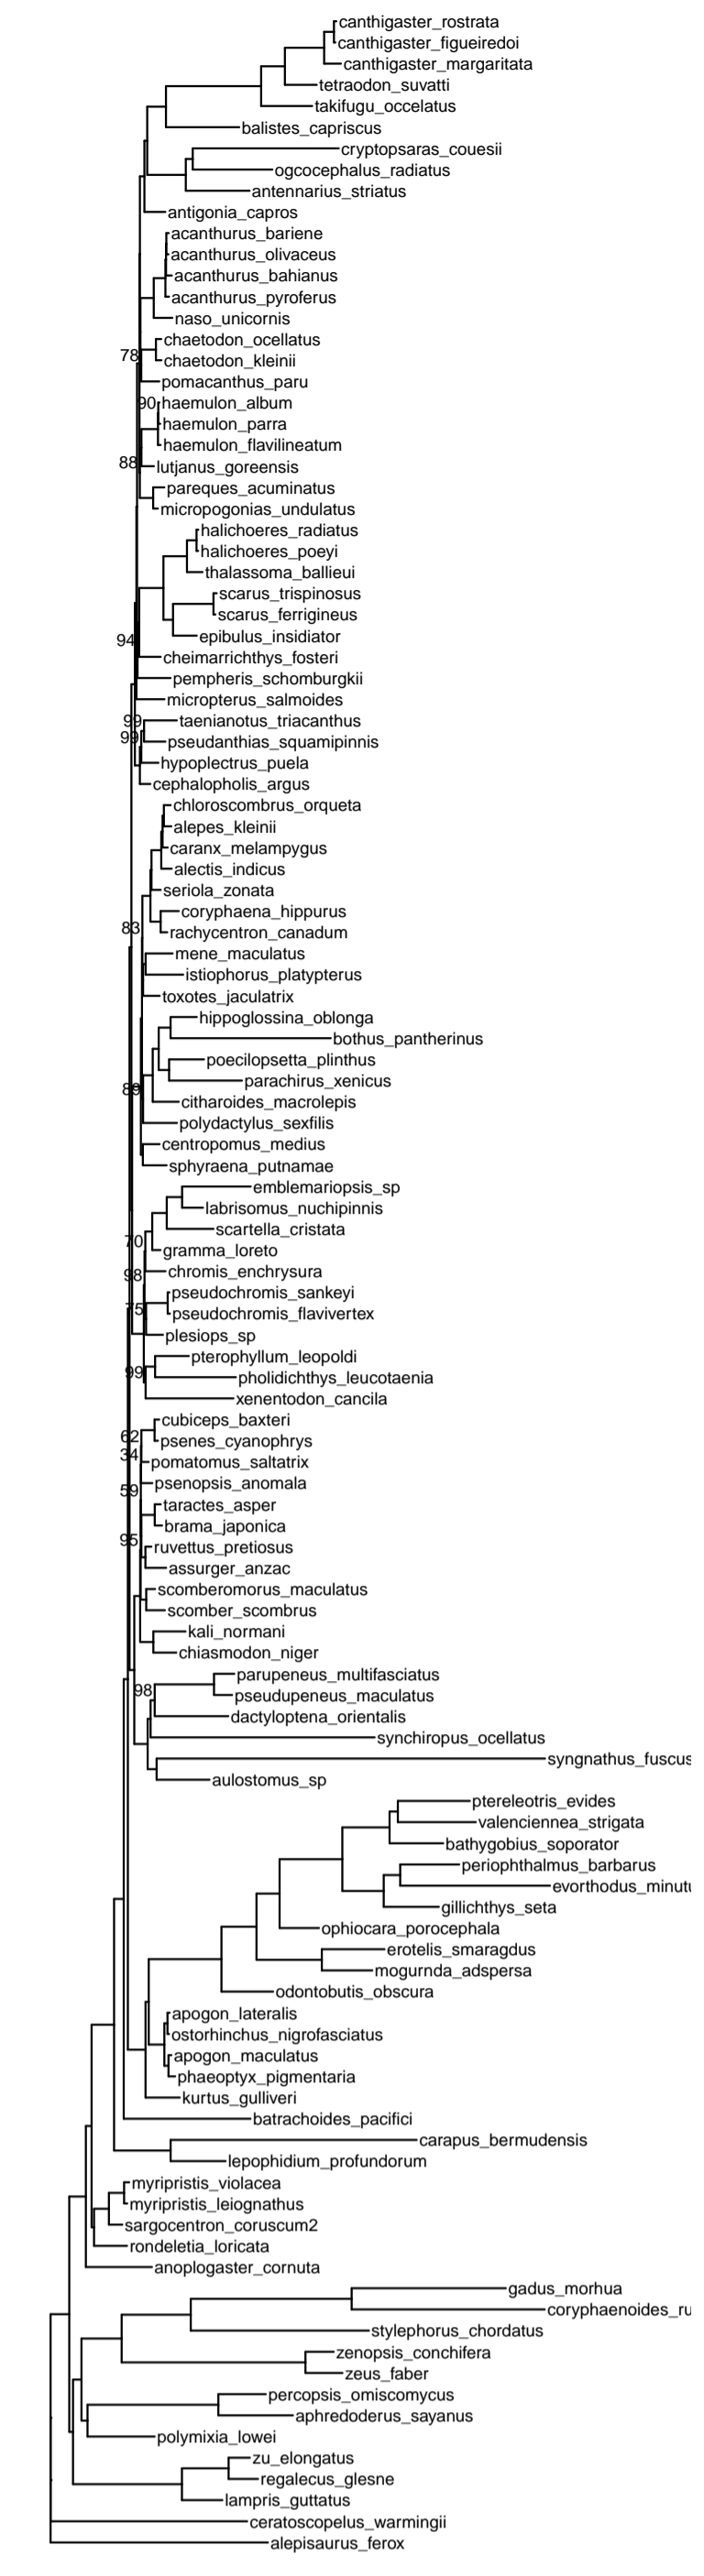

Marine\_fish\_raxml\_ng\_run1\_Concatenation\_ML

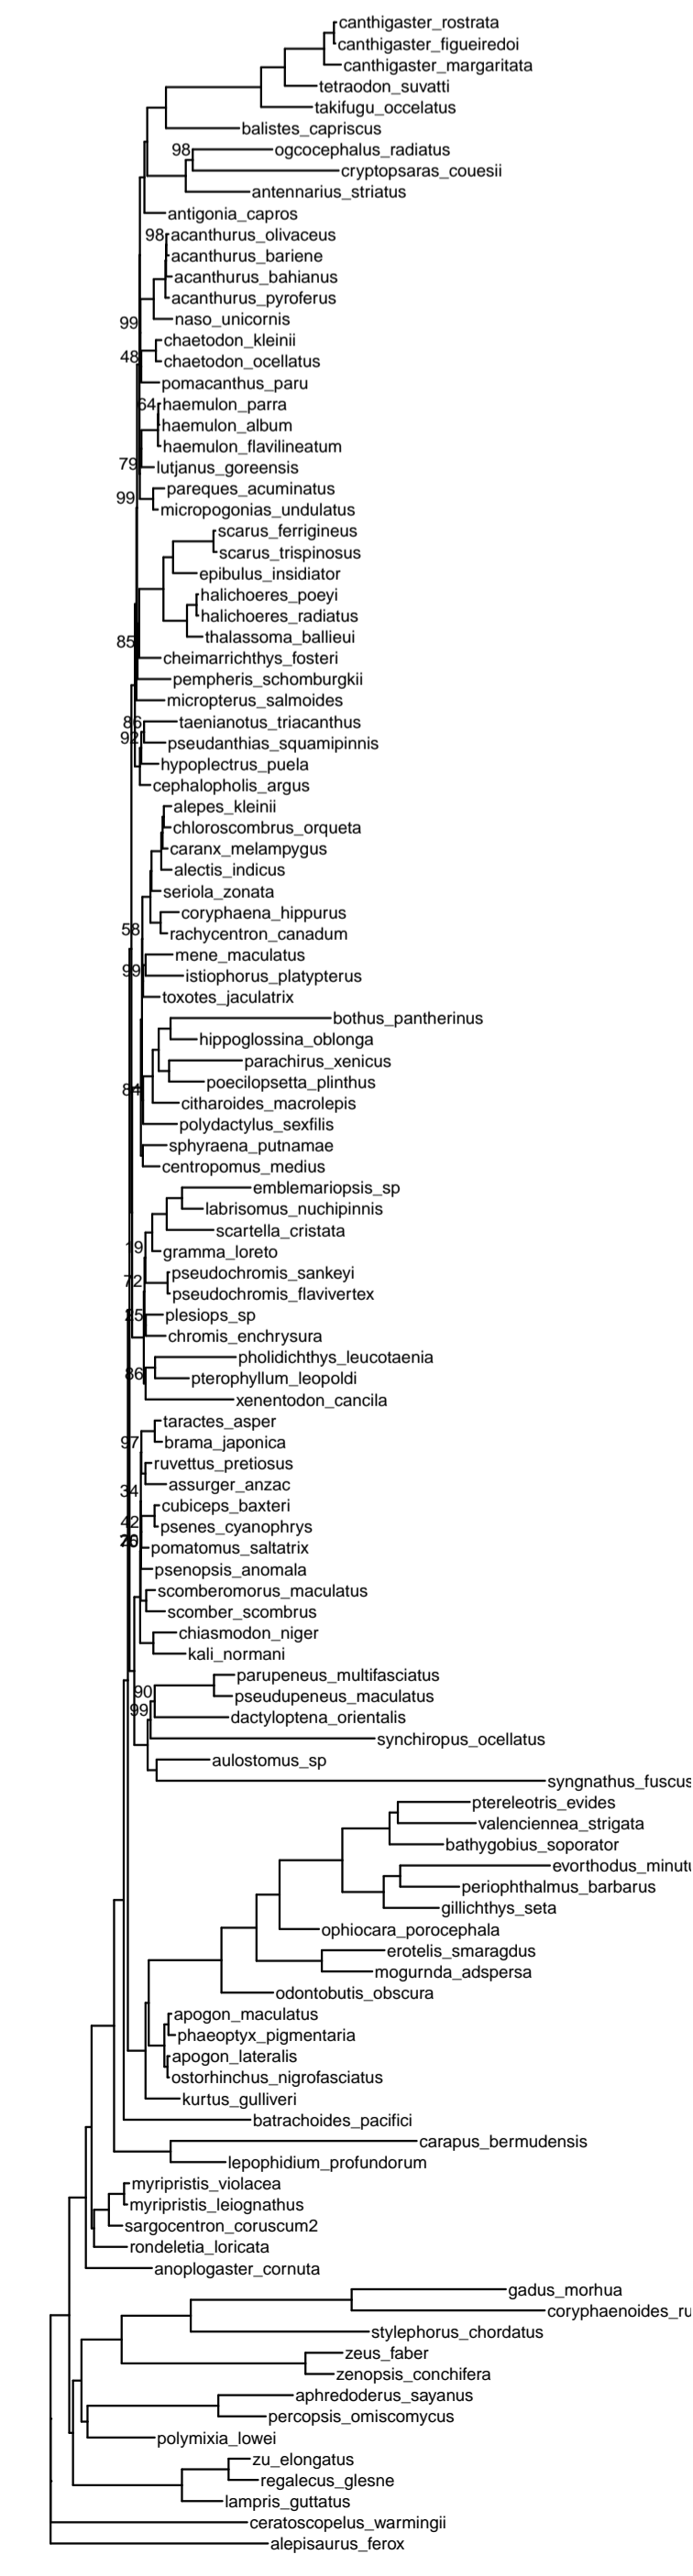

Marine\_fish\_raxml\_ng\_run2\_Concatenation\_ML

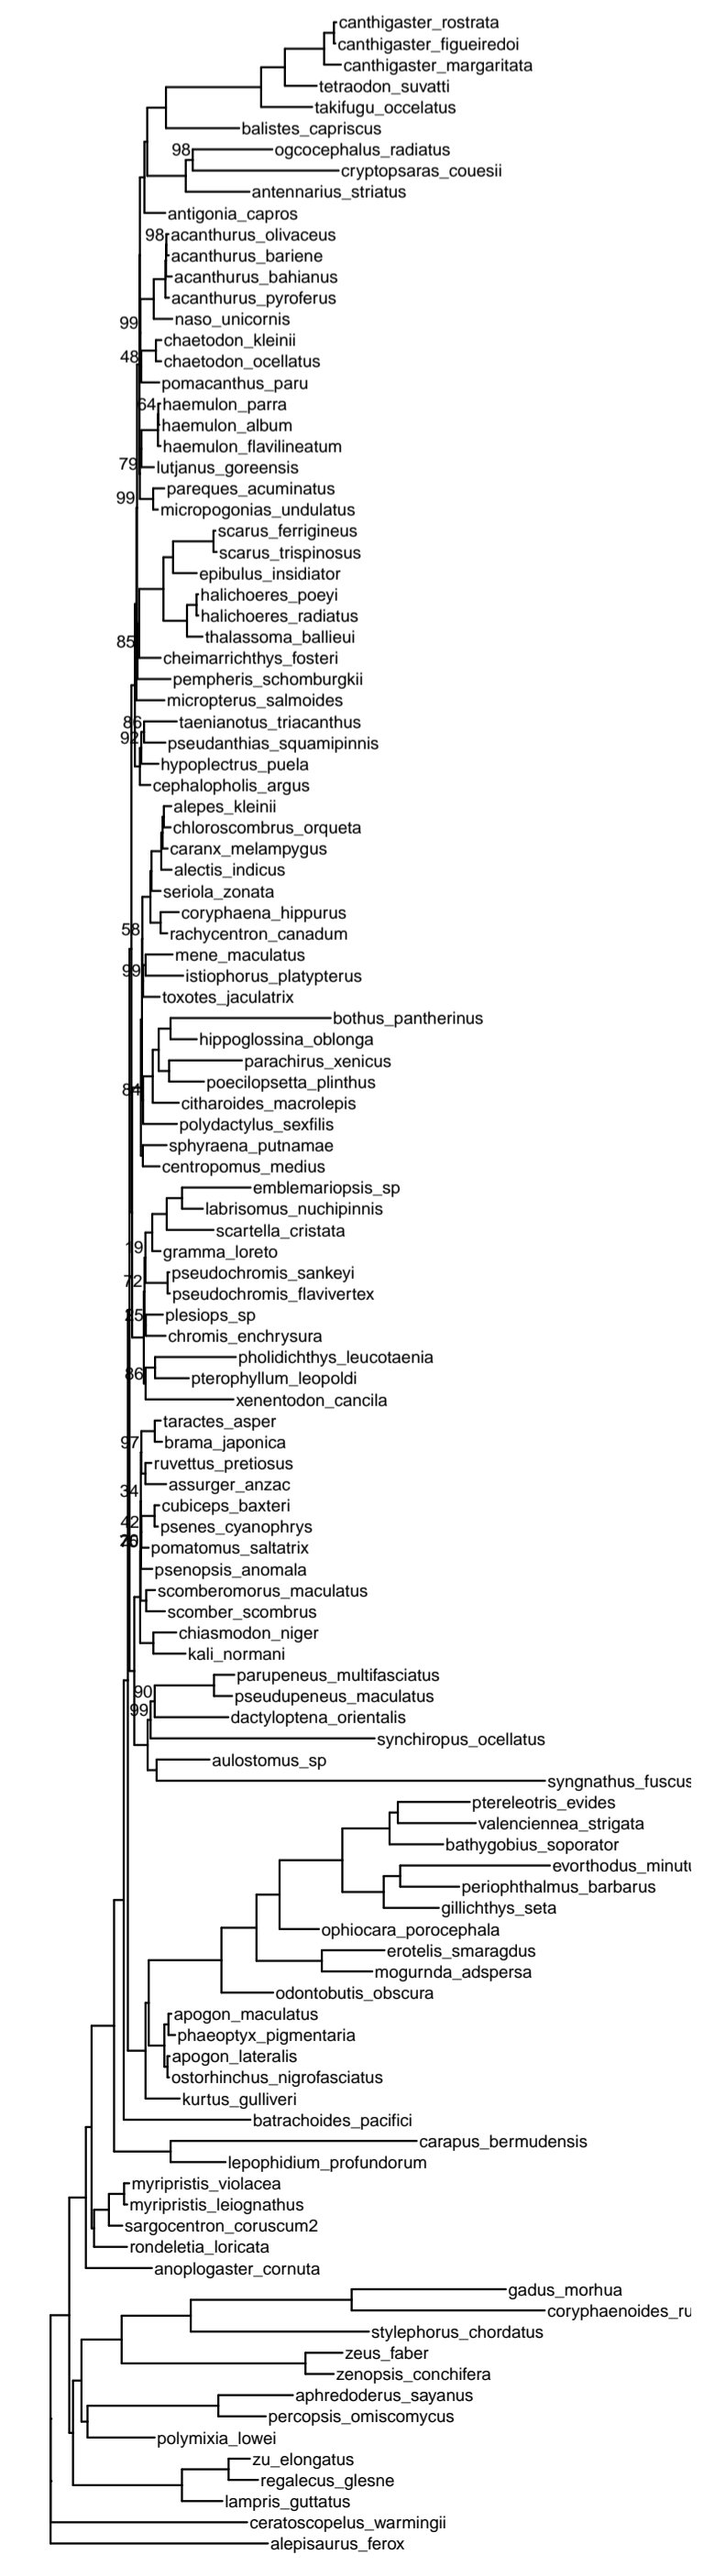



Rodents\_iqtree\_run1\_Concatenation\_ML

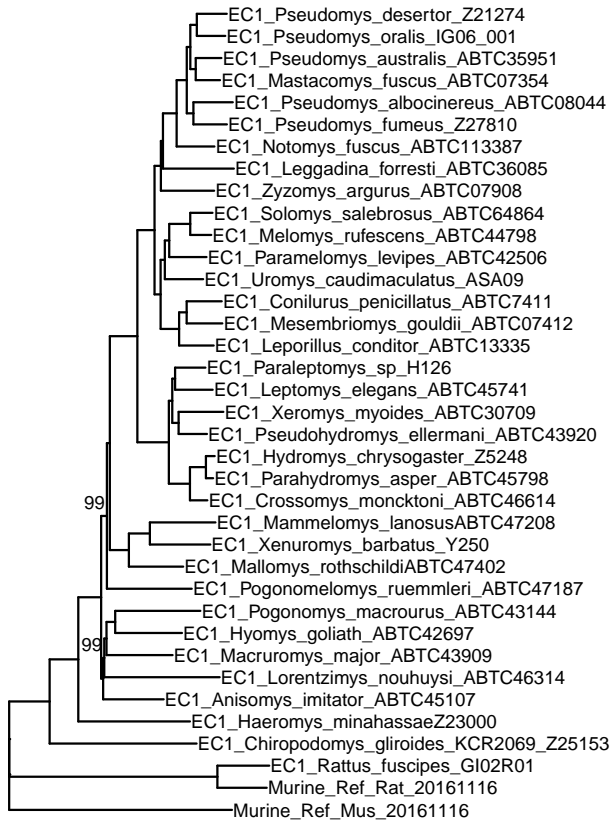

Rodents\_iqtree\_run2\_Concatenation\_ML

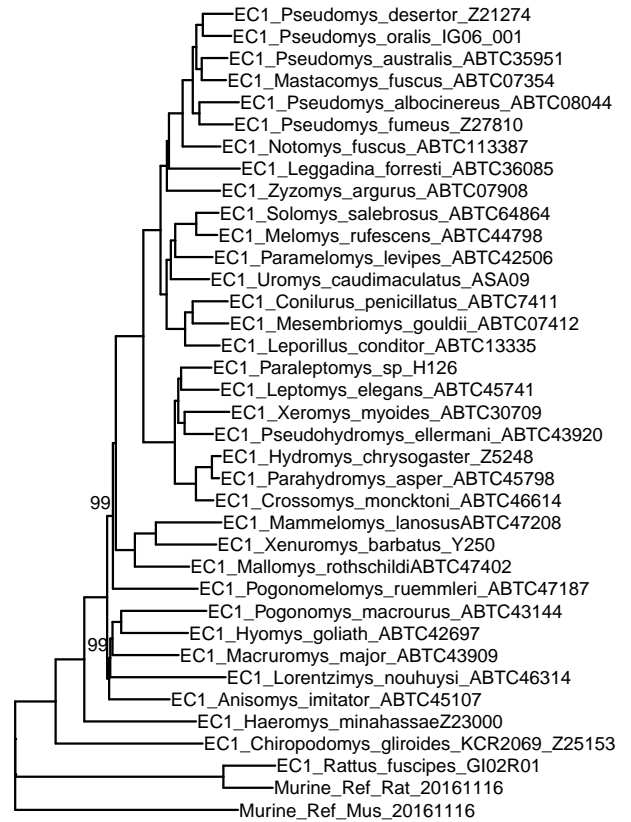

Rodents\_raxml\_ng\_run1\_Concatenation\_ML

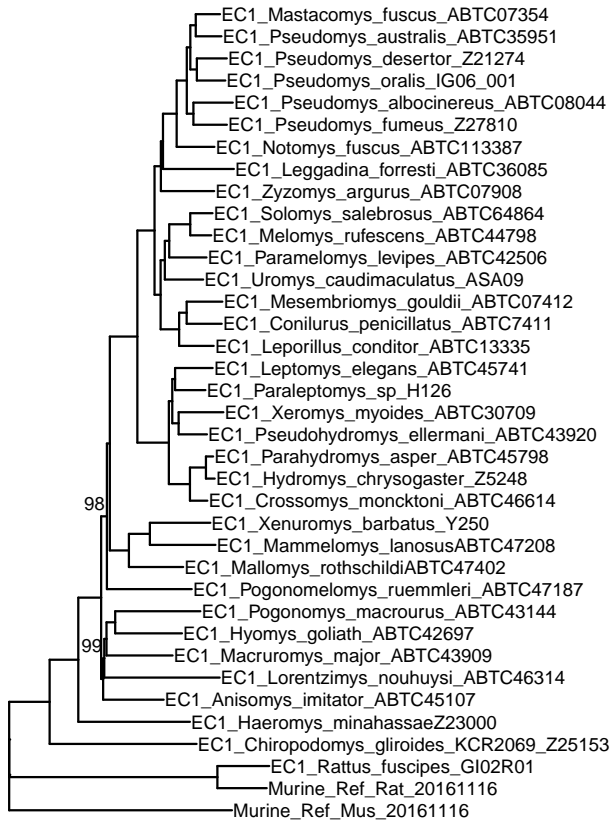

Rodents\_raxml\_ng\_run2\_Concatenation\_ML

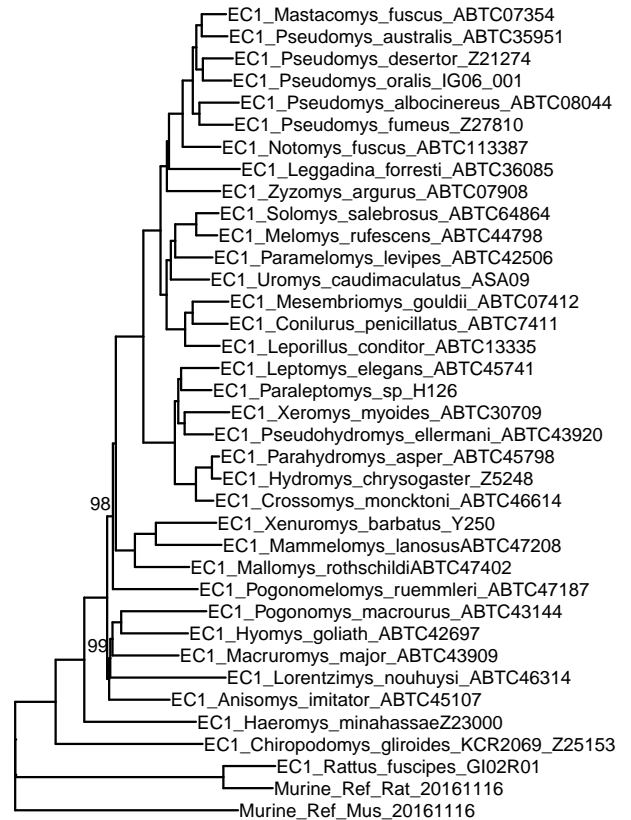

Cardueae\_iqtree\_run1\_Concatenation\_ML

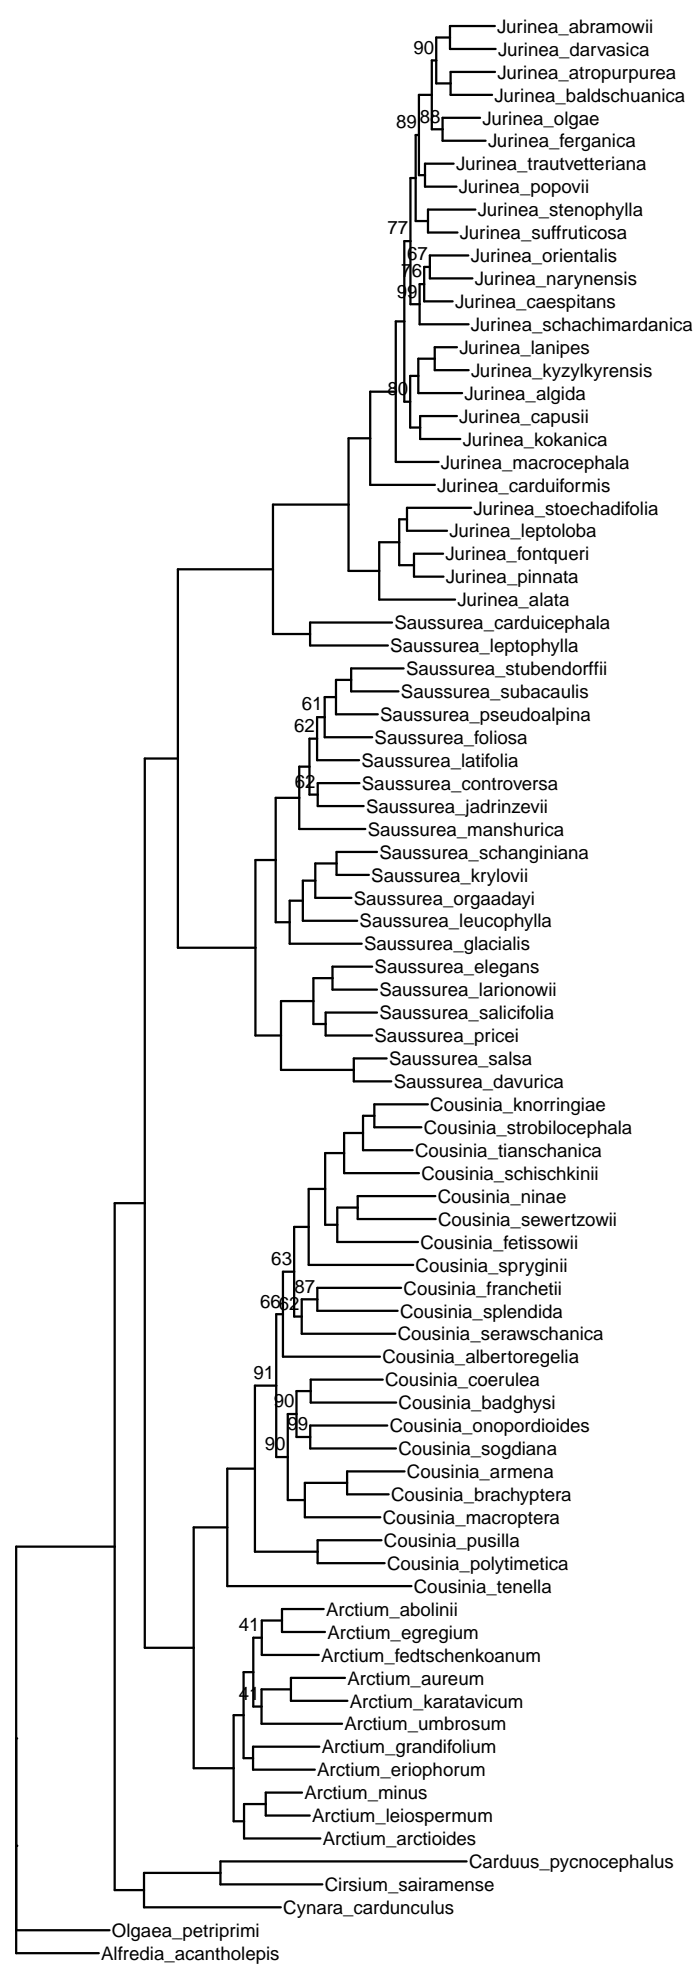

Cardueae\_iqtree\_run2\_Concatenation\_ML

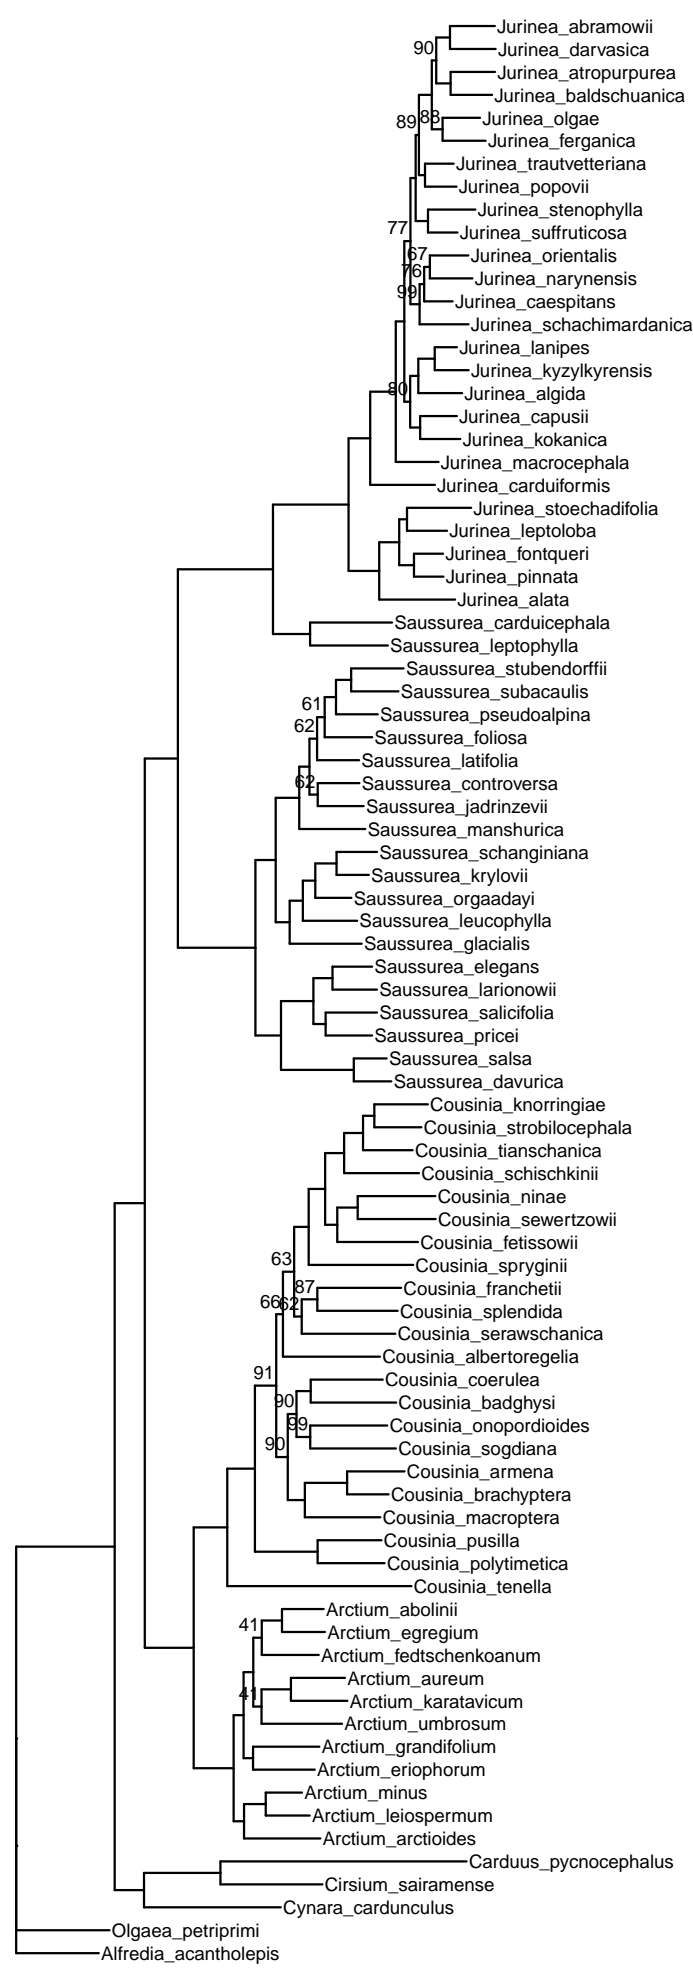

Cardueae\_raxml\_ng\_run1\_Concatenation\_ML

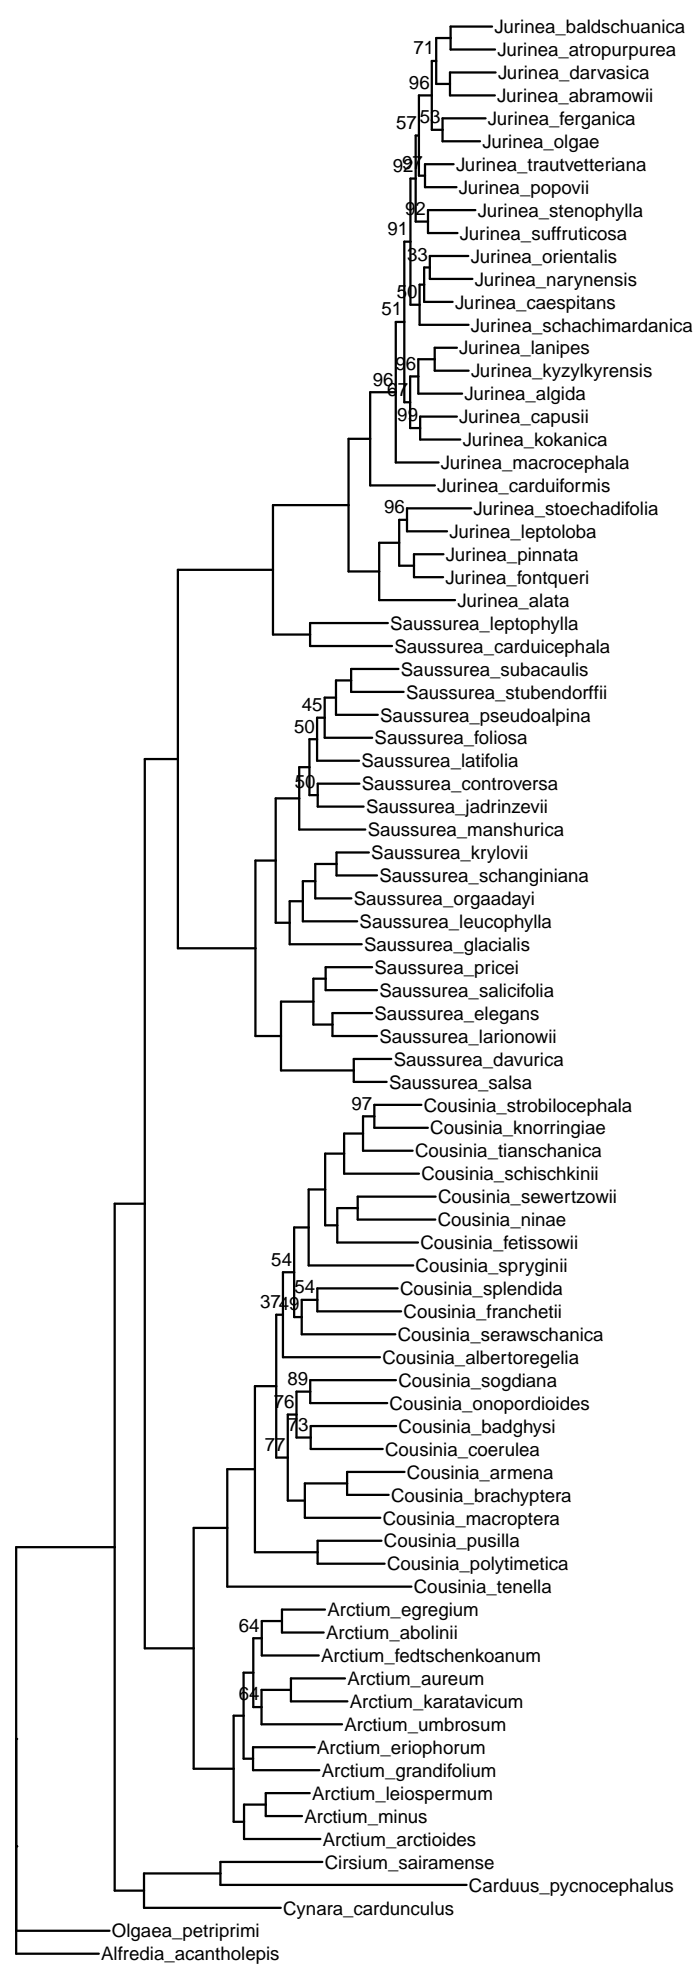

Cardueae\_raxml\_ng\_run2\_Concatenation\_ML

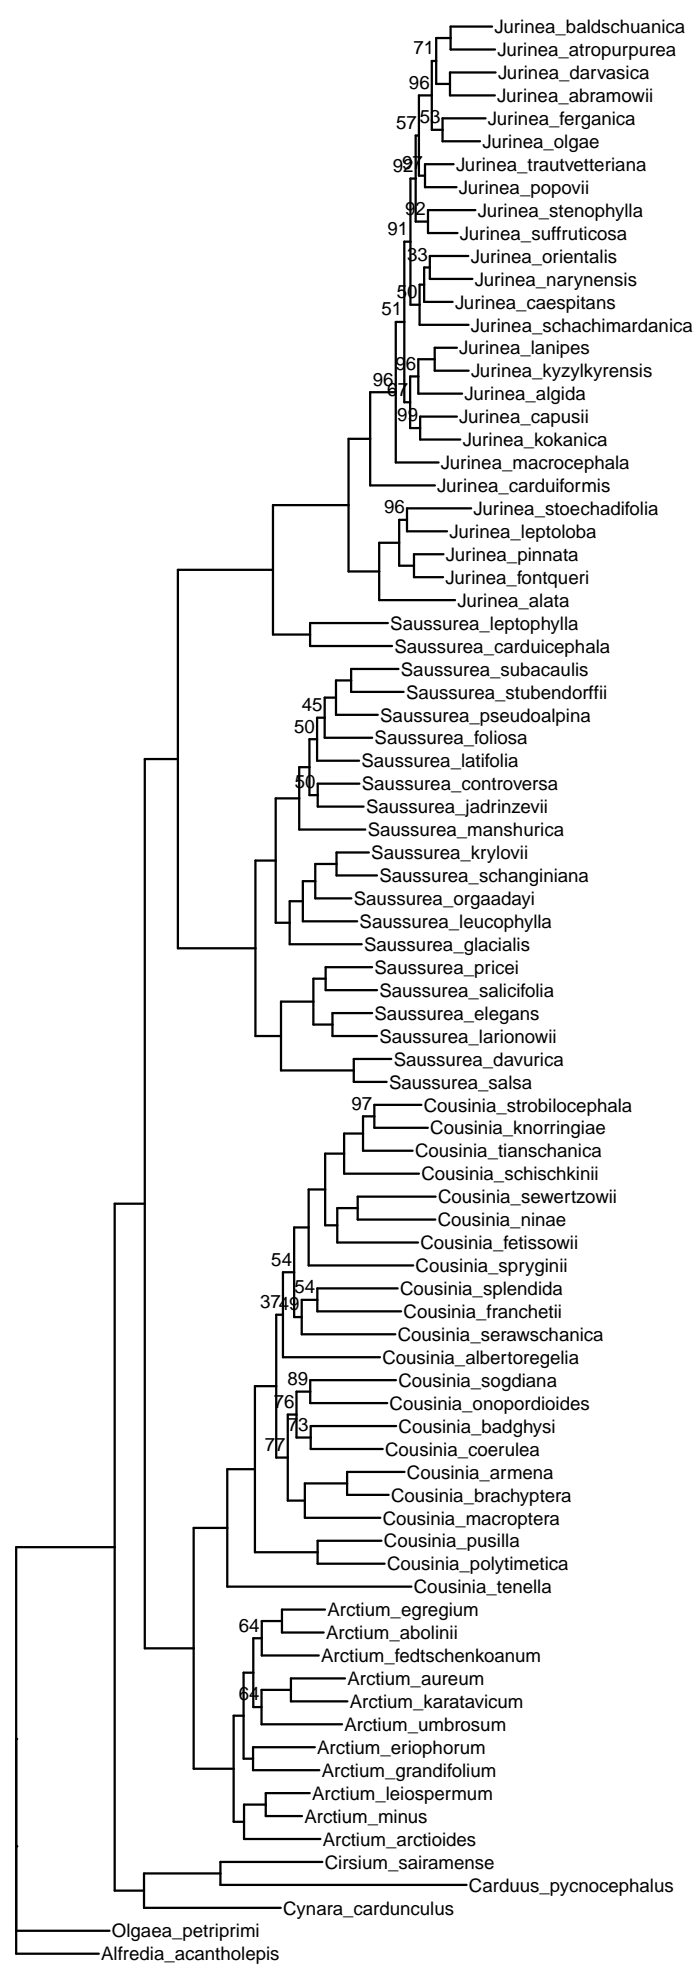

Caryophyllales\_iqtree\_run1\_Concatenation\_ML

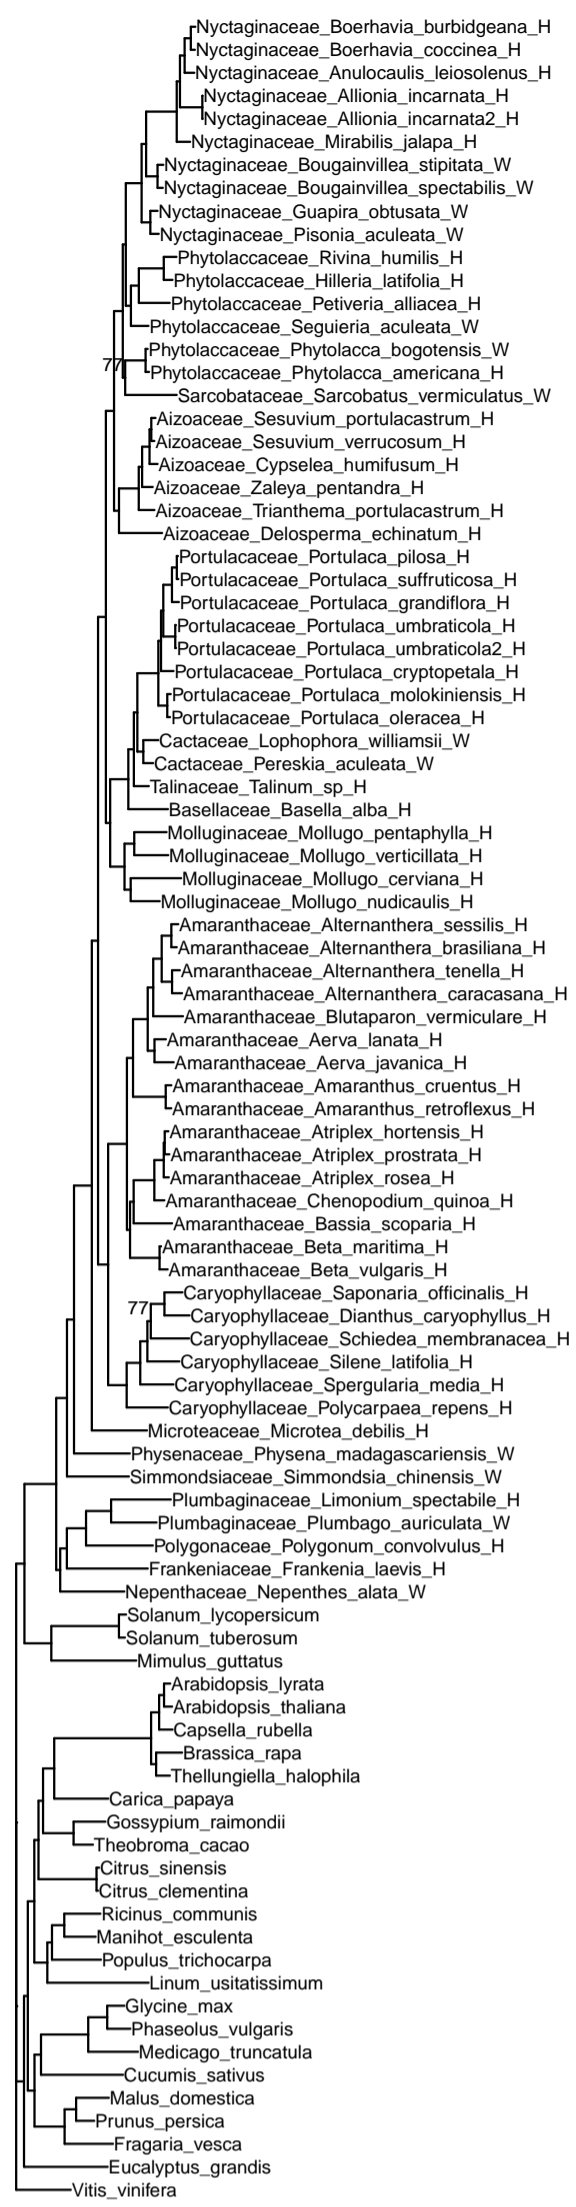

Caryophyllales\_iqtree\_run2\_Concatenation\_ML

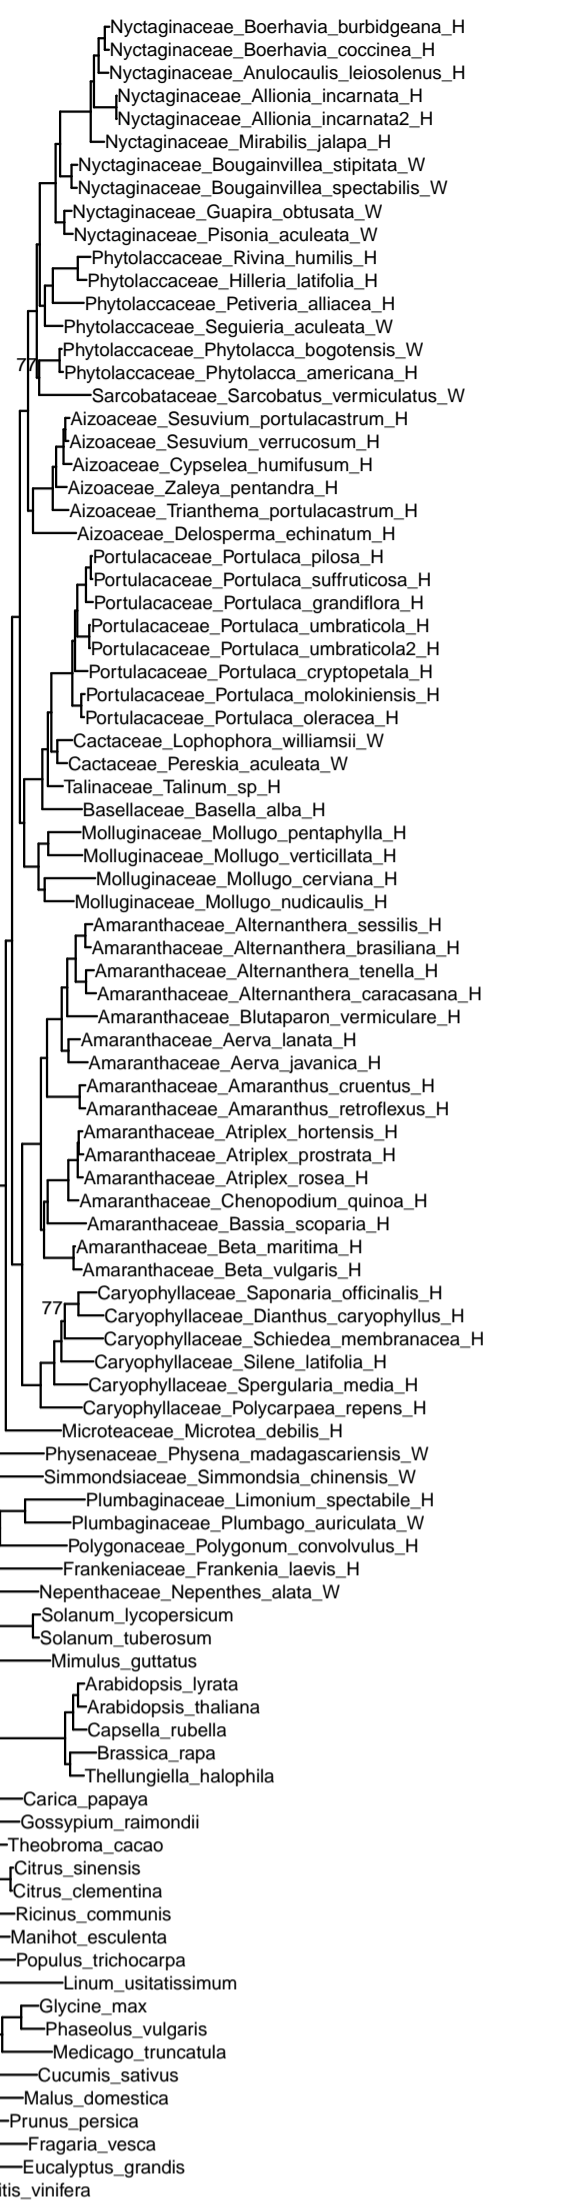

Caryophyllales\_raxml\_ng\_run1\_Concatenation\_I

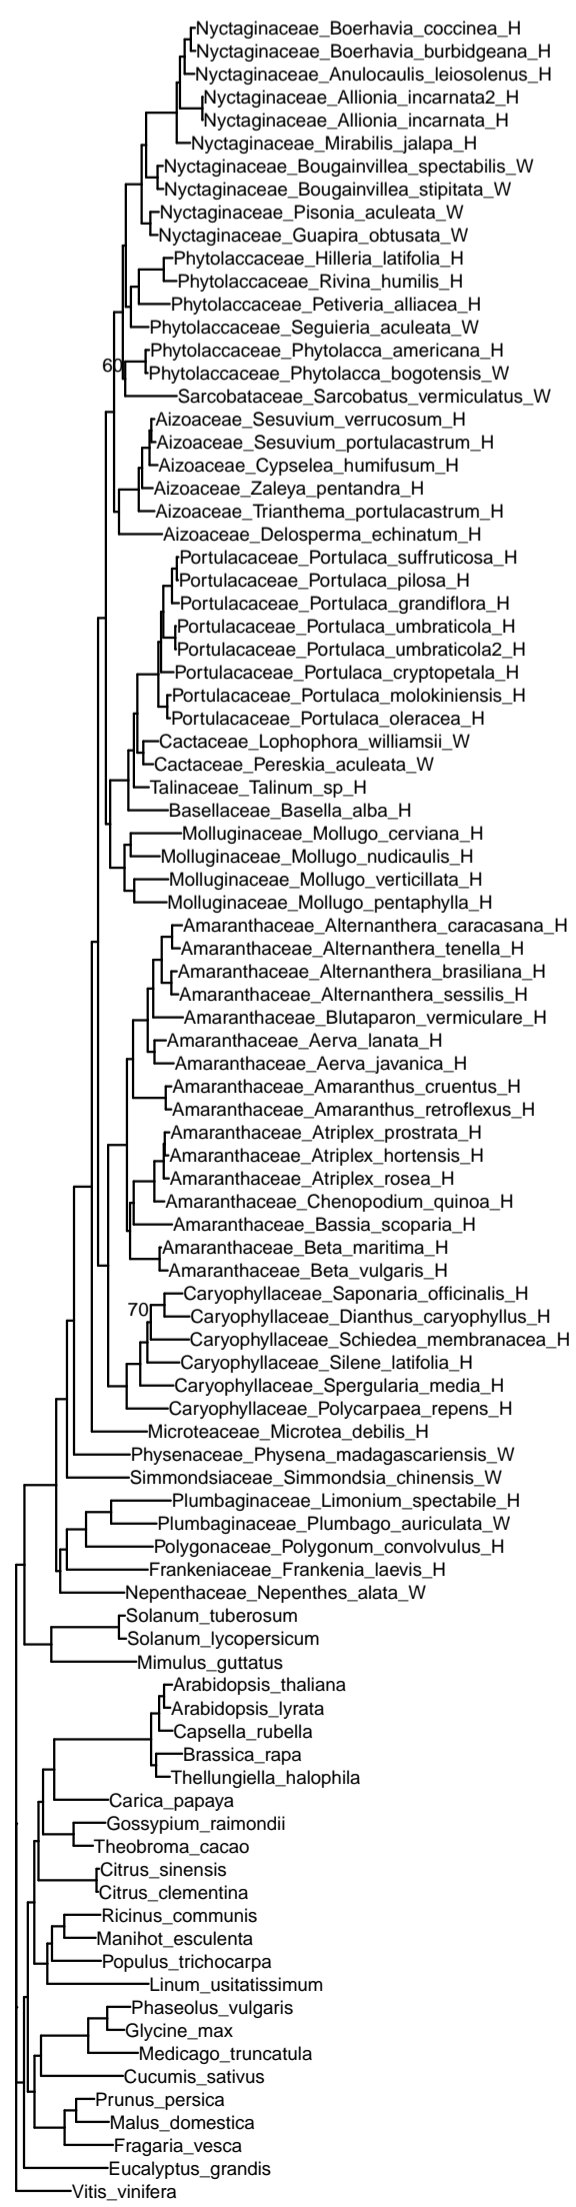

Caryophyllales\_raxml\_ng\_run2\_Concatenation\_I

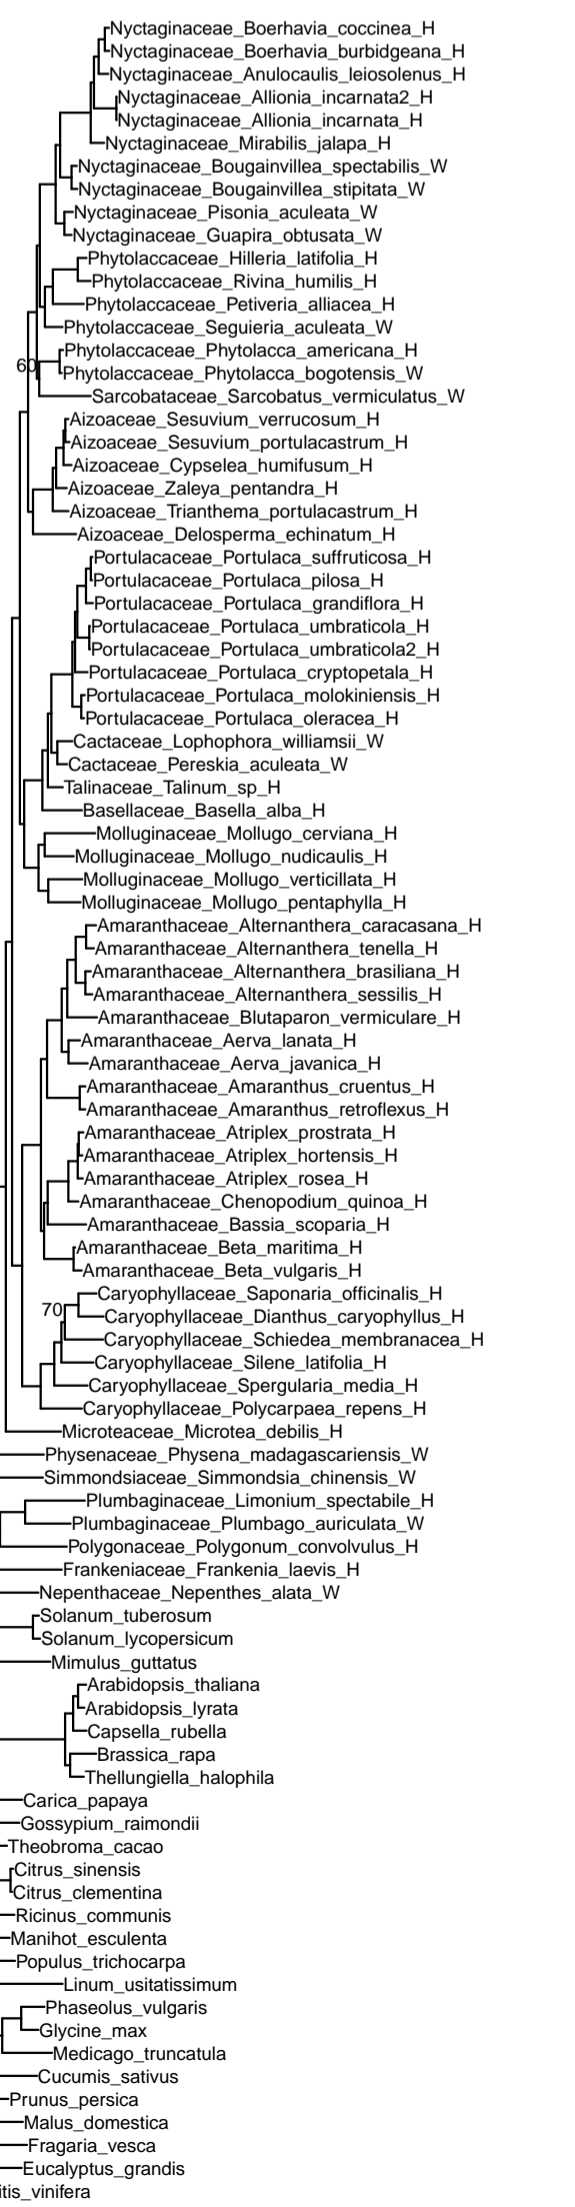

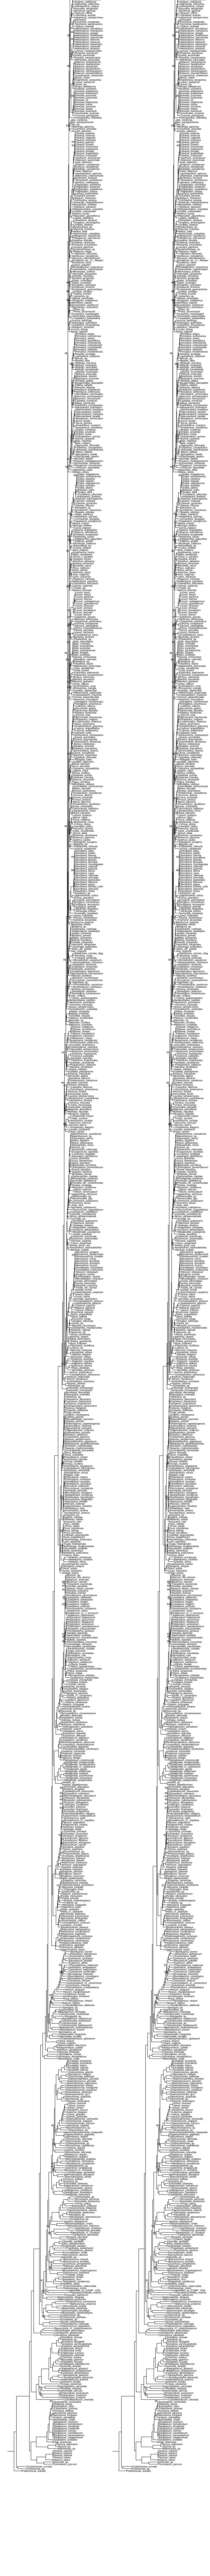





Jaltomata\_iqtree\_run1\_Concatenation\_ML

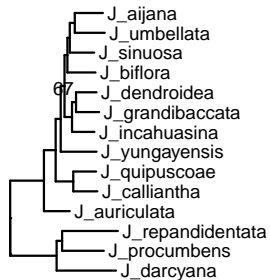

Jaltomata\_iqtree\_run2\_Concatenation\_ML

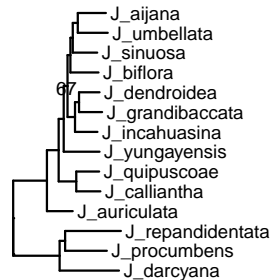

Jaltomata\_raxml\_ng\_run1\_Concatenation\_ML

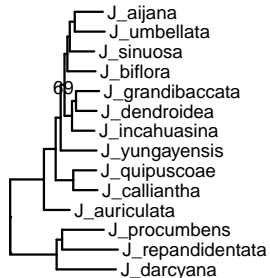

Jaltomata\_raxml\_ng\_run2\_Concatenation\_ML

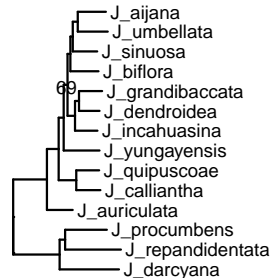

Protea\_iqtree\_run1\_Concatenation\_ML

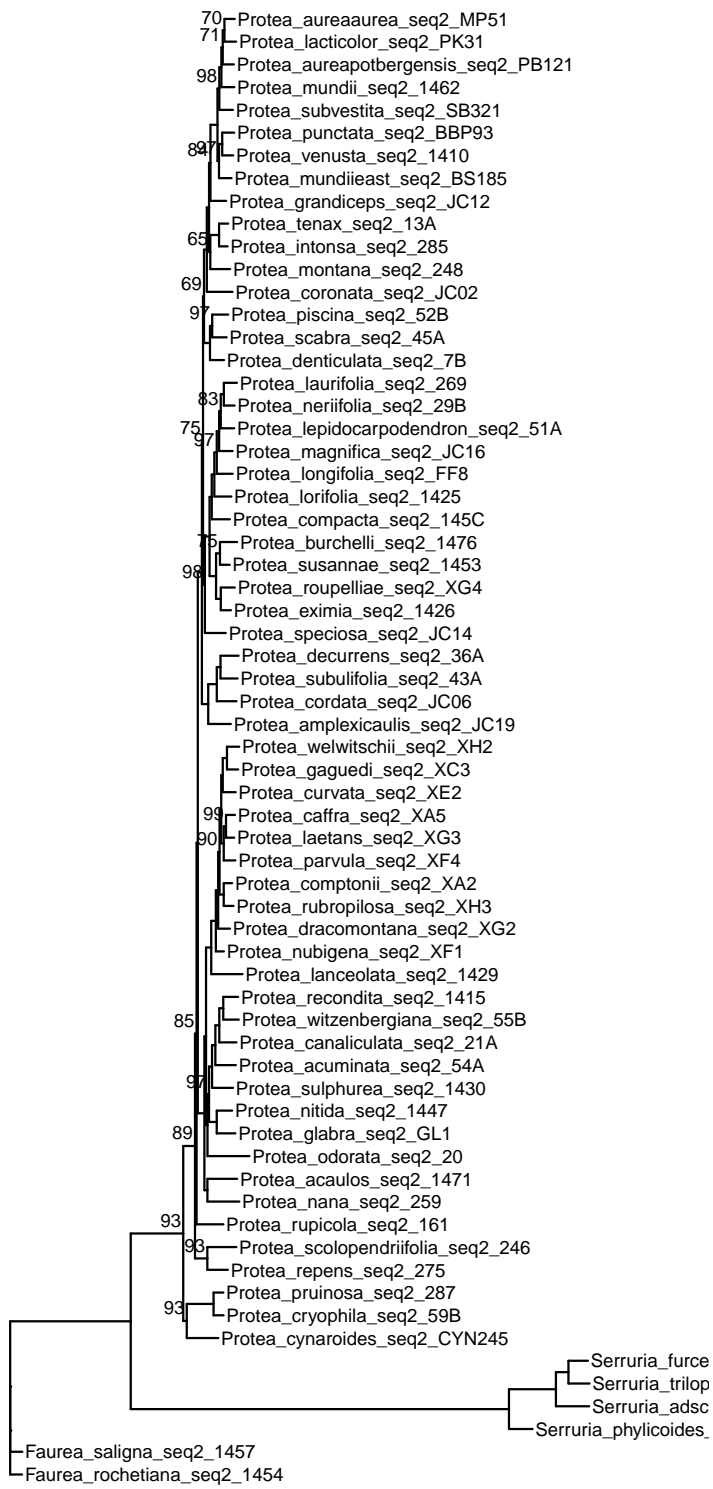

Protea\_iqtree\_run2\_Concatenation\_ML

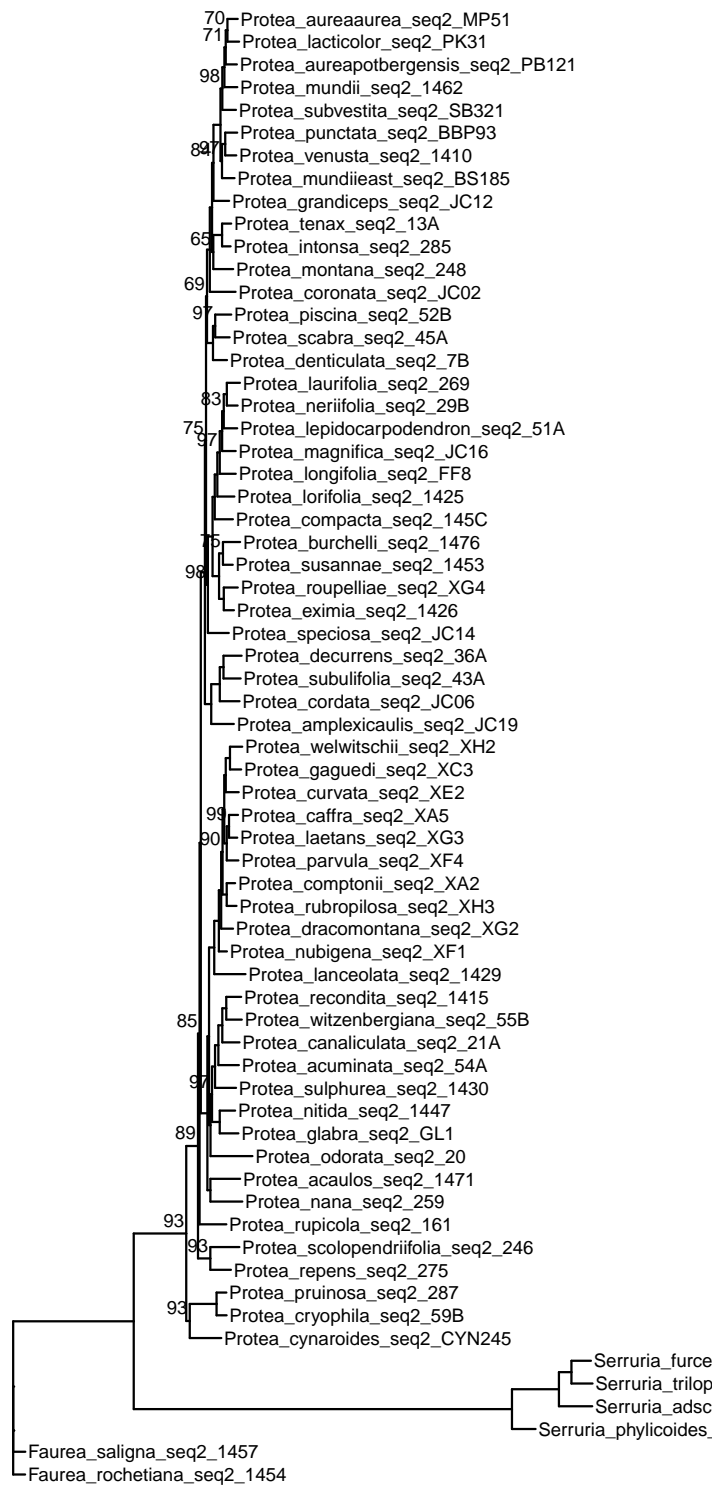

Protea\_raxml\_ng\_run1\_Concatenation\_ML

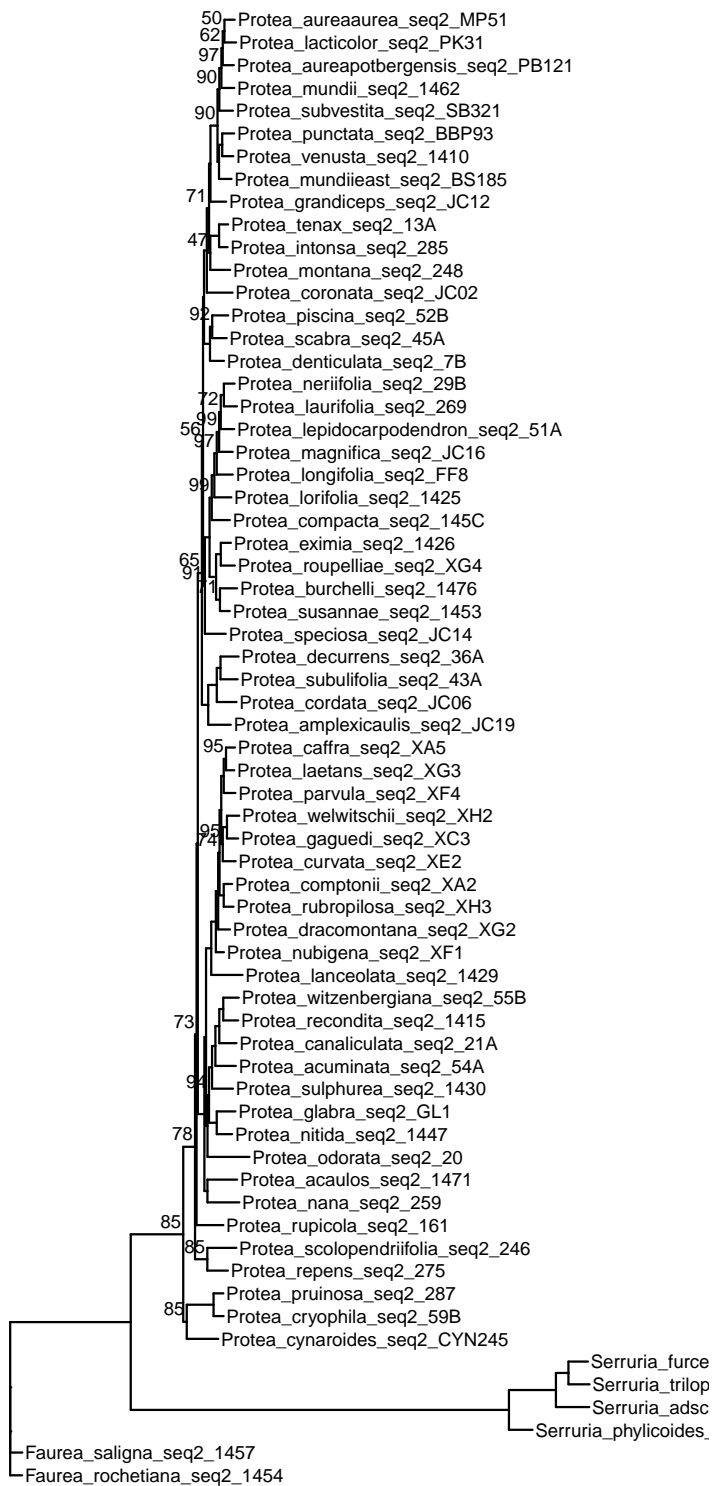

Protea\_raxml\_ng\_run2\_Concatenation\_ML

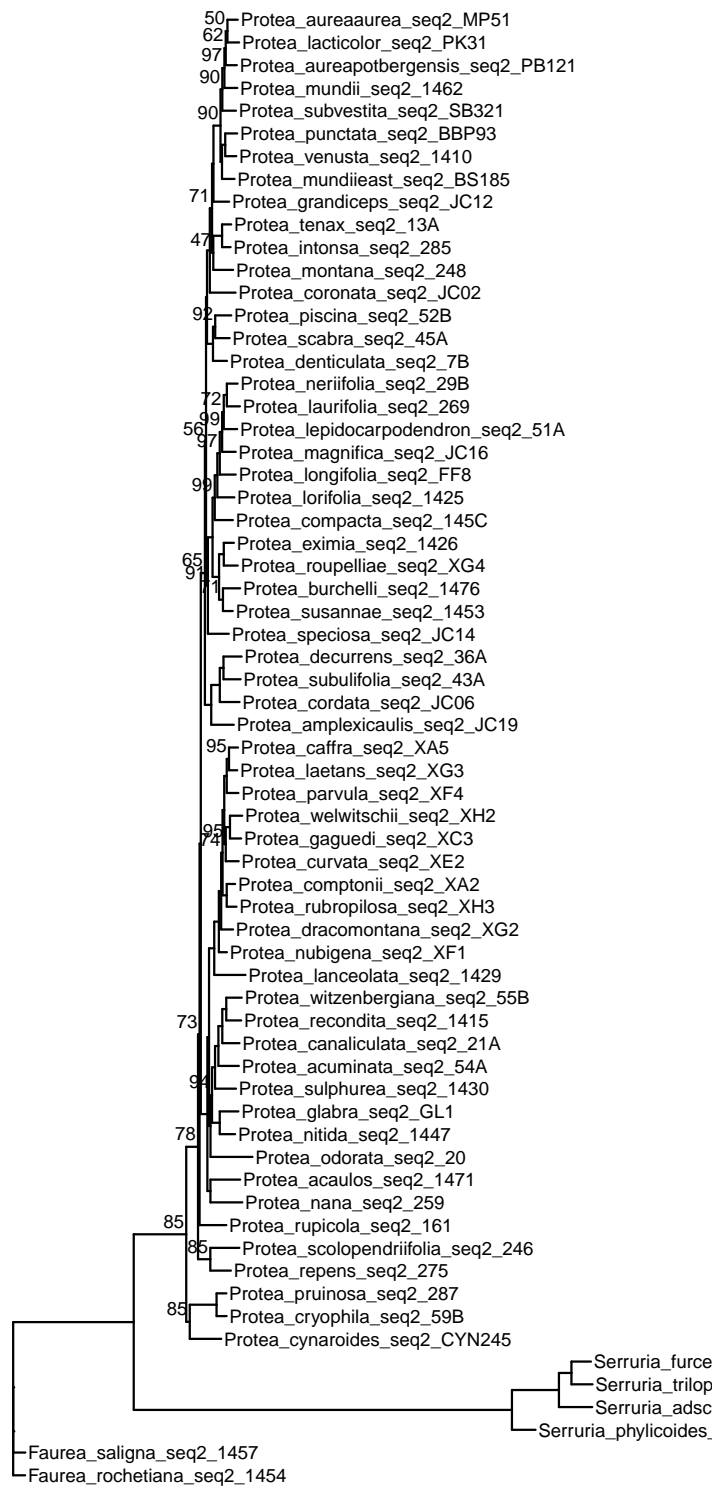

Aspergillaceae\_iqtree\_run1\_Concatenation\_ML

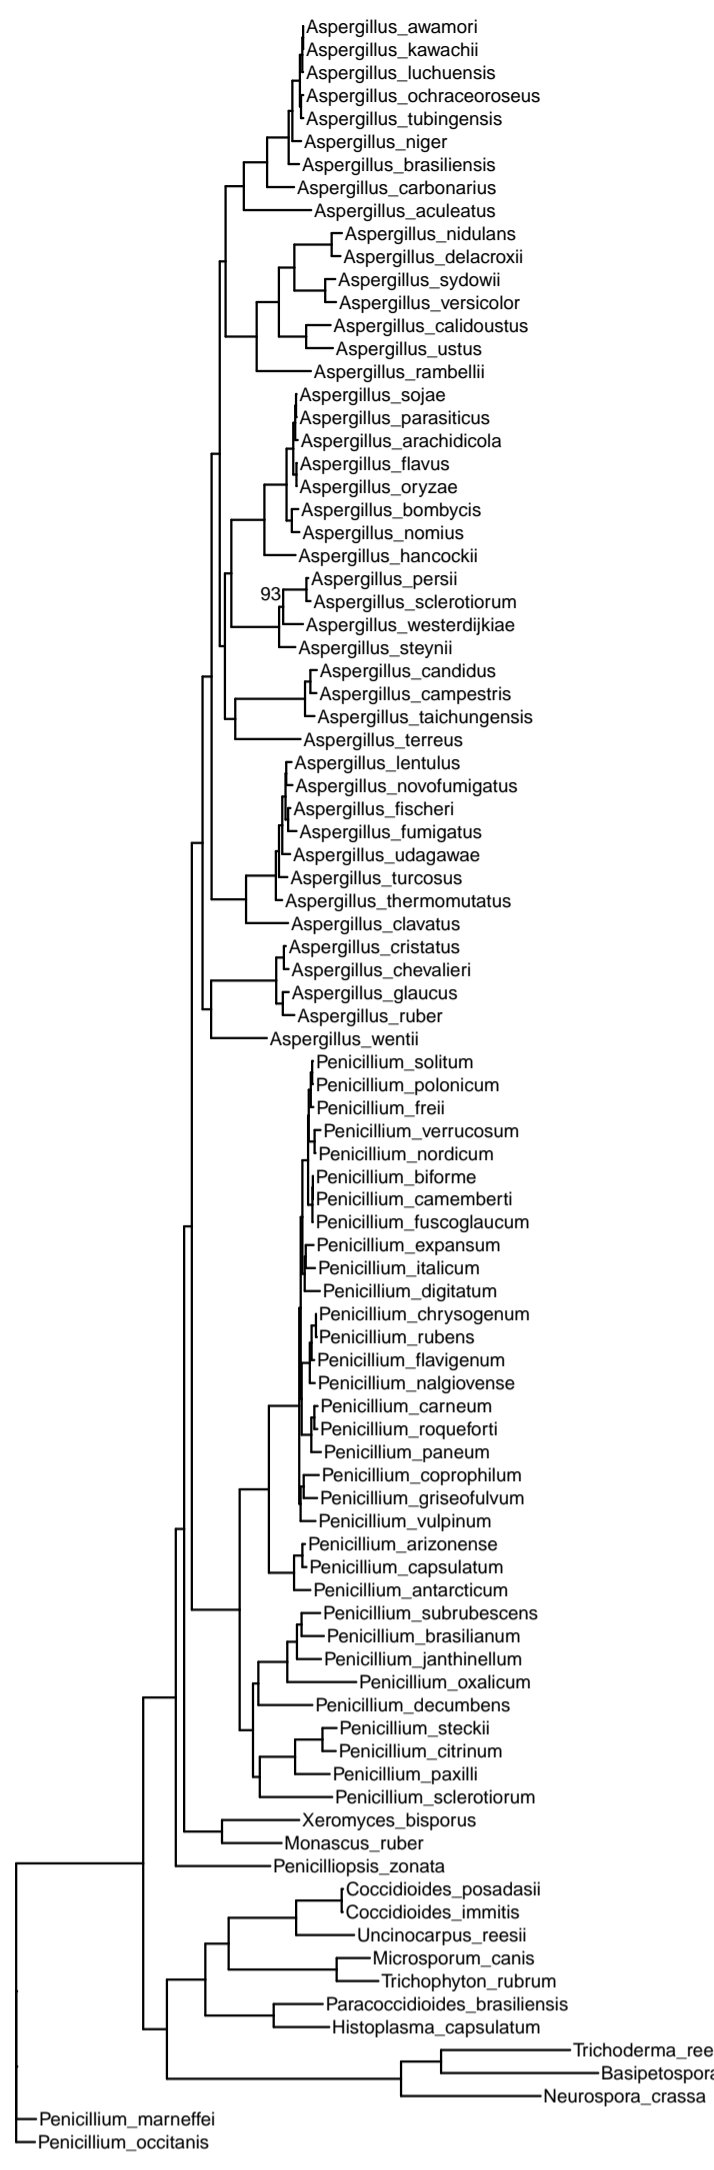

Aspergillaceae\_iqtree\_run2\_Concatenation\_ML

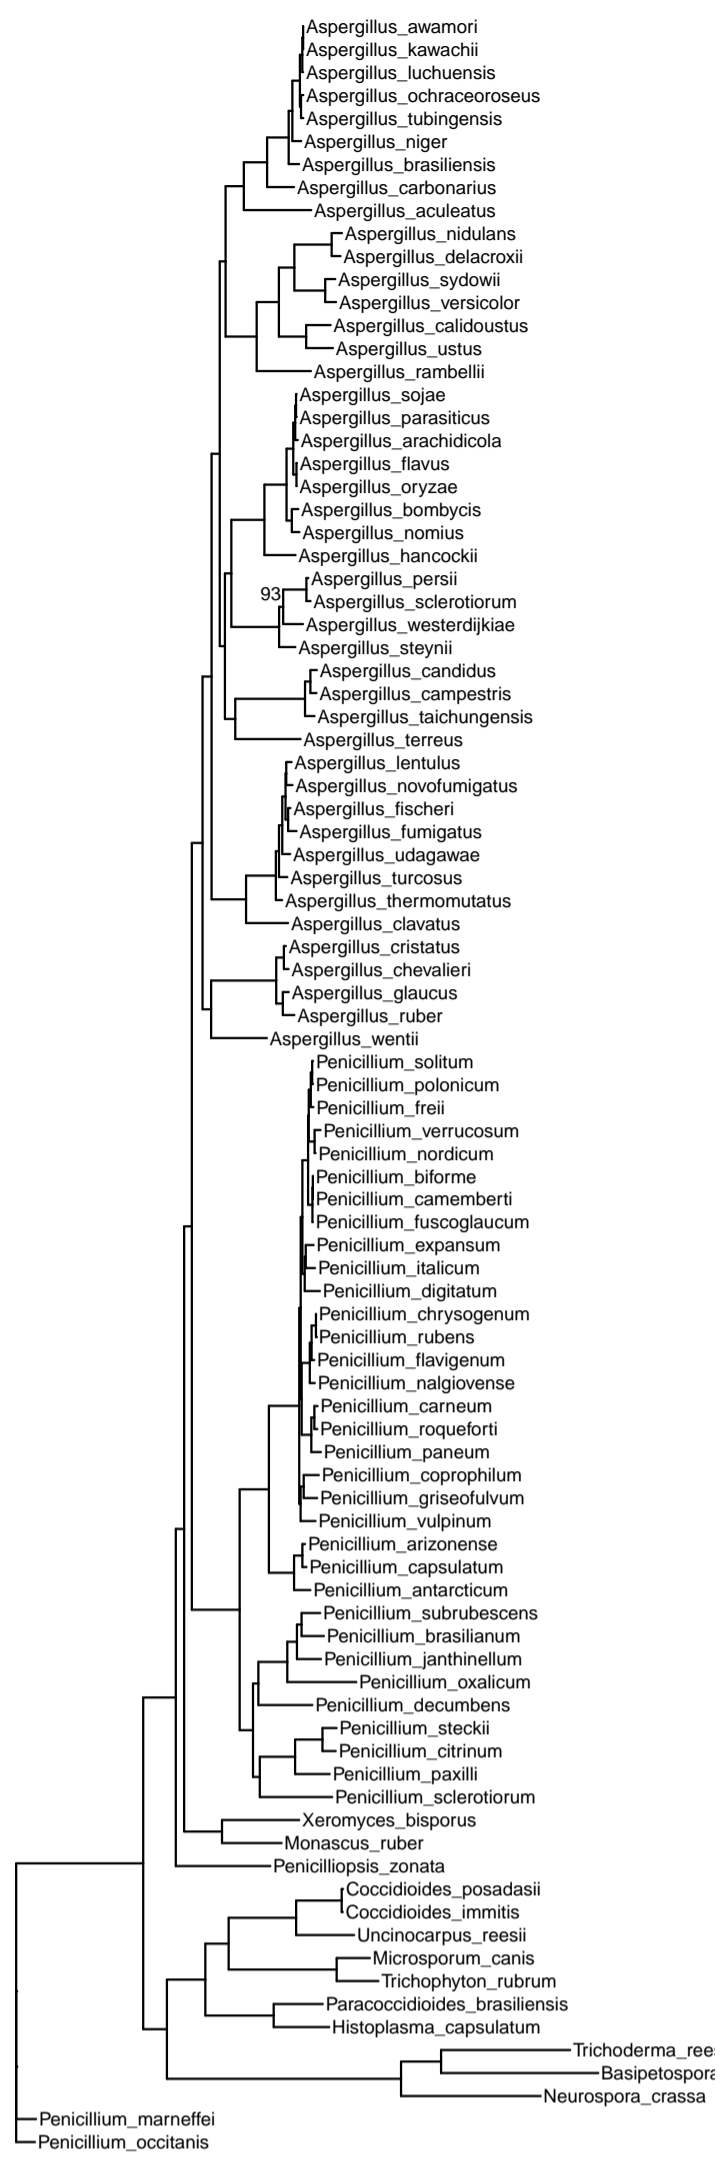

Aspergillaceae\_raxml\_ng\_run1\_Concatenation\_I

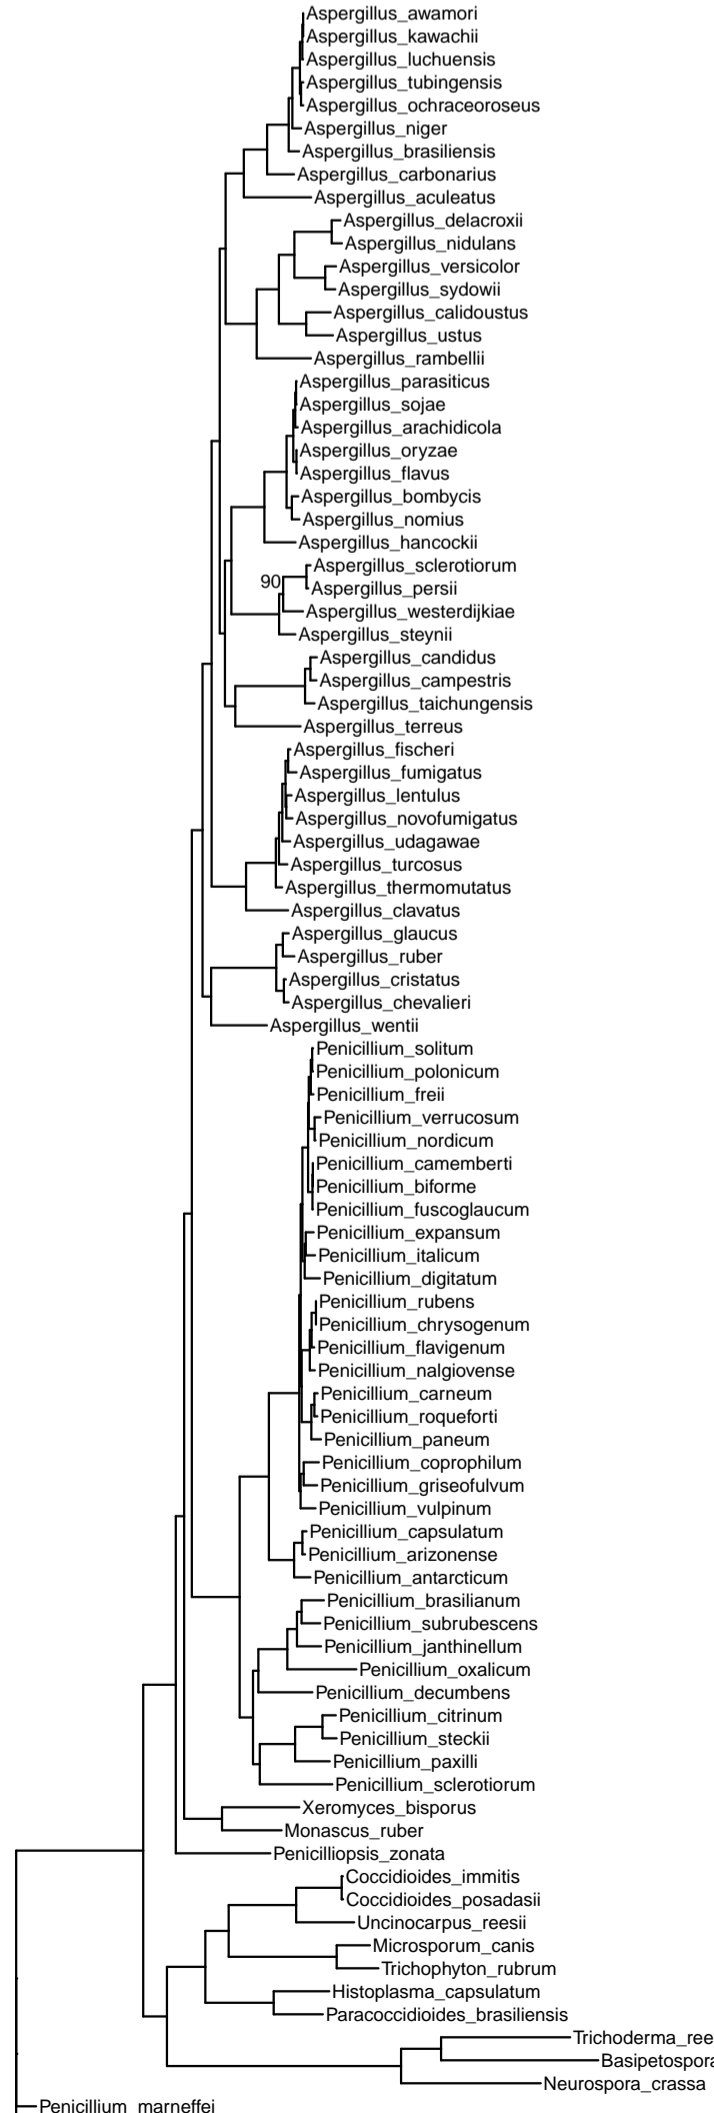

Aspergillaceae\_raxml\_ng\_run2\_Concatenation\_I

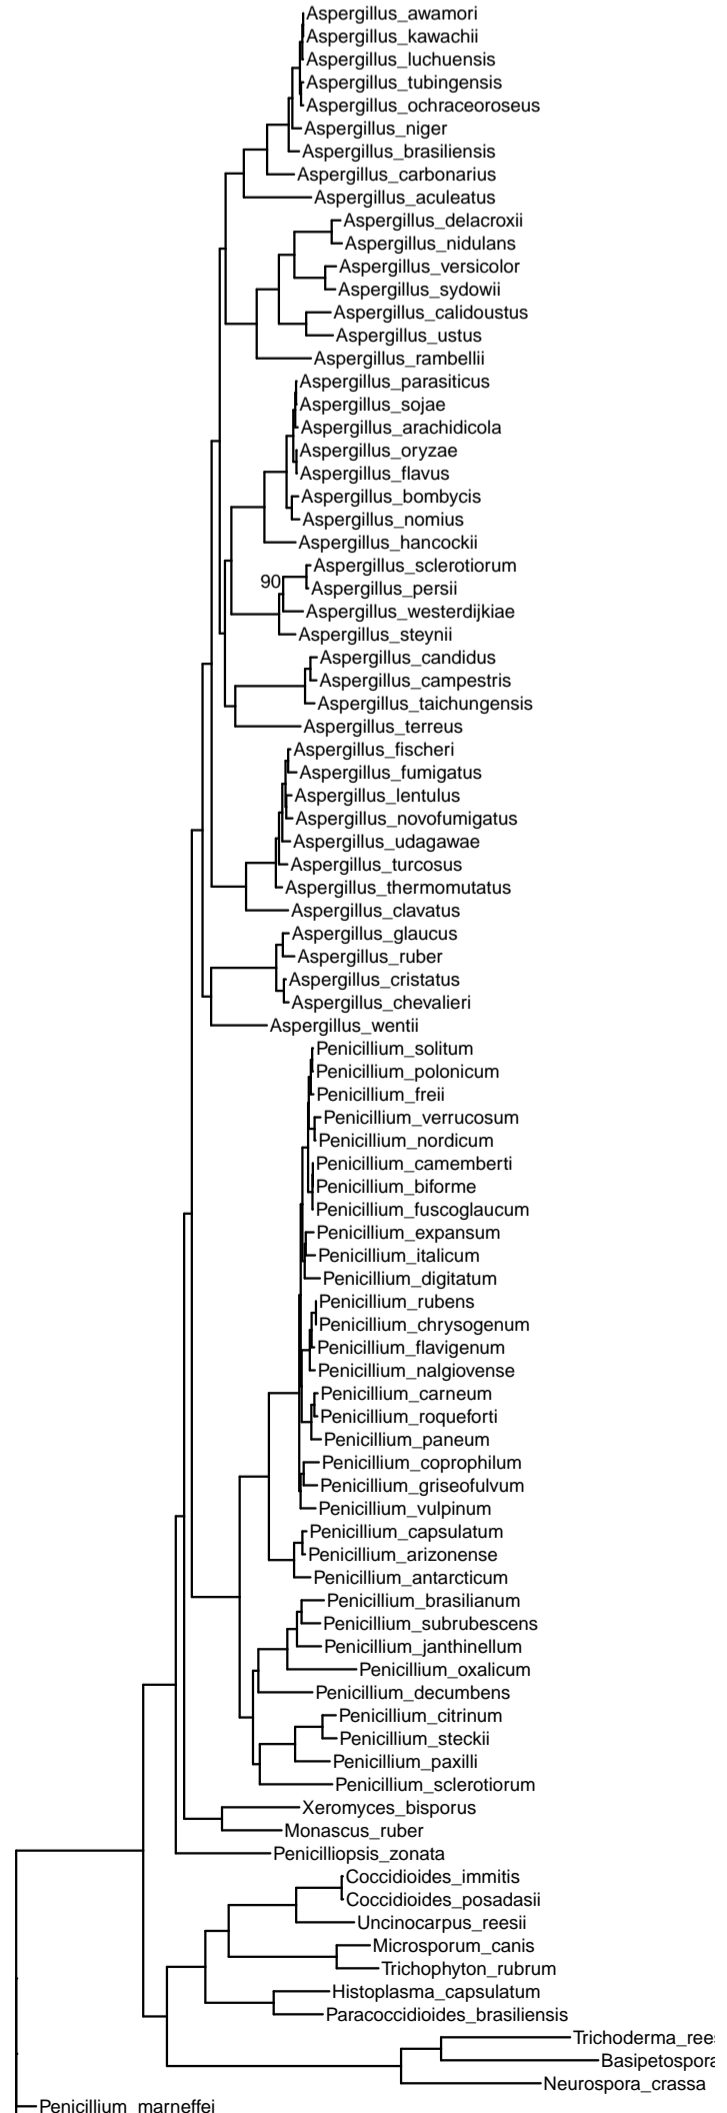



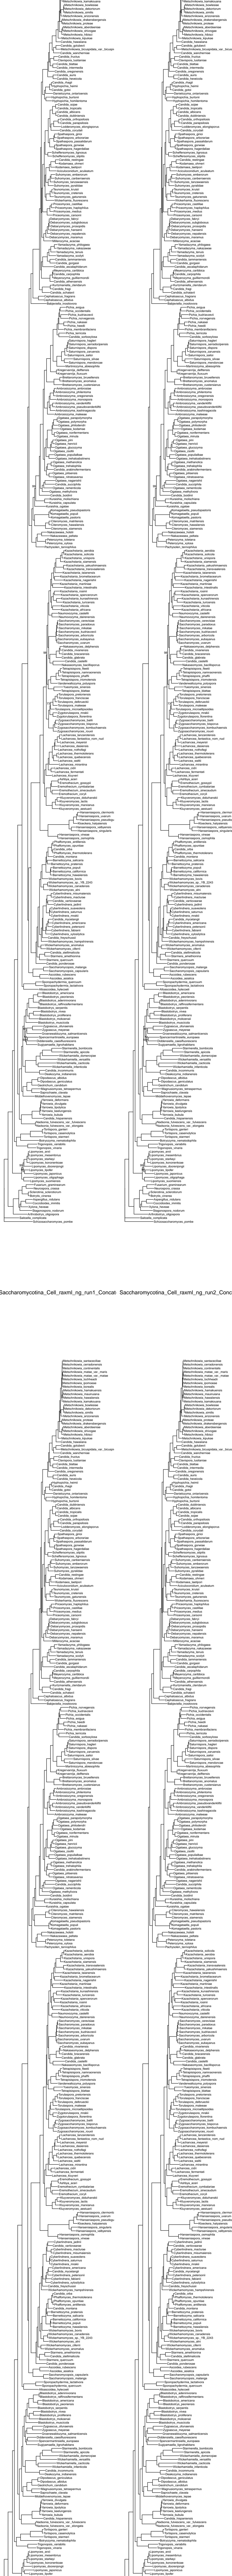

Hanseniaspora\_iqtree\_run1\_Concatenation\_ML

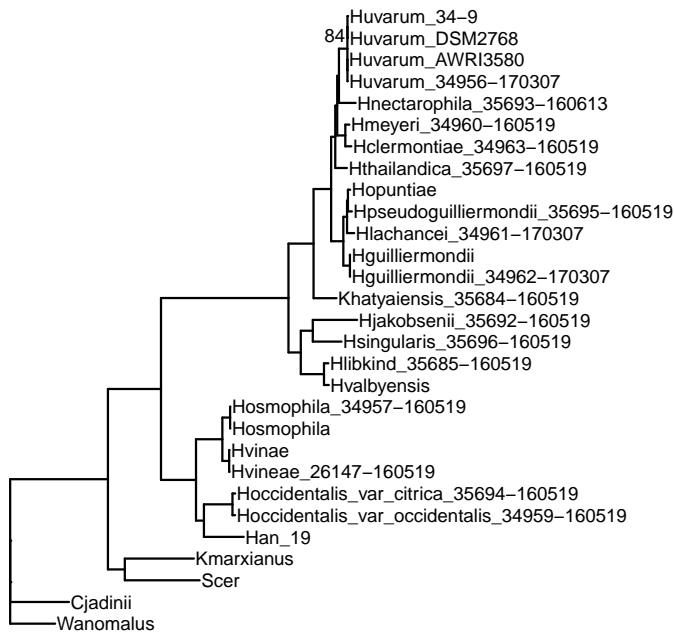

Hanseniaspora\_iqtree\_run2\_Concatenation\_ML

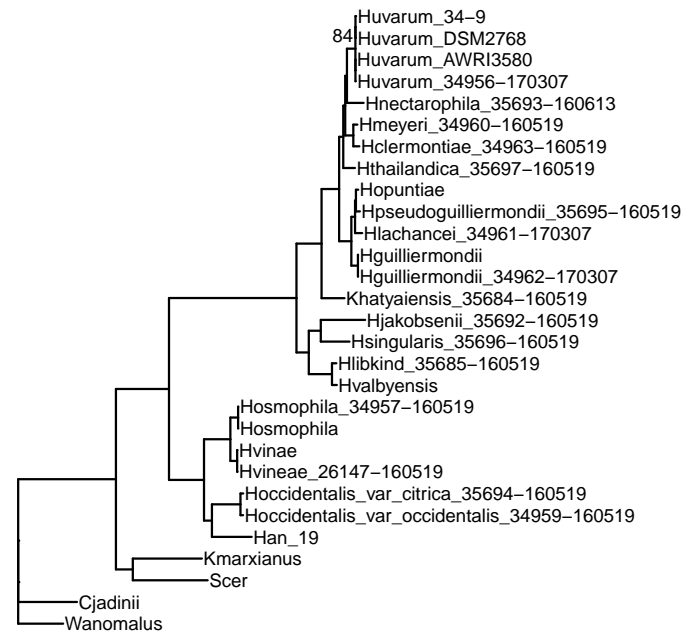

Hanseniaspora\_raxml\_ng\_run1\_Concatenation\_

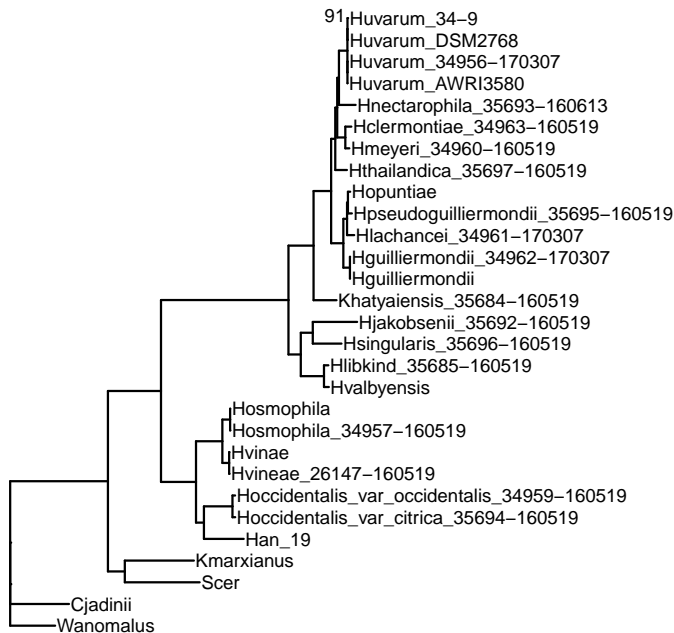

Hanseniaspora\_raxml\_ng\_run2\_Concatenation\_

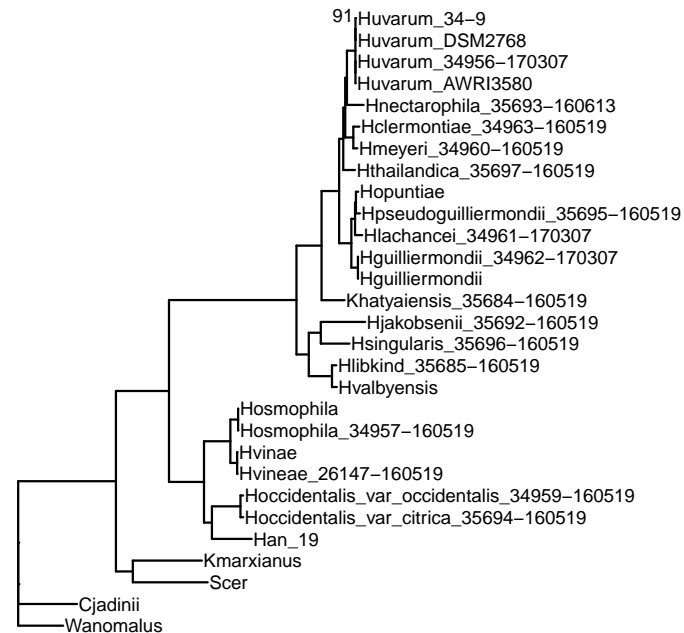

Rhizoplaca\_iqtree\_run1\_Concatenation\_ML

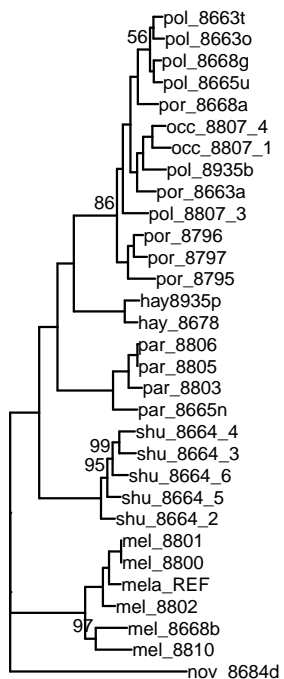

Rhizoplaca\_iqtree\_run2\_Concatenation\_ML

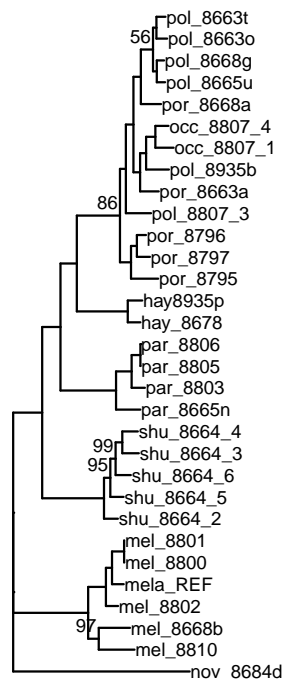

Rhizoplaca\_raxml\_ng\_run1\_Concatenation\_ML

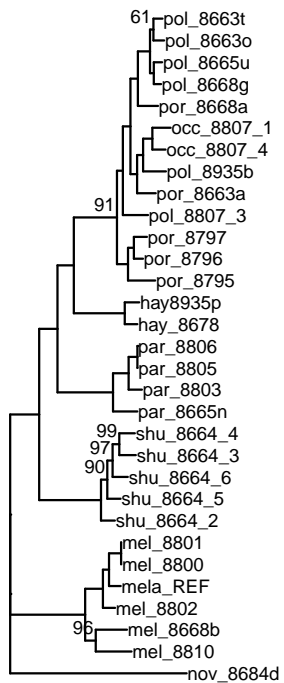

Rhizoplaca\_raxml\_ng\_run2\_Concatenation\_ML

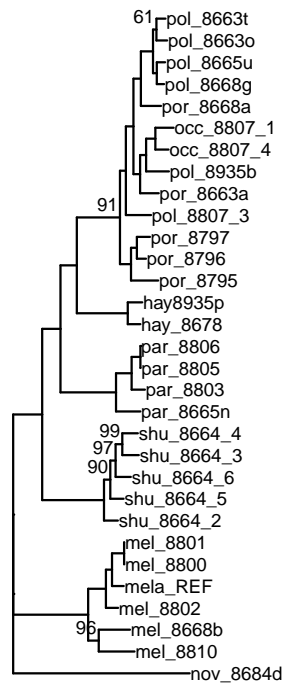

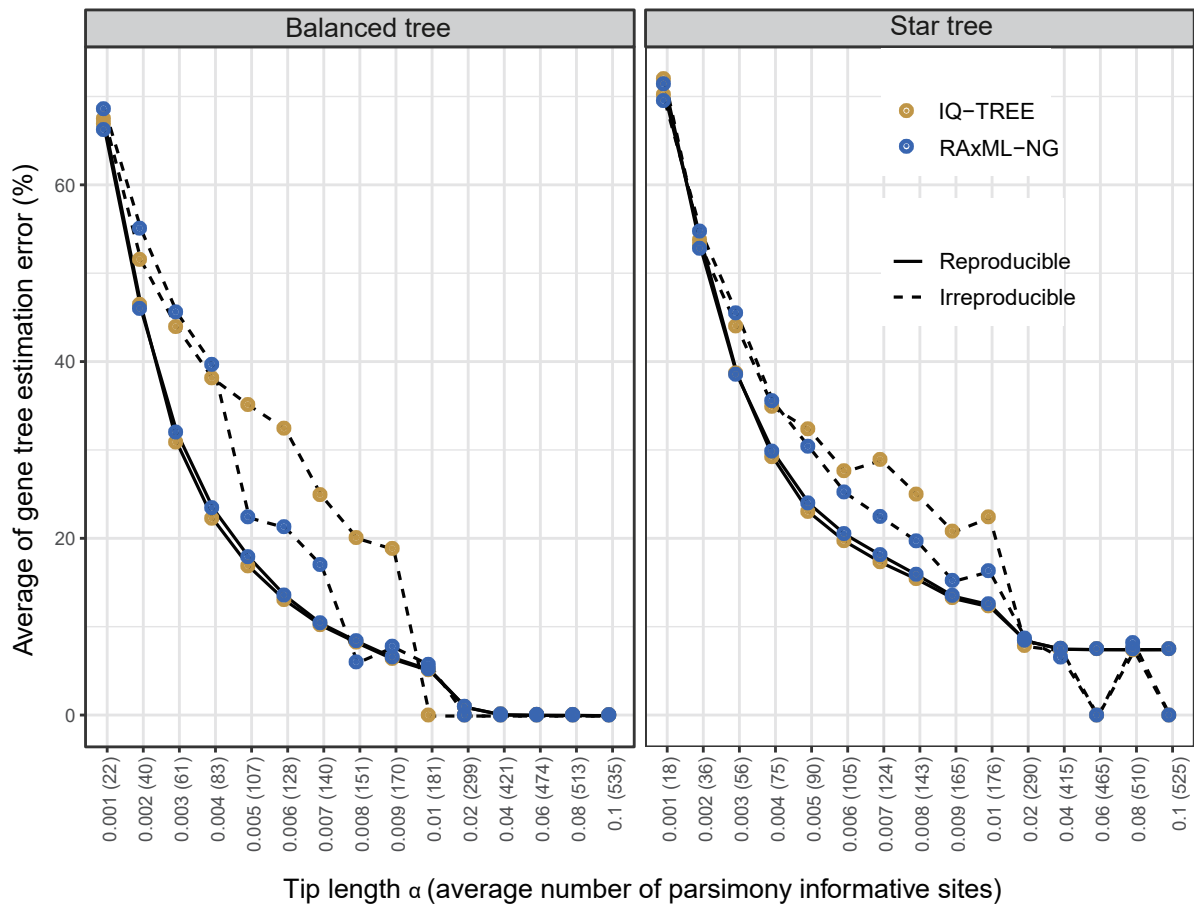

**Supplementary Figure 14. Effect of parsimony-informative sites on gene tree estimation error.** For each of 15 data points ( $\alpha = 0.001, 0.002, 0.003, 0.004, 0.005, 0.006, 0.007, 0.008, 0.009, 0.01, 0.02, 0.04, 0.06, 0.08, \text{ or } 0.1$ ), we simulated 500 nucleotide gene alignments, varying randomly in length from 300 to 1,000 base pairs with balanced tree or star tree (see Fig. 5a and 5b). For each gene alignment, its reproducibility was assessed between two replicates (Run1 and Run2) (i.e., each analysis was run on a single node, but Run1 was executed on a different node than Run2) using 2 threads on the CHTC cluster when using IQ-TREE (in yellow) and RAxML-NG (in blue), respectively. Gene tree estimation error is a normalized Robinson–Foulds tree distance between inferred gene tree and the reference species tree used in simulation. Overall, the average of gene tree estimation errors decreased with increasing number of parsimony-informative sites, but irreproducible genes exhibited higher levels of gene tree estimation error than reproducible genes.

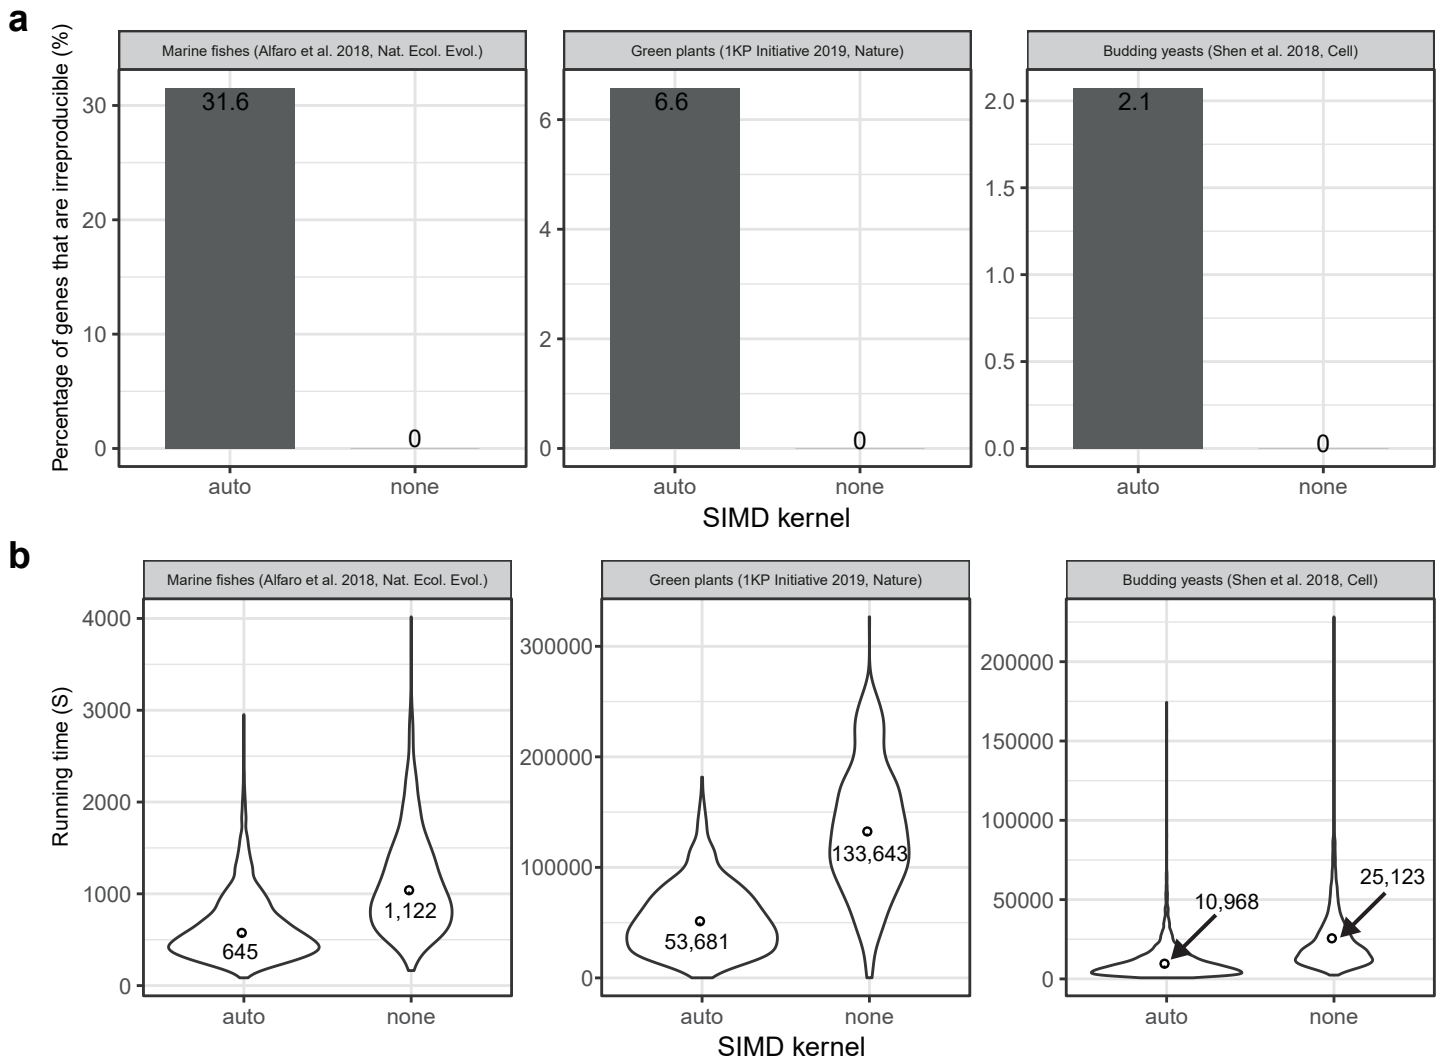

**Supplementary Figure 15. Comparison of runtime performance of optimal vector kernel (auto) and non-vectorized kernel (none) using RAxML-NG.** RAxML-NG can automatically detect the best set of vector instructions available on the processor architecture, and use the respective computational kernels to achieve optimal performance. For each of 3,819 genes from three representative studies (1,001 genes in the Marine fishes study, 410 genes in the Green plants study, 2408 genes in the Budding yeasts study), we ran two replicates (Run1 and Run2) jobs on two separate nodes (i.e., each analysis was run on a single node, but Run1 was executed on a different node than Run2) using RAxML-NG with the additional “—simd” option either set to “—simd auto” or to “—simd none”. (a) Percentage of genes that yielded irreproducible phylogenies under the “—simd auto” and “—simd none” options, respectively. (b) Distribution of running time (seconds) under the two options. Black dots in violin plots denote mean values. All 15,276 jobs (3,819 genes \* 2 replicates \* 1 program \* 2 experiments) were running using 2 threads per node on the Center for High Throughput Computing (CHTC) at the University of Wisconsin-Madison. Our results show all genes were reproducible under the “—simd none” option, but they required much longer runtimes.

## Supplementary References

1. Blaimer, B. B., Mawdsley, J. R. & Brady, S. G. Multiple origins of sexual dichromatism and aposematism within large carpenter bees. *Evolution (N. Y.)* **72**, 1874–1889 (2018).
2. Prum, R. O. *et al.* A comprehensive phylogeny of birds (Aves) using targeted next-generation DNA sequencing. *Nature* **526**, 569–573 (2015).
3. Espeland, M. *et al.* A Comprehensive and Dated Phylogenomic Analysis of Butterflies. *Curr. Biol.* **28**, 770-778.e5 (2018).
4. Blom, M. P. K., Bragg, J. G., Potter, S. & Moritz, C. Accounting for uncertainty in gene tree estimation: Summary-coalescent species tree inference in a challenging radiation of Australian lizards. *Syst. Biol.* **66**, 352–366 (2017).
5. Alfaro, M. E. *et al.* Explosive diversification of marine fishes at the Cretaceous–Palaeogene boundary. *Nat. Ecol. Evol.* **2**, 688–696 (2018).
6. Roycroft, E. J., Moussalli, A. & Rowe, K. C. Phylogenomics Uncovers Confidence and Conflict in the Rapid Radiation of Australo-Papuan Rodents. *Syst. Biol.* **0**, 1–14 (2019).
7. Herrando-Moraira, S. *et al.* Exploring data processing strategies in NGS target enrichment to disentangle radiations in the tribe Cardueae (Compositae). *Mol. Phylogenet. Evol.* **128**, 69–87 (2018).
8. Yang, Y. *et al.* Dissecting molecular evolution in the highly diverse plant clade caryophyllales using transcriptome sequencing. *Mol. Biol. Evol.* **32**, 2001–2014 (2015).
9. One Thousand Plant Transcriptomes Initiative. One thousand plant transcriptomes and the phylogenomics of green plants. *Nature* **574**, 679–685 (2019).
10. Wu, M., Kostyun, J. L., Hahn, M. W. & Moyle, L. C. Dissecting the basis of novel trait evolution in a radiation with widespread phylogenetic discordance. *Mol. Ecol.* **27**, 3301–3316 (2018).
11. Mitchell, N., Lewis, P. O., Lemmon, E. M., Lemmon, A. R. & Holsinger, K. E. Anchored phylogenomics improves the resolution of evolutionary relationships in the rapid radiation of *protea* L. *Am. J. Bot.* **104**, 102–115 (2017).
12. Steenwyk, J. L., Shen, X.-X., Lind, A. L., Goldman, G. H. & Rokas, A. A Robust Phylogenomic Time Tree for Biotechnologically and Medically Important Fungi in the Genera *Aspergillus* and *Penicillium*. *MBio* **10**, 1–25 (2019).
13. Shen, X.-X. *et al.* Tempo and Mode of Genome Evolution in the Budding Yeast Subphylum. *Cell* **175**, 1533–1545 (2018).
14. Steenwyk, J. L. *et al.* Extensive loss of cell-cycle and DNA repair genes in an ancient lineage of bipolar budding yeasts. *PLoS Biol.* **17**, e3000255 (2019).
15. Leavitt, S. D. *et al.* Resolving evolutionary relationships in lichen-forming fungi using diverse phylogenomic datasets and analytical approaches. *Sci. Rep.* **6**, 22262 (2016).
16. Stamatakis, A. RAxML version 8: A tool for phylogenetic analysis and post-analysis of large phylogenies. *Bioinformatics* **30**, 1312–1313 (2014).
17. Shimodaira, H. An approximately unbiased test of phylogenetic tree selection. *Syst. Biol.* **51**, 492–508 (2002).



18. Rambaut, A. & Grass, N. C. Seq-Gen: an application for the Monte Carlo simulation of DNA sequence evolution along phylogenetic trees. *Bioinformatics* **13**, 235–238 (1997).
19. Nguyen, L.-T., Schmidt, H. A., von Haeseler, A. & Minh, B. Q. IQ-TREE: A Fast and Effective Stochastic Algorithm for Estimating Maximum-Likelihood Phylogenies. *Mol. Biol. Evol.* **32**, 268–274 (2015).
20. Kozlov, A. M., Darriba, D., Flouri, T., Morel, B. & Stamatakis, A. RAxML-NG: a fast, scalable and user-friendly tool for maximum likelihood phylogenetic inference. *Bioinformatics* **35**, 4453–4455 (2019).
21. Biczok, R. *et al.* Two C++ libraries for counting trees on a phylogenetic terrace. *Bioinformatics* **34**, 3399–3401 (2018).
22. Sanderson, M. J., McMahon, M. M., Stamatakis, A., Zwickl, D. J. & Steel, M. Impacts of Terraces on Phylogenetic Inference. *Syst. Biol.* **64**, 709–726 (2015).
