# Supplementary material for: An investigation of irreproducibility in maximum likelihood phylogenetic inference
Source: PubMed Central journal article supplement (PMC7705714; doi:10.1038/s41467-020-20005-6), 2020-11-30
Supplement: 41467_2020_20005_MOESM3_ESM.pdf [file 41467_2020_20005_MOESM3_ESM.pdf]

## **Description of Additional Supplementary Files**

File name: Supplementary Data 1

Description: The list of 15 phylogenomic datasets examined in this study.

File name: Supplementary Data 2

Description: Summary of irreproducibility among 15 studies using 2 threads per node on CHTC cluster at the University of Wisconsin-Madison.

File name: Supplementary Data 3

Description: Summary of irreproducibility among 15 studies using 2 threads per node on ACCRE cluster at Vanderbilt University.

File name: Supplementary Data 4

Description: Summary of effects of computing resources on irreproducibility of phylogenies among three representative studies.

File name: Supplementary Data 5

Description: Summary of gene tree estimation errors between irreproducible phylogenies and reproducible phylogenies using simulated data.
